# Supplementary material for: Bi-fated tendon-to-bone attachment cells are regulated by shared enhancers and KLF transcription factors
Source: eLife. 2021 Jan 15;10:e55361. doi: 10.7554/eLife.55361 (PMC7810463; doi:10.7554/eLife.55361)
Supplement: Supplementary file 2. [file elife-55361-supp2.xlsx]

## Sheet: probe_libreries_order
	gene name	sequence 5'-3'	Amine conjujated to				gene name	sequence 5'-3'	Amine conjujated to
1	bgn_mouse	ggtgggagggaagctaaagg	alexa 647			1	wwp2_mouse	ccttcagatccaaatgactc	alexa 594
2	bgn_mouse	ttagttggtggactaggttg	alexa 647			2	wwp2_mouse	cagtagttcattcctcaagg	alexa 594
3	bgn_mouse	acacatggtcaatgttcctg	alexa 647			3	wwp2_mouse	ctgctagagttcttcacagg	alexa 594
4	bgn_mouse	gaaacccttctgctcaaagg	alexa 647			4	wwp2_mouse	cagggatgttacaccaacaa	alexa 594
5	bgn_mouse	ctcctcatcattcatcatga	alexa 647			5	wwp2_mouse	cagcaggaagagcatcaggg	alexa 594
6	bgn_mouse	cactgaaggtaggtgtgaca	alexa 647			6	wwp2_mouse	atagttgcgcacgtactcag	alexa 594
7	bgn_mouse	agtcagagcactgaacaacc	alexa 647			7	wwp2_mouse	tttggctgaagtgctgcatg	alexa 594
8	bgn_mouse	cttgggcacagtcttcagac	alexa 647			8	wwp2_mouse	gcactcgaagactggtagag	alexa 594
9	bgn_mouse	aatgtcattgttctgcaggt	alexa 647			9	wwp2_mouse	caagggatcatggtcagtcg	alexa 594
10	bgn_mouse	tttgaagtcatccttgcgaa	alexa 647			10	wwp2_mouse	ataatacacccgtccattgt	alexa 594
11	bgn_mouse	attgtttaccaagaccaggg	alexa 647			11	wwp2_mouse	tcgctggtgtatttcatctc	alexa 594
12	bgn_mouse	tctcatggatcttggagatc	alexa 647			12	wwp2_mouse	aaacttcggtcataggcacc	alexa 594
13	bgn_mouse	gtggttcttggagatgtaga	alexa 647			13	wwp2_mouse	ggaactggtgatacttccac	alexa 594
14	bgn_mouse	aggttgggaggaatctccac	alexa 647			14	wwp2_mouse	tagagcatttgagtggcaga	alexa 594
15	bgn_mouse	ttcgtagttctaccagggag	alexa 647			15	wwp2_mouse	ggaaacgctgatcttcacat	alexa 594
16	bgn_mouse	ttgcggatacggttgtcatg	alexa 647			16	wwp2_mouse	accacgcatgatgatgtaga	alexa 594
17	bgn_mouse	ccatctcaatgcagttcatg	alexa 647			17	wwp2_mouse	aaaaccactctctggcgatg	alexa 594
18	bgn_mouse	cttcaggccatcaaaggctc	alexa 647			18	wwp2_mouse	atgaacttcccatggtacag	alexa 594
19	bgn_mouse	tctgagatgcgcaggtaatt	alexa 647			19	wwp2_mouse	agagtcggtctcttgttgag	alexa 594
20	bgn_mouse	gagatctttggggatgccag	alexa 647			20	wwp2_mouse	agggtcaatagactccaggt	alexa 594
21	bgn_mouse	taggtcctccaactcaatag	alexa 647			21	wwp2_mouse	ttcagttcatgggttgtcac	alexa 594
22	bgn_mouse	tgtacagcttggagtatcga	alexa 647			22	wwp2_mouse	ggtaactcggatgttctcac	alexa 594
23	bgn_mouse	tgattgtgacctaagcccaa	alexa 647			23	wwp2_mouse	gaggggcaacctcattgaag	alexa 594
24	bgn_mouse	cccattctcaatcatccgaa	alexa 647			24	wwp2_mouse	cgatagatggcgttcttctg	alexa 594
25	bgn_mouse	gggtaggcagaaaactcagg	alexa 647			25	wwp2_mouse	ttgacaacctgccagaacca	alexa 594
26	bgn_mouse	gttgttgtccaagtgaagtt	alexa 647			26	wwp2_mouse	actctgtcgatgcagaactt	alexa 594
27	bgn_mouse	ttggtgatgttgttggagtg	alexa 647			27	wwp2_mouse	tagctcttatagggaggcag	alexa 594
28	bgn_mouse	attatagtaggccctcttga	alexa 647			28	wwp2_mouse	tagagggtgtgagacagcag	alexa 594
29	bgn_mouse	ggttgttgaagaggctgatg	alexa 647			29	wwp2_mouse	tatccaaaggggcctcttga	alexa 594
30	bgn_mouse	cagtaacgcagcggaaggtg	alexa 647			30	wwp2_mouse	gatcaaggcacagtctcgtg	alexa 594
31	bgn_mouse	ttccaaattggatggccagg	alexa 647			31	wwp2_mouse	ctggctttgcaacaggtaat	alexa 594
32	bgn_mouse	cactgcctctacttcttata	alexa 647			32	wwp2_mouse	agactcagtcctagtggaag	alexa 594
33	bgn_mouse	gggaacaaaggtgttgcttc	alexa 647			33	wwp2_mouse	ctctaaggcagggcatgttc	alexa 594
34	bgn_mouse	gtggggcagtgagttaatat	alexa 647			34	wwp2_mouse	ttctgggtttagtcagccag	alexa 594
35	bgn_mouse	taggagtcagggggaagctg	alexa 647			35	wwp2_mouse	caggtggtggcttctttaac	alexa 594
36	bgn_mouse	ttgaggggaatgggtgagag	alexa 647			36	wwp2_mouse	gcttgggaagctactgaatc	alexa 594
37	bgn_mouse	ggacatggttgatgaatgtt	alexa 647			37	wwp2_mouse	tgagctggcgcaagtgttaa	alexa 594
38	bgn_mouse	gatttatagggagtctctga	alexa 647			38	wwp2_mouse	gagtctcgtcagcatctgag	alexa 594
39	bgn_mouse	ccctcttgccaaaaacatct	alexa 647			39	wwp2_mouse	ctaactaggggagtctagca	alexa 594
40	bgn_mouse	agtgtgctctatccatcttt	alexa 647			40	wwp2_mouse	tactcgggacactgtcagga	alexa 594
41	bgn_mouse	tggatggaacaatggcggtg	alexa 647			41	wwp2_mouse	atgaggagtgtgtcgctata	alexa 594
42	bgn_mouse	gttgaagagagaacaccaga	alexa 647			42	wwp2_mouse	gagctagtgtatcttgggaa	alexa 594
43	bgn_mouse	gggattgacaggtagtgaac	alexa 647			43	wwp2_mouse	ccatgactagtttgagagca	alexa 594
44	bgn_mouse	ggtcaataactccagaagga	alexa 647			44	wwp2_mouse	atggaactgtcctcagaagg	alexa 594
45	bgn_mouse	agtatgaaccctttcctgga	alexa 647			45	wwp2_mouse	actcagatcagcatgtgcag	alexa 594
46	bgn_mouse	cttgatcctcgtcttgatag	alexa 647			46	wwp2_mouse	tctgtacacacttctgctac	alexa 594
47	bgn_mouse	caatgcaaactggttctggc	alexa 647			47	wwp2_mouse	atctgtcaaccaacttggtg	alexa 594
48	bgn_mouse	tgggtgcaactgaccatcac	alexa 647			48	wwp2_mouse	tattgcacaagaaactggca	alexa 594
