# Supplementary material for: Bi-fated tendon-to-bone attachment cells are regulated by shared enhancers and KLF transcription factors
Source: eLife. 2021 Jan 15;10:e55361. doi: 10.7554/eLife.55361 (PMC7810463; doi:10.7554/eLife.55361)
Supplement: Supplementary file 3. — The peaks were selected based on their enhanced ATAC-seq signal (cutoff of averaged ATAC-seq signal > 30.0) and their association with differentially expressed genes. ‘Attachment specific’ sheet lists 248 peaks that are accessible only in attachment cells. The table includes transcription factors such as Klf4, Runx3, and Nfia, in addition to ECM-associated genes such as Col11a1 and Bgn. [file elife-55361-supp3.xlsx]

## Sheet: Diffrential accesability
peak definition						average ATACseq signal			ascessable in
Peak	chr	start	end	associated Gene	Distance to TSS	tenocyte	attachment	chondrocytes	tenocyte	attachment	chondrocytes
chr1_12715390_12715890	chr1	12715390	12715890	Sulf1	-2905	39.8868	8.78029	0	1	0	0
chr1_12800586_12801143	chr1	12800586	12801143	Sulf1	82320	12.9535	45.1164	20.7722	0	1	0
chr1_24169380_24169914	chr1	24169380	24169914	Col9a1	-7963	12.038	110.991	111.651	0	1	1
chr1_24171409_24171909	chr1	24171409	24171909	Col9a1	-5951	14.7341	31.3563	15.0185	0	1	0
chr1_24179746_24180246	chr1	24179746	24180246	Col9a1	2386	10.0953	47.3682	48.3574	0	1	1
chr1_24195776_24196503	chr1	24195776	24196503	Col9a1	937	18.4378	162.441	392.19	0	1	1
chr1_24221675_24222175	chr1	24221675	24222175	Col9a1	26722	0	20.4393	48.3958	0	0	1
chr1_24227252_24227752	chr1	24227252	24227752	Col9a1	32299	1.54616	29.5937	41.7039	0	0	1
chr1_24230380_24230880	chr1	24230380	24230880	Col9a1	35427	4.64343	66.1072	223.56	0	1	1
chr1_24244779_24245296	chr1	24244779	24245296	Col9a1	49835	6.32969	27.0401	103.343	0	0	1
chr1_34005518_34006018	chr1	34005518	34006018	Dst	-6057	67.338	41.8165	28.8731	1	1	0
chr1_34060394_34060894	chr1	34060394	34060894	Dst	48819	32.4794	12.5226	4.12198	1	0	0
chr1_34167503_34168003	chr1	34167503	34168003	Dst	7423	32.9086	4.77293	0.979596	1	0	0
chr1_34218280_34218780	chr1	34218280	34218780	Dst	58200	23.1277	37.4218	45.2976	0	1	1
chr1_62416781_62417350	chr1	62416781	62417350	Nrp2	-286251	5.56161	35.3587	6.38658	0	1	0
chr1_62422819_62423319	chr1	62422819	62423319	Nrp2	-280248	2.92346	31.5245	31.1953	0	1	1
chr1_62550281_62550889	chr1	62550281	62550889	Nrp2	-152732	17.7216	97.2882	39.0129	0	1	1
chr1_62551466_62551966	chr1	62551466	62551966	Nrp2	-151601	30.9903	20.844	4.95848	1	0	0
chr1_62589264_62589764	chr1	62589264	62589764	Nrp2	-113803	5.04401	40.7217	6.67277	0	1	0
chr1_62591482_62591982	chr1	62591482	62591982	Nrp2	-111585	34.9072	17.9152	7.75417	1	0	0
chr1_62629945_62630445	chr1	62629945	62630445	Nrp2	-73122	7.55922	34.7488	17.5885	0	1	0
chr1_62647922_62648422	chr1	62647922	62648422	Nrp2	-55145	14.3115	30.973	15.3844	0	1	0
chr1_62696900_62697400	chr1	62696900	62697400	Nrp2	-6167	46.1598	67.7168	26.8121	1	1	0
chr1_62700970_62701470	chr1	62700970	62701470	Nrp2	-2097	28.525	34.6611	52.7656	0	1	1
chr1_62707459_62707959	chr1	62707459	62707959	Nrp2	4392	51.7162	32.8721	20.1201	1	1	0
chr1_62717989_62718489	chr1	62717989	62718489	Nrp2	14922	13.2135	46.4161	14.4462	0	1	0
chr1_72573965_72574465	chr1	72573965	72574465	Smarcal1	-9036	11.768	40.2363	24.7703	0	1	0
chr1_72640887_72641387	chr1	72640887	72641387	Smarcal1	57886	33.2694	18.1538	8.65117	1	0	0
chr1_72854812_72855312	chr1	72854812	72855312	Igfbp5	19803	26.2538	31.4286	30.0755	0	1	1
chr1_72865773_72866273	chr1	72865773	72866273	Igfbp5	8842	26.256	30.0992	16.3227	0	1	0
chr1_72868796_72869296	chr1	72868796	72869296	Igfbp5	5819	5.83054	19.6921	66.3311	0	0	1
chr1_72877780_72878280	chr1	72877780	72878280	Igfbp5	-3165	34.1702	21.8747	23.0973	1	0	0
chr1_72885589_72886117	chr1	72885589	72886117	Igfbp5	-10988	43.6587	54.8211	26.3223	1	1	0
chr1_74000272_74000772	chr1	74000272	74000772	Tns1	123925	13.3794	20.9531	46.888	0	0	1
chr1_74053937_74054437	chr1	74053937	74054437	Tns1	70260	66.1347	25.4528	25.6289	1	0	0
chr1_74069013_74069513	chr1	74069013	74069513	Tns1	55184	21.7727	30.6202	32.0539	0	1	1
chr1_74082810_74083310	chr1	74082810	74083310	Tns1	41387	22.1672	18.7817	30.1581	0	0	1
chr1_74091705_74092205	chr1	74091705	74092205	Tns1	32492	34.3156	22.3742	7.50927	1	0	0
chr1_74099058_74099558	chr1	74099058	74099558	Tns1	25139	40.8703	21.3691	18.5681	1	0	0
chr1_74111326_74111826	chr1	74111326	74111826	Tns1	12871	15.3375	17.008	41.4619	0	0	1
chr1_78642125_78642625	chr1	78642125	78642625	Utp14b	-15450	57.4484	17.7696	1.46939	1	0	0
chr1_78724400_78724900	chr1	78724400	78724900	Utp14b	66210	41.7008	41.9888	24.1595	1	1	0
chr1_87471463_87471963	chr1	87471463	87471963	3110079O15Rik	1449	4.09201	33.9803	97.901	0	1	1
chr1_87471902_87472402	chr1	87471902	87472402	3110079O15Rik	1888	1.94864	30.7935	156.15	0	1	1
chr1_87472218_87472718	chr1	87472218	87472718	3110079O15Rik	2204	2.27931	31.4103	103.836	0	1	1
chr1_132431775_132432275	chr1	132431775	132432275	Dstyk	14572	12.6404	34.3574	9.99956	0	1	0
chr1_133918727_133919227	chr1	133918727	133919227	Prelp	2424	2.13684	21.6606	65.7837	0	0	1
chr1_133924246_133924746	chr1	133924246	133924746	Prelp	-3095	9.22043	31.3206	86.9823	0	1	1
chr1_133953227_133953727	chr1	133953227	133953727	Prelp	-32076	9.22665	35.8204	33.0585	0	1	1
chr1_133965285_133965796	chr1	133965285	133965796	Prelp	-44140	27.065	104.527	72.5227	0	1	1
chr1_134195795_134196354	chr1	134195795	134196354	Mybph	2627	75.3876	11.5664	31.1156	1	0	1
chr1_134265718_134266218	chr1	134265718	134266218	Myog	-24036	5.99429	12.6693	32.8107	0	0	1
chr1_134292526_134293026	chr1	134292526	134293026	Myog	2772	4.82545	9.60693	32.3209	0	0	1
chr1_134298698_134299198	chr1	134298698	134299198	Myog	8944	26.6457	25.0052	35.9118	0	0	1
chr1_134299004_134299504	chr1	134299004	134299504	Myog	9250	26.6578	24.7892	35.9531	0	0	1
chr1_134302411_134302911	chr1	134302411	134302911	Myog	12657	32.7523	11.4664	12.6493	1	0	0
chr1_134307385_134307885	chr1	134307385	134307885	Myog	17631	43.2878	2.15709	0.489798	1	0	0
chr1_135565089_135565589	chr1	135565089	135565589	Nav1	20016	21.2875	32.9149	19.9357	0	1	0
chr1_135590702_135591202	chr1	135590702	135591202	Nav1	-5597	37.1954	1.56786	0.489798	1	0	0
chr1_135787744_135788244	chr1	135787744	135788244	Tnni1	-11427	25.5136	19.2018	31.5449	0	0	1
chr1_135794393_135794893	chr1	135794393	135794893	Tnni1	-4778	31.4464	31.5225	8.20267	1	1	0
chr1_163209055_163209608	chr1	163209055	163209608	Prrx1	104318	36.049	43.0866	8.93737	1	1	0
chr1_163251783_163252283	chr1	163251783	163252283	Prrx1	61617	35.2533	10.9567	5.01899	1	0	0
chr1_163281872_163282389	chr1	163281872	163282389	Prrx1	31519	7.93942	74.35	54.3781	0	1	1
chr1_170632315_170632815	chr1	170632315	170632815	Olfml2b	-11967	49.5384	31.9628	27.5247	1	1	0
chr1_170639045_170639694	chr1	170639045	170639694	Olfml2b	-5162	26.4754	35.0689	40.0395	0	1	1
chr1_170646294_170646794	chr1	170646294	170646794	Olfml2b	2012	20.1444	50.1452	29.0575	0	1	0
chr1_170655437_170655937	chr1	170655437	170655937	Olfml2b	11155	69.2856	4.15819	3.14239	1	0	0
chr1_170718172_170718864	chr1	170718172	170718864	Olfml2b	73986	69.6088	52.0761	15.0983	1	1	0
chr1_171294184_171294684	chr1	171294184	171294684	Ufc1	548	32.0987	31.6916	24.4649	1	1	0
chr1_179913350_179913850	chr1	179913350	179913850	Cdc42bpa	-47160	8.61579	30.9435	64.1078	0	1	1
chr1_180547735_180548235	chr1	180547735	180548235	Parp1	-20990	71.3443	21.3466	16.8125	1	0	0
chr1_180550729_180551229	chr1	180550729	180551229	Parp1	-17996	27.3293	21.8645	38.3195	0	0	1
chr1_184727378_184727878	chr1	184727378	184727878	Hlx	4865	19.1408	18.6248	30.7305	0	0	1
chr1_184748610_184749172	chr1	184748610	184749172	Hlx	-16398	41.797	59.4015	10.2032	1	1	0
chr1_184771526_184772026	chr1	184771526	184772026	Hlx	-39283	26.4552	27.6343	31.5449	0	0	1
chr1_191126179_191126679	chr1	191126179	191126679	Batf3	28015	32.5139	15.1302	22.8332	1	0	0
chr1_193376671_193377171	chr1	193376671	193377171	Camk1g	-6639	32.9447	25.2143	21.0171	1	0	0
chr1_193381917_193382712	chr1	193381917	193382712	Camk1g	-12033	119.433	53.6988	7.06077	1	1	0
chr1_193386113_193386613	chr1	193386113	193386613	Camk1g	-16081	47.1106	32.4491	26.2397	1	1	0
chr1_193402605_193403105	chr1	193402605	193403105	Camk1g	-32573	4.14015	8.06256	37.6232	0	0	1
chr1_194816836_194817336	chr1	194816836	194817336	Cd34	-121735	32.1913	27.822	39.0129	1	0	1
chr1_194945296_194945796	chr1	194945296	194945796	Cd34	6725	44.9891	7.31943	2.65259	1	0	0
chr10_8026950_8027450	chr10	8026950	8027450	Tab2	-71077	6.48737	35.2565	11.711	0	1	0
chr10_8086818_8087436	chr10	8086818	8087436	Tab2	-131004	2.37291	41.6586	177.798	0	1	1
chr10_8092100_8092600	chr10	8092100	8092600	Tab2	-136227	2.13263	29.4123	78.2706	0	0	1
chr10_8172994_8173494	chr10	8172994	8173494	Tab2	-217121	3.59923	42.054	41.3409	0	1	1
chr10_8176418_8177030	chr10	8176418	8177030	Tab2	-220601	56.3187	67.3908	20.5878	1	1	0
chr10_8211437_8211987	chr10	8211437	8211987	Tab2	-255589	5.32626	45.6843	98.3111	0	1	1
chr10_8213236_8213736	chr10	8213236	8213736	Tab2	-257363	7.18503	22.4699	36.9327	0	0	1
chr10_8213929_8214429	chr10	8213929	8214429	Tab2	-258056	12.5403	43.524	67.5777	0	1	1
chr10_13082397_13082897	chr10	13082397	13082897	Plagl1	-8141	47.0033	2.04903	1.673	1	0	0
chr10_13926834_13927334	chr10	13926834	13927334	Hivep2	-39295	11.0199	38.995	7.18178	0	1	0
chr10_13968945_13969445	chr10	13968945	13969445	Hivep2	2816	38.3432	27.4488	13.5079	1	0	0
chr10_13982689_13983189	chr10	13982689	13983189	Hivep2	16560	30.4842	17.8572	26.1571	1	0	0
chr10_14055580_14056080	chr10	14055580	14056080	Hivep2	89451	16.527	30.923	17.5059	0	1	0
chr10_14085751_14086251	chr10	14085751	14086251	Hivep2	119622	10.4762	37.478	14.16	0	1	0
chr10_14209919_14210419	chr10	14209919	14210419	Hivep2	243790	32.8315	13.4583	0.489798	1	0	0
chr10_24192763_24193263	chr10	24192763	24193263	Moxd1	-30504	3.25453	40.9745	67.0879	0	1	1
chr10_24210854_24211357	chr10	24210854	24211357	Moxd1	-12411	5.23233	31.861	89.8135	0	1	1
chr10_24235581_24236081	chr10	24235581	24236081	Moxd1	12314	53.8661	15.644	8.38707	1	0	0
chr10_24296422_24296922	chr10	24296422	24296922	Moxd1	73155	5.84082	28.8088	60.9078	0	0	1
chr10_24298481_24298981	chr10	24298481	24298981	Moxd1	75214	32.1206	29.0942	14.8534	1	0	0
chr10_24312047_24312547	chr10	24312047	24312547	Moxd1	88780	49.5737	42.26	27.0954	1	1	0
chr10_24312289_24312789	chr10	24312289	24312789	Moxd1	89022	33.375	23.0358	15.7917	1	0	0
chr10_24364843_24365343	chr10	24364843	24365343	Moxd1	141576	5.96963	42.0806	44.2326	0	1	1
chr10_24365371_24365871	chr10	24365371	24365871	Moxd1	142104	13.4129	53.7181	41.7644	0	1	1
chr10_24698119_24698619	chr10	24698119	24698619	Enpp1	13790	39.6123	9.33685	1.95919	1	0	0
chr10_24742989_24743489	chr10	24742989	24743489	Enpp1	-31080	8.28683	53.0831	33.5041	0	1	1
chr10_24754989_24755505	chr10	24754989	24755505	Enpp1	-43088	1.43139	53.558	57.0691	0	1	1
chr10_24767693_24768193	chr10	24767693	24768193	Enpp1	-55784	14.9372	80.3945	65.704	0	1	1
chr10_37159688_37160188	chr10	37159688	37160188	Marcks	-21012	41.835	7.823	1.673	1	0	0
chr10_37194218_37194718	chr10	37194218	37194718	Marcks	-55542	51.2606	42.9033	25.5876	1	1	0
chr10_37236419_37236919	chr10	37236419	37236919	Marcks	-97743	38.8025	8.8812	6.28478	1	0	0
chr10_37241824_37242331	chr10	37241824	37242331	Marcks	-103152	56.4842	38.8573	14.9359	1	1	0
chr10_37250083_37250583	chr10	37250083	37250583	Marcks	-111407	35.116	6.6364	2.65259	1	0	0
chr10_37251008_37251519	chr10	37251008	37251519	Marcks	-112338	62.5075	6.89128	2.55079	1	0	0
chr10_37300113_37300613	chr10	37300113	37300613	Marcks	-161437	38.8186	5.96462	1.46939	1	0	0
chr10_37357175_37357675	chr10	37357175	37357675	Marcks	-218499	32.7134	15.7602	5.22259	1	0	0
chr10_37397187_37397687	chr10	37397187	37397687	Marcks	-258511	30.8747	7.69251	5.83628	1	0	0
chr10_37422559_37423059	chr10	37422559	37423059	Marcks	-283883	49.2989	11.6805	2.65259	1	0	0
chr10_37571146_37571646	chr10	37571146	37571646	Marcks	-432470	25.0644	44.4528	2.65259	0	1	0
chr10_39291130_39291630	chr10	39291130	39291630	Fyn	-78419	31.559	21.316	43.7457	1	0	1
chr10_39291765_39292265	chr10	39291765	39292265	Fyn	-77784	50.7037	15.7571	8.54937	1	0	0
chr10_39434981_39435481	chr10	39434981	39435481	Fyn	65432	8.15829	32.7336	34.2993	0	1	1
chr10_41477722_41478222	chr10	41477722	41478222	Mical1	1658	36.7441	29.7282	32.3622	1	0	1
chr10_42502716_42503216	chr10	42502716	42503216	Snx3	912	52.3269	62.951	26.4654	1	1	0
chr10_42523681_42524262	chr10	42523681	42524262	Snx3	21918	4.12219	31.134	85.6752	0	1	1
chr10_51981566_51982066	chr10	51981566	51982066	Vgll2	-40686	30.4409	4.33257	0.489798	1	0	0
chr10_52029369_52029869	chr10	52029369	52029869	Vgll2	7117	35.5525	5.31628	1.95919	1	0	0
chr10_59824313_59824813	chr10	59824313	59824813	Dnajb12	-55028	1.64898	11.8304	35.6448	0	0	1
chr10_59824604_59825104	chr10	59824604	59825104	Dnajb12	-54737	1.54044	17.4107	48.3958	0	0	1
chr10_59848882_59849382	chr10	59848882	59849382	Dnajb12	-30459	3.89166	22.364	42.4828	0	0	1
chr10_59892954_59893454	chr10	59892954	59893454	Dnajb12	13613	34.5916	36.3362	25.0565	1	1	0
chr10_59894749_59895249	chr10	59894749	59895249	Dnajb12	15408	27.5428	27.9647	34.1591	0	0	1
chr10_60756919_60757419	chr10	60756919	60757419	Slc29a3	-4387	26.4316	39.1008	30.9725	0	1	1
chr10_60794329_60794829	chr10	60794329	60794829	Unc5b	37002	10.2116	69.9016	126.281	0	1	1
chr10_60814307_60814807	chr10	60814307	60814807	Unc5b	17024	16.5429	55.8358	88.0608	0	1	1
chr10_60834909_60835409	chr10	60834909	60835409	Unc5b	-3578	25.14	24.0746	30.1581	0	0	1
chr10_61920002_61920652	chr10	61920002	61920652	Col13a1	58781	48.7664	30.3898	16.4053	1	1	0
chr10_61965196_61965743	chr10	61965196	61965743	Col13a1	13638	28.458	21.3058	61.6175	0	0	1
chr10_62016923_62017423	chr10	62016923	62017423	Col13a1	-38065	46.9514	8.37557	5.30518	1	0	0
chr10_62023817_62024317	chr10	62023817	62024317	Col13a1	-44959	36.7178	8.86686	12.0193	1	0	0
chr10_62044343_62044843	chr10	62044343	62044843	Col13a1	-65485	32.3337	18.0641	18.0783	1	0	0
chr10_70966914_70967414	chr10	70966914	70967414	Bicc1	192526	48.8318	16.9325	9.14097	1	0	0
chr10_70983015_70983515	chr10	70983015	70983515	Bicc1	176425	43.4981	26.771	4.40818	1	0	0
chr10_71007930_71008430	chr10	71007930	71008430	Bicc1	151510	51.2275	18.7226	1.673	1	0	0
chr10_71010050_71010550	chr10	71010050	71010550	Bicc1	149390	59.4977	21.0602	2.69389	1	0	0
chr10_71032258_71032758	chr10	71032258	71032758	Bicc1	127182	10.2944	51.8856	24.1979	0	1	0
chr10_71058811_71059311	chr10	71058811	71059311	Bicc1	100629	24.2428	70.4848	112.487	0	1	1
chr10_71071130_71071630	chr10	71071130	71071630	Bicc1	88310	7.62504	34.224	5.87758	0	1	0
chr10_71084073_71084573	chr10	71084073	71084573	Bicc1	75367	5.4348	30.3676	7.75417	0	1	0
chr10_71092393_71092893	chr10	71092393	71092893	Bicc1	67047	8.33385	53.2729	13.2217	0	1	0
chr10_71094753_71095253	chr10	71094753	71095253	Bicc1	64687	10.0006	70.0565	22.1177	0	1	0
chr10_71114134_71114634	chr10	71114134	71114634	Bicc1	45306	38.6652	17.793	4.12198	1	0	0
chr10_71119447_71119947	chr10	71119447	71119947	Bicc1	39993	102.591	41.8656	17.0161	1	1	0
chr10_71138313_71138813	chr10	71138313	71138813	Bicc1	21127	37.2318	33.1474	4.12198	1	1	0
chr10_71140323_71140823	chr10	71140323	71140823	Bicc1	19117	22.8615	33.5817	16.8125	0	1	0
chr10_75930187_75930687	chr10	75930187	75930687	Mmp11	2065	31.7445	22.0541	11.7936	1	0	0
chr10_76255558_76256058	chr10	76255558	76256058	S100b	1972	3.56823	33.912	92.3893	0	1	1
chr10_77033639_77034139	chr10	77033639	77034139	Slc19a1	677	33.2436	16.7592	13.8546	1	0	0
chr10_77070027_77070527	chr10	77070027	77070527	Slc19a1	37065	12.4734	12.339	37.7884	0	0	1
chr10_77116496_77116996	chr10	77116496	77116996	Col18a1	-3041	39.5933	3.00318	2.20409	1	0	0
chr10_77151053_77151553	chr10	77151053	77151553	Col18a1	15227	14.3917	27.8902	33.6856	0	0	1
chr10_77165447_77165947	chr10	77165447	77165947	Col18a1	833	52.3056	28.1298	22.4039	1	0	0
chr10_77206603_77207103	chr10	77206603	77207103	Col18a1	-40323	64.389	53.0404	27.3845	1	1	0
chr10_77211212_77211712	chr10	77211212	77211712	Col18a1	-44932	45.1307	20.5984	7.99907	1	0	0
chr10_77627474_77627974	chr10	77627474	77627974	Ube2g2	5403	39.4332	25.3916	46.1121	1	0	1
chr10_78355947_78356455	chr10	78355947	78356455	Agpat3	-4501	20.0051	70.5388	17.7508	0	1	0
chr10_82955070_82955570	chr10	82955070	82955570	Chst11	-30177	32.6971	39.2945	21.262	1	1	0
chr10_82981473_82981973	chr10	82981473	82981973	Chst11	-3774	1.57465	44.9085	68.4747	0	1	1
chr10_83042878_83043440	chr10	83042878	83043440	Chst11	57662	7.45738	18.686	75.9014	0	0	1
chr10_83075428_83075928	chr10	83075428	83075928	Chst11	90181	1.13645	20.9317	72.6572	0	0	1
chr10_83088242_83088742	chr10	83088242	83088742	Chst11	102995	1.95016	8.70584	31.0743	0	0	1
chr10_83107809_83108309	chr10	83107809	83108309	Chst11	122562	4.57738	44.3345	122.382	0	1	1
chr10_83108221_83108721	chr10	83108221	83108721	Chst11	122974	4.74072	41.3792	114.647	0	1	1
chr10_83116860_83117360	chr10	83116860	83117360	Chst11	131613	31.6612	6.76079	1.46939	1	0	0
chr10_83130452_83131086	chr10	83130452	83131086	Chst11	145272	6.90189	138.839	438.404	0	1	1
chr10_83134761_83135261	chr10	83134761	83135261	Chst11	149514	9.90885	21.736	68.1472	0	0	1
chr10_83140289_83140871	chr10	83140289	83140871	Chst11	155083	8.37481	75.7825	219.95	0	1	1
chr10_83145660_83146496	chr10	83145660	83146496	Chst11	160581	3.82924	105.427	287.792	0	1	1
chr10_83150548_83151048	chr10	83150548	83151048	Chst11	165301	40.8686	29.2409	11.6726	1	0	0
chr10_84104623_84105123	chr10	84104623	84105123	Nuak1	335598	4.2382	63.0663	95.6143	0	1	1
chr10_84109233_84109733	chr10	84109233	84109733	Nuak1	330988	8.52871	66.6516	32.0347	0	1	1
chr10_84143930_84144510	chr10	84143930	84144510	Nuak1	296251	61.5698	27.9841	7.56978	1	0	0
chr10_84167441_84167941	chr10	84167441	84167941	Nuak1	272780	5.8678	25.9953	37.6261	0	0	1
chr10_84172892_84173524	chr10	84172892	84173524	Nuak1	267263	58.2412	55.1934	17.7095	1	1	0
chr10_84383146_84383646	chr10	84383146	84383646	Nuak1	57075	30.3801	8.36837	15.0983	1	0	0
chr10_84388385_84388885	chr10	84388385	84388885	Nuak1	51836	37.0504	21.2509	15.0983	1	0	0
chr10_84409256_84409756	chr10	84409256	84409756	Nuak1	30965	43.3956	5.92285	2.16279	1	0	0
chr10_84433232_84433742	chr10	84433232	84433742	Nuak1	6984	81.3592	12.3574	4.87589	1	0	0
chr10_84447449_84447949	chr10	84447449	84447949	Nuak1	-7228	35.1724	4.64244	5.55008	1	0	0
chr10_84450651_84451151	chr10	84450651	84451151	Nuak1	-10430	39.6392	41.4944	22.8937	1	1	0
chr10_87715377_87715883	chr10	87715377	87715883	Igf1	-142635	33.6424	10.8282	1.673	1	0	0
chr10_94458637_94459137	chr10	94458637	94459137	Tmcc3	-55970	40.5823	5.88412	3.91838	1	0	0
chr10_94462646_94463146	chr10	94462646	94463146	Tmcc3	-51961	88.3857	14.2453	2.44899	1	0	0
chr10_94463336_94463836	chr10	94463336	94463836	Tmcc3	-51271	34.0447	2.70964	0	1	0	0
chr10_94473517_94474017	chr10	94473517	94474017	Tmcc3	-41090	6.41551	20.7329	34.7065	0	0	1
chr10_94499573_94500073	chr10	94499573	94500073	Tmcc3	-15034	37.044	15.6369	2.36639	1	0	0
chr10_94500101_94500601	chr10	94500101	94500601	Tmcc3	-14506	41.9407	16.0732	3.83579	1	0	0
chr10_94523698_94524198	chr10	94523698	94524198	Tmcc3	9091	100.527	36.6307	24.4457	1	1	0
chr10_117089596_117090096	chr10	117089596	117090096	Cct2	-26032	2.29807	35.4013	56.6206	0	1	1
chr10_117521586_117522086	chr10	117521586	117522086	Cpm	-107664	8.90515	53.0209	56.1145	0	1	1
chr10_117526639_117527226	chr10	117526639	117527226	Cpm	-102567	2.19623	34.4053	61.29	0	1	1
chr10_117553181_117553764	chr10	117553181	117553764	Cpm	-76027	43.049	65.4894	14.5287	1	1	0
chr10_117559875_117560375	chr10	117559875	117560375	Cpm	-69375	35.2584	9.82306	3.93759	1	0	0
chr10_117669285_117669877	chr10	117669285	117669877	Cpm	40081	26.5681	66.9747	67.5998	0	1	1
chr10_121062679_121063179	chr10	121062679	121063179	Wif1	28925	22.4548	36.7	8.36498	0	1	0
chr10_121071212_121071723	chr10	121071212	121071723	Wif1	37464	6.42599	59.2454	25.4224	0	1	0
chr10_121150690_121151190	chr10	121150690	121151190	Wif1	116936	19.1618	110.984	95.5346	0	1	1
chr10_121161133_121161633	chr10	121161133	121161633	Wif1	127379	3.44425	23.5117	48.319	0	0	1
chr10_127228840_127229340	chr10	127228840	127229340	Pip4k2c	-17468	28.6619	36.9315	25.1804	0	1	0
chr10_128344802_128345323	chr10	128344802	128345323	Cs	7336	99.6607	40.8758	11.5074	1	1	0
chr11_3347027_3347527	chr11	3347027	3347527	Limk2	8864	27.7711	24.6496	38.3195	0	0	1
chr11_3374166_3374666	chr11	3374166	3374666	Limk2	-3024	88.7866	64.0878	14.6911	1	1	0
chr11_3394370_3394870	chr11	3394370	3394870	Limk2	14618	1.69864	11.5643	37.3783	0	0	1
chr11_4973136_4973636	chr11	4973136	4973636	Ap1b1	-13438	30.308	29.2186	29.5444	1	0	0
chr11_6068522_6069022	chr11	6068522	6069022	Camk2b	-3024	43.0662	25.4824	6.52968	1	0	0
chr11_7210290_7210790	chr11	7210290	7210790	Igfbp3	3383	53.0831	27.3774	30.3204	1	0	1
chr11_7281613_7282113	chr11	7281613	7282113	Igfbp3	-67940	35.5659	19.6943	0	1	0	0
chr11_7284762_7285294	chr11	7284762	7285294	Igfbp3	-71105	32.1579	85.2509	19.8531	1	1	0
chr11_7408898_7409398	chr11	7408898	7409398	Igfbp3	-195225	37.044	2.01845	0	1	0	0
chr11_7461781_7462281	chr11	7461781	7462281	Igfbp3	-248108	14.1309	30.0422	14.6498	0	1	0
chr11_7506377_7506924	chr11	7506377	7506924	Igfbp3	-292728	36.237	39.3261	14.3636	1	1	0
chr11_7542935_7543435	chr11	7542935	7543435	Igfbp3	-329262	38.3968	8.24712	1.673	1	0	0
chr11_32989976_32990490	chr11	32989976	32990490	Fgf18	157167	5.58904	33.752	72.6188	0	1	1
chr11_33050294_33050823	chr11	33050294	33050823	Fgf18	96841	12.8165	28.4133	95.5096	0	0	1
chr11_33070463_33070963	chr11	33070463	33070963	Fgf18	76687	12.0736	74.4819	56.15	0	1	1
chr11_33078010_33078510	chr11	33078010	33078510	Fgf18	69140	23.5123	19.422	54.235	0	0	1
chr11_52622705_52623270	chr11	52622705	52623270	Fstl4	-141718	7.02318	66.2366	38.9495	0	1	1
chr11_52848113_52848613	chr11	52848113	52848613	Fstl4	83657	2.21117	14.6245	40.3555	0	0	1
chr11_52888168_52888668	chr11	52888168	52888668	Fstl4	123712	40.6723	34.4125	15.8329	1	1	0
chr11_54058232_54058732	chr11	54058232	54058732	Pdlim4	10535	4.08479	20.1906	56.3344	0	0	1
chr11_54067256_54067756	chr11	54067256	54067756	Pdlim4	1511	38.5352	20.9786	30.7689	1	0	1
chr11_57128669_57129169	chr11	57128669	57129169	Gria1	115873	1.09348	13.542	32.3209	0	0	1
chr11_67081181_67081681	chr11	67081181	67081681	Myh3	3131	30.4807	24.9431	42.9668	1	0	1
chr11_67085349_67085849	chr11	67085349	67085849	Myh3	7299	23.6103	31.1432	26.4846	0	1	0
chr11_74747978_74748478	chr11	74747978	74748478	Mettl16	-22635	38.5206	3.56183	3.10109	1	0	0
chr11_75139117_75139617	chr11	75139117	75139617	Hic1	28785	32.4862	19.5117	17.8334	1	0	0
chr11_75139516_75140016	chr11	75139516	75140016	Hic1	28386	35.5576	19.9928	7.12128	1	0	0
chr11_75147662_75148162	chr11	75147662	75148162	Hic1	20240	39.8048	28.0238	23.0973	1	0	0
chr11_78161952_78162452	chr11	78161952	78162452	Traf4	3348	4.89778	22.0887	118.467	0	0	1
chr11_79593424_79593924	chr11	79593424	79593924	Rab11fip4	2462	45.2637	20.7461	39.9099	1	0	1
chr11_88197133_88197633	chr11	88197133	88197633	Mrps23	3277	30.5791	24.0847	7.22308	1	0	0
chr11_88216068_88216568	chr11	88216068	88216568	Mrps23	11930	38.3129	30.029	13.5492	1	1	0
chr11_88235774_88236274	chr11	88235774	88236274	Mrps23	31636	27.7401	32.1167	55.011	0	1	1
chr11_88240986_88241486	chr11	88240986	88241486	Mrps23	36848	7.22203	23.5272	38.8698	0	0	1
chr11_88241877_88242377	chr11	88241877	88242377	Mrps23	37739	4.27048	8.80774	36.1951	0	0	1
chr11_88726578_88727078	chr11	88726578	88727078	C030037D09Rik	8185	3.23336	25.6037	59.254	0	0	1
chr11_88728483_88728983	chr11	88728483	88728983	C030037D09Rik	10090	22.2066	33.7488	15.4257	0	1	0
chr11_88758321_88758821	chr11	88758321	88758821	C030037D09Rik	39928	21.6089	39.7624	27.2577	0	1	0
chr11_88765045_88765545	chr11	88765045	88765545	C030037D09Rik	46652	4.06531	73.0321	100.672	0	1	1
chr11_88765608_88766108	chr11	88765608	88766108	C030037D09Rik	47215	4.13293	39.9947	94.8796	0	1	1
chr11_88770341_88771041	chr11	88770341	88771041	C030037D09Rik	52048	15.5118	102.827	225.14	0	1	1
chr11_94239721_94240221	chr11	94239721	94240221	Wfikkn2	2608	10.3115	8.32451	38.5615	0	0	1
chr11_94340164_94340664	chr11	94340164	94340664	Ankrd40	12413	34.4601	28.7862	37.7471	1	0	1
chr11_94344543_94345043	chr11	94344543	94345043	Ankrd40	16792	9.32692	40.0712	45.1766	0	1	1
chr11_94346608_94347108	chr11	94346608	94347108	Ankrd40	18857	19.4732	46.1623	43.5008	0	1	1
chr11_94468496_94468996	chr11	94468496	94468996	Cacna1g	5452	68.7982	43.6474	14.3664	1	1	0
chr11_94468756_94469256	chr11	94468756	94469256	Cacna1g	5192	61.4396	44.622	10.8361	1	1	0
chr11_94565988_94566488	chr11	94565988	94566488	Chad	1164	3.51606	29.818	97.1471	0	0	1
chr11_94566368_94566868	chr11	94566368	94566868	Chad	1544	2.91162	23.0461	89.5744	0	0	1
chr11_94916457_94916957	chr11	94916457	94916957	Col1a1	-19517	42.2132	28.6456	11.6918	1	0	0
chr11_94917277_94917777	chr11	94917277	94917777	Col1a1	-18697	15.0188	53.2861	17.5885	0	1	0
chr11_94917689_94918189	chr11	94917689	94918189	Col1a1	-18285	14.6862	45.0787	30.5461	0	1	1
chr11_94933524_94934024	chr11	94933524	94934024	Col1a1	-2450	91.1278	95.696	28.73	1	1	0
chr11_95575829_95576329	chr11	95575829	95576329	Ngfr	11619	62.9198	55.1709	8.20267	1	1	0
chr11_95579363_95579863	chr11	95579363	95579863	Ngfr	8085	13.2859	48.2695	72.638	0	1	1
chr11_95585091_95585591	chr11	95585091	95585591	Ngfr	2357	60.2289	48.5345	23.6697	1	1	0
chr11_95595786_95596286	chr11	95595786	95596286	Ngfr	-8338	21.6301	30.7435	10.693	0	1	0
chr11_98754618_98755118	chr11	98754618	98755118	Thra	13083	32.8566	27.3306	60.7618	1	0	1
chr11_98922931_98923431	chr11	98922931	98923431	Rara	-14515	94.4764	43.309	9.09967	1	1	0
chr11_98954221_98954721	chr11	98954221	98954721	Rara	-6000	45.7099	27.7332	26.3607	1	0	0
chr11_98966542_98967042	chr11	98966542	98967042	Rara	6321	25.1721	31.5225	46.2331	0	1	1
chr11_101262193_101262693	chr11	101262193	101262693	Wnk4	1876	8.81786	32.3083	91.0601	0	1	1
chr11_101842234_101842814	chr11	101842234	101842814	Meox1	51830	28.3955	117.585	87.6565	0	1	1
chr11_101855973_101856473	chr11	101855973	101856473	Meox1	38131	34.307	17.1843	1.46939	1	0	0
chr11_101867392_101867892	chr11	101867392	101867892	Meox1	26712	56.6036	18.2599	4.16328	1	0	0
chr11_101901268_101901768	chr11	101901268	101901768	Meox1	-7164	19.2391	99.9938	50.7459	0	1	1
chr11_101919599_101920099	chr11	101919599	101920099	Meox1	-25495	34.6116	30.8842	16.5676	1	1	0
chr11_102445392_102445892	chr11	102445392	102445892	Fam171a2	2021	65.5839	24.8239	26.9552	1	0	0
chr11_105525546_105526046	chr11	105525546	105526046	Tanc2	-64190	31.3761	5.47427	6.77458	1	0	0
chr11_105591861_105592361	chr11	105591861	105592361	Tanc2	2125	35.0379	27.8301	6.77458	1	0	0
chr11_105609412_105609912	chr11	105609412	105609912	Tanc2	19676	5.03032	33.3391	9.14097	0	1	0
chr11_105758506_105759006	chr11	105758506	105759006	Tanc2	168770	37.1139	13.3422	1.22449	1	0	0
chr11_109703758_109704258	chr11	109703758	109704258	Fam20a	18248	12.7339	54.6827	6.52968	0	1	0
chr11_112754885_112755385	chr11	112754885	112755385	Sox9	-27075	2.21268	30.0382	56.3152	0	1	1
chr11_112757986_112758486	chr11	112757986	112758486	Sox9	-23974	2.23966	18.9867	31.1377	0	0	1
chr11_112788268_112788768	chr11	112788268	112788768	Sox9	6308	9.97436	51.6079	47.8705	0	1	1
chr11_113014549_113015049	chr11	113014549	113015049	2610035D17Rik	187039	18.6335	31.8057	12.6714	0	1	0
chr11_113015691_113016191	chr11	113015691	113016191	2610035D17Rik	185897	5.6825	27.4519	34.7891	0	0	1
chr11_113060918_113061418	chr11	113060918	113061418	2610035D17Rik	140670	11.592	38.114	33.6693	0	1	1
chr11_113078857_113079357	chr11	113078857	113079357	2610035D17Rik	122731	3.58368	39.059	68.541	0	1	1
chr11_113084348_113084848	chr11	113084348	113084848	2610035D17Rik	117240	0.767358	30.9903	48.2748	0	1	1
chr11_113084828_113085328	chr11	113084828	113085328	2610035D17Rik	116760	0.912827	63.5698	172.391	0	1	1
chr11_113085568_113086068	chr11	113085568	113086068	2610035D17Rik	116020	1.36376	51.5235	126.361	0	1	1
chr11_113096755_113097255	chr11	113096755	113097255	2610035D17Rik	104833	5.84359	22.9064	41.338	0	0	1
chr11_113101456_113101956	chr11	113101456	113101956	2610035D17Rik	100132	2.48145	23.1612	31.4623	0	0	1
chr11_113120896_113121666	chr11	113120896	113121666	2610035D17Rik	80557	8.13738	59.7553	232.319	0	1	1
chr11_113121841_113122341	chr11	113121841	113122341	2610035D17Rik	79747	3.7412	38.3483	38.1956	0	1	1
chr11_113122123_113122623	chr11	113122123	113122623	2610035D17Rik	79465	4.12842	36.6174	22.5249	0	1	0
chr11_113147477_113147977	chr11	113147477	113147977	2610035D17Rik	54111	1.76054	22.7616	60.927	0	0	1
chr11_113172377_113172877	chr11	113172377	113172877	2610035D17Rik	29211	10.8531	20.5454	35.7879	0	0	1
chr11_113173924_113174424	chr11	113173924	113174424	2610035D17Rik	27664	13.7455	37.9204	53.046	0	1	1
chr11_113183970_113184470	chr11	113183970	113184470	2610035D17Rik	17618	1.80448	19.9582	76.3278	0	0	1
chr11_113188370_113188870	chr11	113188370	113188870	2610035D17Rik	13218	1.00643	21.685	63.8024	0	0	1
chr11_113191955_113192455	chr11	113191955	113192455	2610035D17Rik	9633	6.81853	28.4632	31.3413	0	0	1
chr11_113194689_113195189	chr11	113194689	113195189	2610035D17Rik	6899	7.25222	52.3613	29.2582	0	1	0
chr11_113931639_113932139	chr11	113931639	113932139	Sdk2	134062	5.99126	31.1707	46.6844	0	1	1
chr11_113972536_113973036	chr11	113972536	113973036	Sdk2	93165	3.9383	11.6836	60.9683	0	0	1
chr11_114019050_114019550	chr11	114019050	114019550	Sdk2	46651	18.092	27.7057	51.7063	0	0	1
chr11_114029985_114030499	chr11	114029985	114030499	Sdk2	35709	4.94847	75.9843	173.701	0	1	1
chr11_114031418_114032001	chr11	114031418	114032001	Sdk2	34241	3.86639	143.095	402.679	0	1	1
chr11_114040563_114041063	chr11	114040563	114041063	Sdk2	25138	31.0083	6.66491	8.40627	1	0	0
chr11_114061238_114061738	chr11	114061238	114061738	Sdk2	4463	11.9315	58.905	91.0496	0	1	1
chr11_114061878_114062378	chr11	114061878	114062378	Sdk2	3823	13.6473	49.299	92.9204	0	1	1
chr11_114096743_114097243	chr11	114096743	114097243	Sdk2	-31042	1.32594	19.0877	46.5	0	0	1
chr11_114114576_114115076	chr11	114114576	114115076	Sdk2	-48875	1.59931	26.9371	82.2082	0	0	1
chr11_115176775_115177275	chr11	115176775	115177275	Nat9	10291	14.334	39.0488	43.8503	0	1	1
chr11_115182251_115182751	chr11	115182251	115182751	Nat9	4815	18.7871	21.4098	43.7044	0	0	1
chr11_115956419_115956919	chr11	115956419	115956919	Itgb4	-18056	3.9695	17.4116	43.4595	0	0	1
chr11_115970238_115970738	chr11	115970238	115970738	Itgb4	-4237	5.82734	33.8672	34.0544	0	1	1
chr11_115992028_115992528	chr11	115992028	115992528	Itgb4	17553	2.92216	13.6623	50.0275	0	0	1
chr11_116104018_116104711	chr11	116104018	116104711	Trim47	5870	24.9209	168.472	519.095	0	1	1
chr11_116117097_116117770	chr11	116117097	116117770	Trim47	-7199	21.0343	95.8528	177.241	0	1	1
chr11_116494477_116494977	chr11	116494477	116494977	Prpsap1	-4381	57.9809	8.20633	2.16279	1	0	0
chr11_116500899_116501399	chr11	116500899	116501399	Prpsap1	-10803	32.7086	21.2365	13.0786	1	0	0
chr11_118371626_118372190	chr11	118371626	118372190	Timp2	-16497	98.194	34.1903	19.7926	1	1	0
chr11_118372543_118373043	chr11	118372543	118373043	Timp2	-17382	22.2801	37.7806	11.469	0	1	0
chr11_118375745_118376245	chr11	118375745	118376245	Timp2	-20584	55.0319	20.895	3.63219	1	0	0
chr11_119091498_119091998	chr11	119091498	119091998	Cbx4	-5511	18.9202	18.6085	32.7281	0	0	1
chr11_119576857_119577357	chr11	119576857	119577357	Rptor	-25798	33.4322	11.4175	3.63219	1	0	0
chr11_119666530_119667030	chr11	119666530	119667030	Rptor	63875	13.918	21.3977	80.8982	0	0	1
chr11_119709166_119709666	chr11	119709166	119709666	Rptor	106511	2.03752	32.7477	66.1496	0	1	1
chr11_119909385_119909885	chr11	119909385	119909885	Chmp6	-4175	27.7983	33.0423	31.1377	0	1	1
chr11_119925145_119925645	chr11	119925145	119925645	Chmp6	11585	7.16216	30.5052	32.6455	0	1	1
chr12_8440314_8440814	chr12	8440314	8440814	Rhob	59421	1.05257	28.8496	57.3553	0	0	1
chr12_8445248_8445748	chr12	8445248	8445748	Rhob	54487	8.45959	11.6132	50.113	0	0	1
chr12_8456940_8457440	chr12	8456940	8457440	Rhob	42795	6.56939	18.007	49.6645	0	0	1
chr12_8787015_8787515	chr12	8787015	8787515	Sdc1	15869	5.15834	41.1897	16.6502	0	1	0
chr12_8798326_8798826	chr12	8798326	8798826	Sdc1	27180	21.4851	46.7046	44.8904	0	1	1
chr12_8798611_8799111	chr12	8798611	8799111	Sdc1	27465	22.7917	62.3058	61.6425	0	1	1
chr12_8799651_8800151	chr12	8799651	8800151	Sdc1	28505	4.19606	64.7118	35.9531	0	1	1
chr12_9752023_9752523	chr12	9752023	9752523	Osr1	177831	56.8064	13.8183	0	1	0	0
chr12_9872090_9872675	chr12	9872090	9872675	Osr1	297941	4.24029	42.9337	39.7889	0	1	1
chr12_29831353_29831853	chr12	29831353	29831853	Pxdn	-106433	4.57166	30.3849	18.3232	0	1	0
chr12_29883153_29883653	chr12	29883153	29883653	Pxdn	-54633	24.4421	15.3636	34.7478	0	0	1
chr12_30034614_30035114	chr12	30034614	30035114	Pxdn	96828	2.2778	25.8748	45.581	0	0	1
chr12_31236699_31237199	chr12	31236699	31237199	Lamb1	-28345	40.6376	11.2096	2.16279	1	0	0
chr12_31271342_31271842	chr12	31271342	31271842	Lamb1	6298	48.5931	34.6531	10.3242	1	1	0
chr12_31302020_31302520	chr12	31302020	31302520	Lamb1	36976	9.31059	28.6925	35.0148	0	0	1
chr12_69297002_69297502	chr12	69297002	69297502	Klhdc2	571	45.1305	36.7603	19.6687	1	1	0
chr12_70680015_70680515	chr12	70680015	70680515	Frmd6	-145249	67.3055	43.3619	21.7931	1	1	0
chr12_70719254_70719754	chr12	70719254	70719754	Frmd6	-106010	14.8438	35.2393	38.8285	0	1	1
chr12_70731341_70731865	chr12	70731341	70731865	Frmd6	-93911	3.19494	17.6003	37.7471	0	0	1
chr12_70799372_70799872	chr12	70799372	70799872	Frmd6	-25892	14.2456	28.5906	60.2278	0	0	1
chr12_70837498_70837998	chr12	70837498	70837998	Frmd6	12234	2.44403	32.1077	29.748	0	1	0
chr12_70877787_70878294	chr12	70877787	70878294	Frmd6	52527	11.7094	23.4854	83.9196	0	0	1
chr12_75352349_75352862	chr12	75352349	75352862	Rhoj	44293	49.8204	41.477	18.692	1	1	0
chr12_80057417_80057917	chr12	80057417	80057917	Zfp36l1	55346	16.3647	30.8334	11.9972	0	1	0
chr12_80062218_80062718	chr12	80062218	80062718	Zfp36l1	50545	35.2875	13.0719	23.8512	1	0	0
chr12_80062628_80063128	chr12	80062628	80063128	Zfp36l1	50135	41.9575	11.6519	9.48767	1	0	0
chr12_80071026_80071526	chr12	80071026	80071526	Zfp36l1	41737	2.42567	16.0231	42.6835	0	0	1
chr12_85169391_85169891	chr12	85169391	85169891	Pgf	6341	20.9302	29.5917	47.4191	0	0	1
chr12_85181687_85182187	chr12	85181687	85182187	Pgf	-4624	49.8664	9.39293	4.12198	1	0	0
chr12_85182225_85182725	chr12	85182225	85182725	Pgf	-5162	32.7267	8.11045	1.95919	1	0	0
chr12_85194582_85195082	chr12	85194582	85195082	Pgf	-17519	36.1567	17.7644	11.5074	1	0	0
chr12_85541075_85541575	chr12	85541075	85541575	Jdp2	-57780	48.4161	20.9307	47.422	1	0	1
chr12_85544755_85545255	chr12	85544755	85545255	Jdp2	-54100	9.26079	73.3828	81.3304	0	1	1
chr12_85547935_85548722	chr12	85547935	85548722	Jdp2	-50776	17.4662	180.823	384.537	0	1	1
chr12_85552146_85552646	chr12	85552146	85552646	Jdp2	-46709	3.36358	6.30412	34.6047	0	0	1
chr12_85571216_85571716	chr12	85571216	85571716	Jdp2	-27639	21.0082	33.5592	35.4249	0	1	1
chr12_85588659_85589159	chr12	85588659	85589159	Jdp2	-10196	3.35786	28.7048	54.2955	0	0	1
chr12_85589952_85590452	chr12	85589952	85590452	Jdp2	-8903	8.0296	76.5235	137.222	0	1	1
chr12_85601417_85601917	chr12	85601417	85601917	Jdp2	1649	14.5965	87.9002	185.97	0	1	1
chr12_85959800_85960300	chr12	85959800	85960300	Tgfb3	118991	43.5946	48.1922	16.6089	1	1	0
chr12_85969509_85970009	chr12	85969509	85970009	Tgfb3	109282	10.272	45.4528	53.7202	0	1	1
chr12_85973512_85974012	chr12	85973512	85974012	Tgfb3	105279	8.81239	44.1377	105.691	0	1	1
chr12_86010588_86011088	chr12	86010588	86011088	Tgfb3	68203	36.2168	16.1904	2.44899	1	0	0
chr12_86023025_86023525	chr12	86023025	86023525	Tgfb3	55766	28.914	60.5125	40.3997	0	1	1
chr12_86026963_86027463	chr12	86026963	86027463	Tgfb3	51828	35.2172	11.9251	2.65259	1	0	0
chr12_86037246_86037746	chr12	86037246	86037746	Tgfb3	41545	79.6538	42.9237	27.1396	1	1	0
chr12_104808522_104809034	chr12	104808522	104809034	Clmn	56298	17.8706	64.3955	80.5602	0	1	1
chr12_104813754_104814254	chr12	104813754	104814254	Clmn	51072	16.3975	34.8682	18.6507	0	1	0
chr12_104824577_104825077	chr12	104824577	104825077	Clmn	40249	23.2274	34.8905	34.4011	0	1	1
chr12_104829811_104830311	chr12	104829811	104830311	Clmn	35015	18.6914	32.0209	22.8332	0	1	0
chr12_104867830_104868330	chr12	104867830	104868330	Clmn	-3004	0	12.9609	36.8117	0	0	1
chr12_104896996_104897496	chr12	104896996	104897496	Clmn	-32170	12.5068	69.7495	215.283	0	1	1
chr12_104901310_104901810	chr12	104901310	104901810	Clmn	-36484	12.245	123.309	265.661	0	1	1
chr12_104904086_104904586	chr12	104904086	104904586	Clmn	-39260	14.5168	36.4789	65.9815	0	1	1
chr12_104923897_104924397	chr12	104923897	104924397	Clmn	-59071	39.4842	34.8886	28.0779	1	1	0
chr12_108393679_108394179	chr12	108393679	108394179	Eml1	-16704	14.167	30.2646	21.1381	0	1	0
chr12_108436437_108436937	chr12	108436437	108436937	Eml1	13871	39.3469	3.09699	0	1	0	0
chr12_109401168_109401668	chr12	109401168	109401668	Dlk1	-51405	35.1509	25.779	31.7485	1	0	1
chr12_109411299_109411799	chr12	109411299	109411799	Dlk1	-41274	35.5176	4.61796	5.79498	1	0	0
chr12_109412715_109413215	chr12	109412715	109413215	Dlk1	-39858	105.242	44.8238	5.59138	1	1	0
chr12_109424764_109425406	chr12	109424764	109425406	Dlk1	-27738	66.369	45.9453	20.2219	1	1	0
chr12_109432464_109433025	chr12	109432464	109433025	Dlk1	-20078	14.7773	162.77	346.939	0	1	1
chr12_109436208_109436708	chr12	109436208	109436708	Dlk1	-16365	14.8282	30.8414	67.1321	0	1	1
chr12_109445947_109446447	chr12	109445947	109446447	Dlk1	-6626	35.902	26.5987	40.8895	1	0	1
chr12_109449632_109450132	chr12	109449632	109450132	Dlk1	-2941	24.9312	42.266	58.1726	0	1	1
chr12_109450010_109450510	chr12	109450010	109450510	Dlk1	-2563	21.4788	43.7505	84.6543	0	1	1
chr12_109473577_109474077	chr12	109473577	109474077	Dlk1	20372	40.7551	8.62631	5.06028	1	0	0
chr12_113119421_113119921	chr12	113119421	113119921	Crip2	-20565	35.1128	28.8312	32.076	1	0	1
chr12_113146023_113146523	chr12	113146023	113146523	Crip2	5668	24.9738	24.4905	41.3188	0	0	1
chr13_16017609_16018109	chr13	16017609	16018109	Inhba	6008	10.8689	41.6769	40.174	0	1	1
chr13_16021812_16022312	chr13	16021812	16022312	Inhba	10211	4.21681	46.4803	42.5653	0	1	1
chr13_16075846_16076356	chr13	16075846	16076356	Inhba	64250	5.68423	43.3344	24.0164	0	1	0
chr13_16670111_16670644	chr13	16670111	16670644	Inhba	658527	25.94	50.1341	34.7862	0	1	1
chr13_31730662_31731162	chr13	31730662	31731162	Foxc1	-75734	3.89224	51.7222	17.9957	0	1	0
chr13_31760292_31760792	chr13	31760292	31760792	Foxc1	-46104	14.3645	23.5088	35.0119	0	0	1
chr13_31760985_31761485	chr13	31760985	31761485	Foxc1	-45411	4.98023	41.9991	37.7663	0	1	1
chr13_31764421_31764921	chr13	31764421	31764921	Foxc1	-41975	6.78243	55.9795	23.4248	0	1	0
chr13_31765374_31765874	chr13	31765374	31765874	Foxc1	-41022	5.51536	79.4748	113.283	0	1	1
chr13_31775688_31776188	chr13	31775688	31776188	Foxc1	-30708	5.6172	71.4499	95.7161	0	1	1
chr13_31776271_31776771	chr13	31776271	31776771	Foxc1	-30125	3.29847	12.2249	33.094	0	0	1
chr13_31779409_31779909	chr13	31779409	31779909	Foxc1	-26987	4.7119	42.005	116.279	0	1	1
chr13_31784733_31785375	chr13	31784733	31785375	Foxc1	-21592	29.9528	39.2709	29.9353	0	1	0
chr13_31800491_31800991	chr13	31800491	31800991	Foxc1	-5905	8.57321	40.7837	48.5831	0	1	1
chr13_31803504_31804004	chr13	31803504	31804004	Foxc1	-2892	11.84	56.6592	57.047	0	1	1
chr13_31970687_31971187	chr13	31970687	31971187	Foxc1	164291	15.2076	55.0555	32.8712	0	1	1
chr13_31993334_31993834	chr13	31993334	31993834	Foxc1	186938	4.32255	16.1873	40.4823	0	0	1
chr13_32018799_32019299	chr13	32018799	32019299	Foxc1	212403	16.3799	24.1173	33.9084	0	0	1
chr13_32036795_32037295	chr13	32036795	32037295	Foxc1	230399	3.05239	67.5466	46.0736	0	1	1
chr13_32048003_32048562	chr13	32048003	32048562	Foxc1	241637	7.02462	97.0048	127.077	0	1	1
chr13_34066109_34066680	chr13	34066109	34066680	Tubb2a	11613	11.3038	66.305	72.3547	0	1	1
chr13_34076620_34077120	chr13	34076620	34077120	Tubb2a	1138	51.5277	19.9601	8.40627	1	0	0
chr13_34084066_34084661	chr13	34084066	34084661	Tubb2a	-6356	4.95369	36.962	86.5146	0	1	1
chr13_37666401_37667008	chr13	37666401	37667008	Rreb1	-159333	56.7479	17.7062	21.4243	1	0	0
chr13_37735017_37735517	chr13	37735017	37735517	Rreb1	-90771	3.03422	32.7601	32.4006	0	1	1
chr13_37778119_37778619	chr13	37778119	37778619	Rreb1	-47669	44.8673	35.0629	29.8114	1	1	0
chr13_37778826_37779326	chr13	37778826	37779326	Rreb1	-46962	59.7332	24.7576	24.3026	1	0	0
chr13_37827695_37828195	chr13	37827695	37828195	Rreb1	552	59.8467	41.1253	20.486	1	1	0
chr13_37862411_37862911	chr13	37862411	37862911	Rreb1	-25773	20.6549	18.2293	55.5805	0	0	1
chr13_37942977_37943477	chr13	37942977	37943477	Ssr1	50963	6.52338	34.6001	41.7865	0	1	1
chr13_37946697_37947197	chr13	37946697	37947197	Ssr1	47243	17.5454	17.0589	34.0736	0	0	1
chr13_37966988_37967488	chr13	37966988	37967488	Ssr1	26952	55.56	17.9601	21.5453	1	0	0
chr13_38602245_38602762	chr13	38602245	38602762	Bloc1s5	32605	7.33187	74.4686	54.7603	0	1	1
chr13_42553543_42554043	chr13	42553543	42554043	Phactr1	-127006	3.47515	32.2176	24.1758	0	1	0
chr13_42934570_42935150	chr13	42934570	42935150	Phactr1	68613	55.683	34.5694	7.55057	1	1	0
chr13_55486427_55486927	chr13	55486427	55486927	Dbn1	1399	30.7899	16.8367	18.4855	1	0	0
chr13_55487145_55487645	chr13	55487145	55487645	Dbn1	681	40.8044	37.8184	25.8709	1	1	0
chr13_55640411_55640911	chr13	55640411	55640911	Ddx46	5662	34.7626	26.9483	18.5681	1	0	0
chr13_55855724_55856224	chr13	55855724	55856224	Pitx1	-24549	66.6805	13.2728	4.28429	1	0	0
chr13_55923469_55923969	chr13	55923469	55923969	Pitx1	-92294	22.215	31.1055	25.1391	0	1	0
chr13_56658059_56658559	chr13	56658059	56658559	Smad5	-44701	39.5303	31.4816	19.201	1	1	0
chr13_56673526_56674026	chr13	56673526	56674026	Smad5	-29234	7.5008	24.9329	38.4789	0	0	1
chr13_56682287_56682787	chr13	56682287	56682787	Smad5	-20473	12.7269	28.2776	36.0165	0	0	1
chr13_56689478_56689978	chr13	56689478	56689978	Smad5	-13282	8.11042	18.9225	37.6261	0	0	1
chr13_56692044_56692544	chr13	56692044	56692544	Smad5	-10716	6.66282	30.8935	57.2727	0	1	1
chr13_56698300_56698800	chr13	56698300	56698800	Smad5	-4460	64.5361	23.5537	16.0366	1	0	0
chr13_56705143_56705643	chr13	56705143	56705643	Smad5	1725	4.78622	12.1585	42.2321	0	0	1
chr13_56743140_56743640	chr13	56743140	56743640	Smad5	39722	3.00604	10.1157	35.0945	0	0	1
chr13_56752385_56752885	chr13	56752385	56752885	Smad5	48967	32.213	8.44283	7.75417	1	0	0
chr13_56777534_56778034	chr13	56777534	56778034	Smad5	74116	1.09013	15.1669	36.8309	0	0	1
chr13_56785979_56786479	chr13	56785979	56786479	Smad5	82561	3.38531	14.7102	31.1982	0	0	1
chr13_58840823_58841323	chr13	58840823	58841323	Ntrk2	33376	6.26057	25.4161	35.0945	0	0	1
chr13_58971427_58971927	chr13	58971427	58971927	Ntrk2	163980	21.7019	27.1471	50.3358	0	0	1
chr13_58976272_58976772	chr13	58976272	58976772	Ntrk2	168825	20.3352	59.9092	28.8923	0	1	0
chr13_59041389_59041889	chr13	59041389	59041889	Ntrk2	233942	23.86	38.7798	10.1206	0	1	0
chr13_59073784_59074284	chr13	59073784	59074284	Ntrk2	266337	27.5688	29.1054	30.1773	0	0	1
chr13_59092667_59093167	chr13	59092667	59093167	Ntrk2	285220	11.0112	48.9841	26.9773	0	1	0
chr13_59095792_59096370	chr13	59095792	59096370	Ntrk2	288384	73.6614	31.2921	6.59018	1	1	0
chr13_59652655_59653155	chr13	59652655	59653155	Golm1	22879	33.0534	2.54444	0.489798	1	0	0
chr13_60130946_60131446	chr13	60130946	60131446	Gas1	46339	9.8097	52.9363	16.9364	0	1	0
chr13_60147248_60147748	chr13	60147248	60147748	Gas1	30037	32.3758	15.3106	5.79498	1	0	0
chr13_60156483_60156983	chr13	60156483	60156983	Gas1	20802	38.3457	11.3512	3.59089	1	0	0
chr13_60172265_60172765	chr13	60172265	60172765	Gas1	5020	71.0947	18.5799	4.40818	1	0	0
chr13_63374331_63374831	chr13	63374331	63374831	Fancc	57164	3.02819	12.5072	42.7277	0	0	1
chr13_63411523_63412023	chr13	63411523	63412023	Fancc	19972	11.5027	33.1414	28.73	0	1	0
chr13_63496528_63497028	chr13	63496528	63497028	Fancc	-65033	34.4712	23.1652	7.55057	1	0	0
chr13_74166671_74167171	chr13	74166671	74167171	Exoc3	41779	33.4963	24.9105	22.28	1	0	0
chr13_78162920_78163420	chr13	78162920	78163420	Nr2f1	33279	43.3868	27.9708	39.2165	1	0	1
chr13_79442732_79443464	chr13	79442732	79443464	Nr2f1	-1244225	31.8341	97.1273	11.7523	1	1	0
chr13_83111305_83111805	chr13	83111305	83111805	Mef2c	-392479	34.313	5.37238	0.979596	1	0	0
chr13_83208144_83208700	chr13	83208144	83208700	Mef2c	-295612	3.0881	40.2896	14.9744	0	1	0
chr13_83352617_83353130	chr13	83352617	83353130	Mef2c	-151160	1.09039	15.2332	35.6227	0	0	1
chr13_83450704_83451310	chr13	83450704	83451310	Mef2c	-53027	14.3367	56.7	9.83437	0	1	0
chr13_83458746_83459246	chr13	83458746	83459246	Mef2c	-45038	6.16085	18.2782	38.1543	0	0	1
chr13_83461287_83462061	chr13	83461287	83462061	Mef2c	-42360	15.7916	54.4442	66.1467	0	1	1
chr13_83565720_83566220	chr13	83565720	83566220	Mef2c	-7637	3.02819	49.1942	47.0696	0	1	1
chr13_83566138_83566638	chr13	83566138	83566638	Mef2c	-7219	4.72413	34.8785	26.4846	0	1	0
chr13_83603352_83603852	chr13	83603352	83603852	Mef2c	29995	11.5004	44.1765	21.4656	0	1	0
chr13_83603830_83604330	chr13	83603830	83604330	Mef2c	30473	16.8335	68.6406	86.3465	0	1	1
chr13_83604254_83604754	chr13	83604254	83604754	Mef2c	30897	16.7602	37.8958	39.5853	0	1	1
chr13_83648987_83649487	chr13	83648987	83649487	Mef2c	75630	4.73037	72.0046	35.8676	0	1	1
chr13_83649581_83650081	chr13	83649581	83650081	Mef2c	76224	4.6782	54.7907	29.627	0	1	0
chr13_89336122_89336622	chr13	89336122	89336622	Hapln1	-204264	3.85433	47.2571	36.7454	0	1	1
chr13_89344204_89344781	chr13	89344204	89344781	Hapln1	-196143	5.02971	46.0206	29.9103	0	1	0
chr13_89394852_89395565	chr13	89394852	89395565	Hapln1	-145427	2.67912	55.6082	108.2	0	1	1
chr13_89428146_89428927	chr13	89428146	89428927	Hapln1	-112099	3.58699	82.7686	113.954	0	1	1
chr13_89463799_89464311	chr13	89463799	89464311	Hapln1	-76581	1.4027	37.2475	77.9431	0	1	1
chr13_89521303_89521872	chr13	89521303	89521872	Hapln1	-19048	11.9216	84.9144	64.9664	0	1	1
chr13_89542926_89543426	chr13	89542926	89543426	Hapln1	2540	22.4062	34.6194	20.9153	0	1	0
chr13_92750951_92751451	chr13	92750951	92751451	Thbs4	43617	27.6518	29.9117	40.6859	0	0	1
chr13_92755253_92755753	chr13	92755253	92755753	Thbs4	39315	1.42527	4.1368	31.0138	0	0	1
chr13_99488122_99488622	chr13	99488122	99488622	Map1b	28230	4.58211	35.5901	6.20218	0	1	0
chr13_99502088_99502588	chr13	99502088	99502588	Map1b	14264	8.97184	16.3901	31.7072	0	0	1
chr13_99514807_99515307	chr13	99514807	99515307	Map1b	1545	66.4494	35.9946	28.0558	1	1	0
chr13_99618255_99618755	chr13	99618255	99618755	Map1b	-101903	36.7181	3.60263	1.673	1	0	0
chr13_111616397_111616897	chr13	111616397	111616897	Mier3	-69531	30.5537	18.4769	1.95919	1	0	0
chr13_111658804_111659304	chr13	111658804	111659304	Mier3	-27124	35.9015	36.2505	11.4277	1	1	0
chr14_21951826_21952326	chr14	21951826	21952326	Zfp503	37525	12.302	54.7253	37.3812	0	1	1
chr14_21952557_21953073	chr14	21952557	21953073	Zfp503	36786	8.74367	47.5149	29.7509	0	1	0
chr14_21968942_21969442	chr14	21968942	21969442	Zfp503	20409	10.1015	28.4591	95.9197	0	0	1
chr14_21969284_21969784	chr14	21969284	21969784	Zfp503	20067	7.55922	19.107	49.4196	0	0	1
chr14_21995440_21995940	chr14	21995440	21995940	Zfp503	-6089	34.9128	26.0726	33.5233	1	0	1
chr14_24206624_24207124	chr14	24206624	24207124	Dlg5	39046	35.0096	24.6914	21.262	1	0	0
chr14_25749550_25750050	chr14	25749550	25750050	Zcchc24	19056	43.8091	15.5482	2.93879	1	0	0
chr14_25754741_25755241	chr14	25754741	25755241	Zcchc24	13865	30.7614	5.00333	1.46939	1	0	0
chr14_25756360_25756860	chr14	25756360	25756860	Zcchc24	12246	62.1791	46.0724	22.7314	1	1	0
chr14_25759585_25760085	chr14	25759585	25760085	Zcchc24	9021	20.7306	53.9538	28.2786	0	1	0
chr14_25776246_25776746	chr14	25776246	25776746	Zcchc24	-7640	30.4697	5.08082	5.20338	1	0	0
chr14_25787398_25787898	chr14	25787398	25787898	Zcchc24	-18792	19.4928	48.9584	17.3023	0	1	0
chr14_25795519_25796019	chr14	25795519	25796019	Zcchc24	-26913	57.5564	21.1836	4.40818	1	0	0
chr14_25800137_25800637	chr14	25800137	25800637	Zcchc24	-31531	46.1599	28.0584	50.8064	1	0	1
chr14_34453544_34454061	chr14	34453544	34454061	Bmpr1a	48743	18.5622	35.4553	18.692	0	1	0
chr14_46398323_46398823	chr14	46398323	46398823	Bmp4	-7904	14.0578	36.4065	49.2929	0	1	1
chr14_46436643_46437143	chr14	46436643	46437143	Bmp4	-46224	35.6882	16.4412	9.73257	1	0	0
chr14_46955369_46955869	chr14	46955369	46955869	Samd4	-45721	7.94996	38.3547	35.4412	0	1	1
chr14_46955728_46956228	chr14	46955728	46956228	Samd4	-45362	15.5748	82.7698	38.9082	0	1	1
chr14_46959169_46959669	chr14	46959169	46959669	Samd4	-41921	23.3191	93.2849	22.5278	0	1	0
chr14_46989612_46990112	chr14	46989612	46990112	Samd4	-11478	35.4163	38.9051	19.9549	1	1	0
chr14_46994674_46995174	chr14	46994674	46995174	Samd4	-6416	54.6303	27.9546	8.48887	1	0	0
chr14_47027471_47027971	chr14	47027471	47027971	Samd4	26381	8.94816	36.2965	5.50878	0	1	0
chr14_47051775_47052377	chr14	47051775	47052377	Samd4	-16901	1.75803	89.1176	172.11	0	1	1
chr14_47341802_47342430	chr14	47341802	47342430	Lgals3	-31744	7.17783	145.566	352.519	0	1	1
chr14_47374318_47374818	chr14	47374318	47374818	Lgals3	708	7.3426	39.7105	67.2281	0	1	1
chr14_52243938_52244438	chr14	52243938	52244438	Chd8	-6616	24.6381	43.0613	22.547	0	1	0
chr14_54443598_54444098	chr14	54443598	54444098	Mmp14	12250	84.7141	38.8999	11.2433	1	1	0
chr14_54939303_54939803	chr14	54939303	54939803	Cmtm5	3056	16.6228	20.7512	31.6275	0	0	1
chr14_54997262_54997762	chr14	54997262	54997762	Myh7	-2963	44.6805	0.775774	2.06099	1	0	0
chr14_55438137_55438690	chr14	55438137	55438690	Dhrs4	-40344	32.9351	28.3113	26.3607	1	0	0
chr14_55815213_55815713	chr14	55815213	55815713	Nfatc4	-9332	52.0429	51.6784	24.1979	1	1	0
chr14_65900235_65900985	chr14	65900235	65900985	Scara3	53134	44.0852	35.1678	4.12198	1	1	0
chr14_65903613_65904113	chr14	65903613	65904113	Scara3	49881	47.6181	20.8349	3.34599	1	0	0
chr14_65915889_65916389	chr14	65915889	65916389	Scara3	37605	2.92538	38.1539	50.8506	0	1	1
chr14_65942843_65943559	chr14	65942843	65943559	Scara3	10543	55.5432	13.332	9.01996	1	0	0
chr14_70502422_70502922	chr14	70502422	70502922	Bmp1	17588	30.7853	5.72915	1.95919	1	0	0
chr14_70513141_70513641	chr14	70513141	70513641	Bmp1	6869	39.599	13.1913	1.673	1	0	0
chr14_76442188_76442688	chr14	76442188	76442688	Tsc22d1	26617	6.05638	45.7659	12.8942	0	1	0
chr14_76489132_76489632	chr14	76489132	76489632	Tsc22d1	946	10.709	67.626	150.906	0	1	1
chr14_83958994_83959494	chr14	83958994	83959494	Pcdh17	-484319	15.1292	33.6654	7.55057	0	1	0
chr14_84444110_84444610	chr14	84444110	84444610	Pcdh17	797	45.5367	33.0057	15.057	1	1	0
chr14_120705455_120705955	chr14	120705455	120705955	Ipo5	-205489	33.3432	10.9873	0	1	0	0
chr14_120832283_120832783	chr14	120832283	120832783	Ipo5	-78661	51.041	38.8144	27.8301	1	1	0
chr14_120868389_120868889	chr14	120868389	120868889	Ipo5	-42555	35.4212	20.108	13.4666	1	0	0
chr14_120887798_120888298	chr14	120887798	120888298	Ipo5	-23146	8.07399	36.0251	11.6726	0	1	0
chr14_121053679_121054179	chr14	121053679	121054179	Farp1	18355	3.01912	33.282	44.2768	0	1	1
chr14_121059273_121059773	chr14	121059273	121059773	Farp1	23949	50.5957	12.3584	6.03988	1	0	0
chr14_121062250_121062750	chr14	121062250	121062750	Farp1	26926	57.7581	18.7104	9.46846	1	0	0
chr14_121082289_121082789	chr14	121082289	121082789	Farp1	46965	33.1399	9.09124	9.54817	1	0	0
chr14_121097989_121098489	chr14	121097989	121098489	Farp1	62665	32.7879	5.82492	7.22308	1	0	0
chr14_121107705_121108275	chr14	121107705	121108275	Farp1	72416	10.7622	105.012	173.978	0	1	1
chr14_121119867_121120367	chr14	121119867	121120367	Farp1	84543	37.4262	33.9629	10.5278	1	1	0
chr14_121126192_121126692	chr14	121126192	121126692	Farp1	90868	16.0514	39.8245	30.8899	0	1	1
chr14_121129330_121129830	chr14	121129330	121129830	Farp1	94006	11.2624	37.5205	38.5644	0	1	1
chr14_121137105_121137605	chr14	121137105	121137605	Farp1	101781	17.4596	45.2704	73.4965	0	1	1
chr14_121168213_121168713	chr14	121168213	121168713	Farp1	132889	1.97292	11.284	41.3764	0	0	1
chr14_121168536_121169036	chr14	121168536	121169036	Farp1	133212	1.80348	15.8102	50.8832	0	0	1
chr14_121170338_121170838	chr14	121170338	121170838	Farp1	135014	3.11027	8.39188	35.7879	0	0	1
chr14_121171979_121172479	chr14	121171979	121172479	Farp1	136655	27.9797	67.7199	75.4144	0	1	1
chr14_121172567_121173067	chr14	121172567	121173067	Farp1	137243	25.3998	20.316	38.9303	0	0	1
chr14_121183334_121183834	chr14	121183334	121183834	Farp1	148010	5.27651	31.5265	12.2008	0	1	0
chr14_121191690_121192190	chr14	121191690	121192190	Farp1	156366	32.6163	12.1565	1.71429	1	0	0
chr14_121192398_121192898	chr14	121192398	121192898	Farp1	157074	8.02208	34.3789	66.8046	0	1	1
chr14_121193614_121194114	chr14	121193614	121194114	Farp1	158290	1.14617	9.07484	33.2976	0	0	1
chr14_121198970_121199548	chr14	121198970	121199548	Farp1	163685	12.0148	148.464	306.388	0	1	1
chr14_121199780_121200280	chr14	121199780	121200280	Farp1	164456	36.1778	10.2675	24.4841	1	0	0
chr14_121205393_121205893	chr14	121205393	121205893	Farp1	170069	28.7827	64.7665	36.8088	0	1	1
chr15_10928741_10929398	chr15	10928741	10929398	C1qtnf3	-23262	16.4948	55.3119	64.6523	0	1	1
chr15_10940113_10940734	chr15	10940113	10940734	C1qtnf3	-11908	109.801	50.6327	6.28478	1	1	0
chr15_10947760_10948260	chr15	10947760	10948260	C1qtnf3	-4322	4.04918	10.1544	87.7583	0	0	1
chr15_10952795_10953295	chr15	10952795	10953295	C1qtnf3	688	37.4293	22.0195	6.08118	1	0	0
chr15_24588973_24589473	chr15	24588973	24589473	Basp1	824541	45.137	39.4116	13.5079	1	1	0
chr15_24682042_24682542	chr15	24682042	24682542	Basp1	731472	54.0285	10.341	1.46939	1	0	0
chr15_25019320_25019820	chr15	25019320	25019820	Basp1	394194	42.452	14.7938	3.38729	1	0	0
chr15_25140738_25141238	chr15	25140738	25141238	Basp1	272776	38.6221	16.0099	8.44757	1	0	0
chr15_25364243_25364743	chr15	25364243	25364743	Basp1	49271	20.0493	39.9856	28.7079	0	1	0
chr15_25370252_25370752	chr15	25370252	25370752	Basp1	43262	1.83266	7.42139	30.6863	0	0	1
chr15_25411996_25412496	chr15	25411996	25412496	Basp1	1518	49.7542	41.2375	18.3232	1	1	0
chr15_27925867_27926367	chr15	27925867	27926367	Trio	99731	44.0445	14.282	30.7305	1	0	1
chr15_27992120_27992620	chr15	27992120	27992620	Trio	33478	8.58108	21.5985	30.4222	0	0	1
chr15_28024953_28025453	chr15	28024953	28025453	Trio	645	55.3499	42.4812	27.0983	1	1	0
chr15_28066389_28066889	chr15	28066389	28066889	Trio	-40791	37.2271	13.0241	1.46939	1	0	0
chr15_34212402_34212902	chr15	34212402	34212902	Laptm4b	-25374	9.24528	22.6147	41.9104	0	0	1
chr15_74930491_74930991	chr15	74930491	74930991	Ly6e	-24310	8.20679	34.5308	15.7724	0	1	0
chr15_74933967_74934530	chr15	74933967	74934530	Ly6e	-20802	23.9013	61.6013	26.9965	0	1	0
chr15_74955589_74956089	chr15	74955589	74956089	Ly6e	733	43.5895	43.2223	22.2195	1	1	0
chr15_75856824_75857337	chr15	75856824	75857337	Gsdmd	-5258	29.7191	34.8273	65.6982	0	1	1
chr15_75873331_75873831	chr15	75873331	75873831	Gsdmd	11242	36.5858	15.275	21.0171	1	0	0
chr15_76460240_76460740	chr15	76460240	76460740	Scx	3052	294.143	111.568	21.7681	1	1	0
chr15_76576874_76577374	chr15	76576874	76577374	Adck5	765	51.7162	25.0471	14.16	1	0	0
chr15_77150467_77150967	chr15	77150467	77150967	Rbfox2	3095	51.4811	43.1847	21.3033	1	1	0
chr15_77152943_77153443	chr15	77152943	77153443	Rbfox2	619	51.4152	46.7139	8.65117	1	1	0
chr15_77162950_77163450	chr15	77162950	77163450	Rbfox2	-9388	42.471	5.9799	2.16279	1	0	0
chr15_77163290_77163790	chr15	77163290	77163790	Rbfox2	-9728	88.1204	12.6531	3.14239	1	0	0
chr15_77202202_77202702	chr15	77202202	77202702	Rbfox2	-48640	50.4242	18.1314	17.5059	1	0	0
chr15_77254585_77255085	chr15	77254585	77255085	Rbfox2	52218	28.9255	34.5674	34.4011	0	1	1
chr15_77278835_77279335	chr15	77278835	77279335	Rbfox2	27968	36.4927	3.71886	4.12198	1	0	0
chr15_77298379_77298931	chr15	77298379	77298931	Rbfox2	8398	17.7177	56.2045	19.7513	0	1	0
chr15_77344074_77344574	chr15	77344074	77344574	Rbfox2	-37271	65.6587	37.8632	11.8349	1	1	0
chr15_80717327_80717827	chr15	80717327	80717827	Tnrc6b	6264	4.35774	12.1066	38.6854	0	0	1
chr15_80799671_80800171	chr15	80799671	80800171	Tnrc6b	1311	52.5408	28.2031	21.0555	1	0	0
chr15_80861942_80862442	chr15	80861942	80862442	Tnrc6b	63582	1.58386	11.0934	33.3197	0	0	1
chr15_81062034_81062534	chr15	81062034	81062534	Mkl1	42763	50.564	23.0715	24.6877	1	0	0
chr15_81087016_81087516	chr15	81087016	81087516	Mkl1	17781	44.5163	19.8797	3.63219	1	0	0
chr15_81128155_81128655	chr15	81128155	81128655	Mkl1	-23358	40.1152	8.51421	1.71429	1	0	0
chr15_81129954_81130454	chr15	81129954	81130454	Mkl1	-25157	7.03411	42.5668	35.7053	0	1	1
chr15_81137281_81137936	chr15	81137281	81137936	Mkl1	-32562	22.905	86.7926	55.253	0	1	1
chr15_81694550_81695050	chr15	81694550	81695050	Chadl	2487	31.8261	21.4608	22.7727	1	0	0
chr15_82266328_82266828	chr15	82266328	82266828	Sept3	-8357	30.6453	35.8896	15.5275	1	1	0
chr15_82271145_82271645	chr15	82271145	82271645	Sept3	-3540	28.978	27.883	38.6057	0	0	1
chr15_83664642_83665142	chr15	83664642	83665142	Scube1	60147	14.6933	31.1718	40.8511	0	1	1
chr15_83667488_83667988	chr15	83667488	83667988	Scube1	57301	21.653	53.859	22.7698	0	1	0
chr15_83691830_83692330	chr15	83691830	83692330	Scube1	32959	45.4038	20.4964	4.99978	1	0	0
chr15_83696812_83697396	chr15	83696812	83697396	Scube1	27935	67.1029	46.9789	22.0764	1	1	0
chr15_83706463_83706963	chr15	83706463	83706963	Scube1	18326	19.7351	62.4567	39.9733	0	1	1
chr15_83706756_83707256	chr15	83706756	83707256	Scube1	18033	12.3911	31.7131	20.6291	0	1	0
chr15_83709301_83709801	chr15	83709301	83709801	Scube1	15488	5.27508	33.541	3.34599	0	1	0
chr15_83740764_83741386	chr15	83740764	83741386	Scube1	-16036	85.0496	56.7288	16.8951	1	1	0
chr15_83746279_83746806	chr15	83746279	83746806	Scube1	-21504	29.4977	144.807	80.516	0	1	1
chr15_84625725_84626225	chr15	84625725	84626225	Prr5	-37231	40.0084	22.0316	15.8742	1	0	0
chr15_84629639_84630139	chr15	84629639	84630139	Prr5	-33317	30.8589	19.6667	28.2815	1	0	0
chr15_84654553_84655053	chr15	84654553	84655053	Prr5	-8403	35.6376	18.3251	9.87567	1	0	0
chr15_84697243_84698109	chr15	84697243	84698109	Prr5	16678	9.67009	92.6367	451.622	0	1	1
chr15_84700270_84700770	chr15	84700270	84700770	Prr5	19522	16.2771	14.5287	36.6465	0	0	1
chr15_84712511_84713011	chr15	84712511	84713011	Arhgap8	-7291	6.25182	29.9485	32.6455	0	0	1
chr15_84898054_84898554	chr15	84898054	84898554	Nup50	-25124	36.3809	25.8687	5.01899	1	0	0
chr15_84924888_84925388	chr15	84924888	84925388	Nup50	1710	34.0412	23.0266	10.5086	1	0	0
chr15_86124303_86124803	chr15	86124303	86124803	Cerk	61588	9.35277	15.3402	32.4035	0	0	1
chr15_86135188_86135688	chr15	86135188	86135688	Cerk	50703	39.9991	37.3596	29.627	1	1	0
chr15_86173707_86174207	chr15	86173707	86174207	Cerk	12184	6.62742	41.5313	41.1949	0	1	1
chr15_92333272_92333772	chr15	92333272	92333772	Pdzrn4	-63288	5.94501	45.9535	6.87638	0	1	0
chr15_92378295_92378855	chr15	92378295	92378855	Pdzrn4	-18235	3.42883	67.9057	11.711	0	1	0
chr15_92570953_92571479	chr15	92570953	92571479	Pdzrn4	-25893	8.57604	37.8266	39.8081	0	1	1
chr15_95809999_95810507	chr15	95809999	95810507	Ano6	19410	3.10582	79.9386	81.6358	0	1	1
chr15_95828902_95829402	chr15	95828902	95829402	Ano6	38309	9.32685	22.8461	52.1135	0	0	1
chr15_95887353_95887853	chr15	95887353	95887853	Ano6	96760	8.34666	45.8404	58.6211	0	1	1
chr15_95931351_95931851	chr15	95931351	95931851	Ano6	140758	89.0081	27.3622	1.95919	1	0	0
chr15_97824963_97825463	chr15	97824963	97825463	Hdac7	6554	28.4055	55.3616	63.4365	0	1	1
chr15_97839905_97840405	chr15	97839905	97840405	Hdac7	4347	51.1464	16.33	16.4274	1	0	0
chr15_97990105_97990605	chr15	97990105	97990605	Col2a1	14369	15.8793	29.7946	64.8838	0	0	1
chr15_97997506_97998006	chr15	97997506	97998006	Col2a1	6968	3.44122	63.8116	106.835	0	1	1
chr15_97997924_97998424	chr15	97997924	97998424	Col2a1	6550	3.29696	46.3611	116.568	0	1	1
chr15_98008784_98009284	chr15	98008784	98009284	Col2a1	-4310	4.82906	82.265	205.22	0	1	1
chr15_98014201_98014701	chr15	98014201	98014701	Col2a1	-9727	2.82636	22.2315	64.0281	0	0	1
chr15_98019958_98020491	chr15	98019958	98020491	Col2a1	-15501	2.28932	42.6892	91.572	0	1	1
chr15_98026417_98026917	chr15	98026417	98026917	Col2a1	-21943	5.11688	70.293	181.08	0	1	1
chr15_98027381_98027881	chr15	98027381	98027881	Col2a1	-22907	5.99967	75.9811	202.733	0	1	1
chr15_98028884_98029384	chr15	98028884	98029384	Col2a1	-24410	5.74594	76.1597	22.5662	0	1	0
chr15_98030807_98031307	chr15	98030807	98031307	Col2a1	-26333	6.71279	51.239	111.829	0	1	1
chr15_98033257_98033757	chr15	98033257	98033757	Col2a1	-28783	3.85345	77.9201	248.237	0	1	1
chr15_98038135_98038635	chr15	98038135	98038635	Col2a1	-33661	1.80145	47.4458	92.2241	0	1	1
chr15_98968970_98969470	chr15	98968970	98969470	Tuba1a	-15719	38.4986	26.9157	5.99858	1	0	0
chr15_99344431_99344931	chr15	99344431	99344931	Fmnl3	25801	30.896	23.7239	6.18298	1	0	0
chr15_99344941_99345441	chr15	99344941	99345441	Fmnl3	25291	26.765	74.6724	70.9486	0	1	1
chr15_99384051_99384551	chr15	99384051	99384551	Tmbim6	-8646	6.75713	48.8944	8.75297	0	1	0
chr15_99416467_99416967	chr15	99416467	99416967	Tmbim6	23498	64.0891	42.6708	19.5064	1	1	0
chr15_99817788_99818288	chr15	99817788	99818288	Lima1	2111	24.7993	43.104	68.007	0	1	1
chr15_99847131_99847631	chr15	99847131	99847631	Lima1	-27232	12.8422	31.4827	19.9962	0	1	0
chr16_4629893_4630393	chr16	4629893	4630393	Pam16	-5197	18.4326	28.3683	48.8472	0	0	1
chr16_4632030_4632530	chr16	4632030	4632530	Pam16	-7334	17.6675	26.4763	44.1144	0	0	1
chr16_8769037_8769537	chr16	8769037	8769537	Usp7	-30945	29.4173	21.8166	34.8909	0	0	1
chr16_17625424_17625924	chr16	17625424	17625924	Smpd4	6320	19.0175	15.4381	31.4623	0	0	1
chr16_21575942_21576442	chr16	21575942	21576442	2510009E07Rik	118473	34.5318	8.00541	1.673	1	0	0
chr16_21727797_21728297	chr16	21727797	21728297	2510009E07Rik	-33382	24.0203	32.656	19.2615	0	1	0
chr16_31880155_31880655	chr16	31880155	31880655	Mfi2	1595	4.25251	30.29	105.328	0	1	1
chr16_31885079_31885579	chr16	31885079	31885579	Mfi2	6519	2.90993	23.1225	84.6572	0	0	1
chr16_31896969_31897469	chr16	31896969	31897469	Mfi2	18409	21.313	29.0034	36.4621	0	0	1
chr16_31898565_31899081	chr16	31898565	31899081	Mfi2	20013	6.21091	39.5921	131.851	0	1	1
chr16_33903776_33904443	chr16	33903776	33904443	Umps	62893	55.3618	45.5284	23.6697	1	1	0
chr16_33904525_33905025	chr16	33904525	33905025	Umps	62228	30.9117	15.5624	3.63219	1	0	0
chr16_33922161_33922661	chr16	33922161	33922661	Umps	44592	14.7876	40.1671	19.7513	0	1	0
chr16_33941288_33941788	chr16	33941288	33941788	Umps	25465	39.1855	13.5349	21.6087	1	0	0
chr16_33966100_33966600	chr16	33966100	33966600	Umps	653	37.0697	31.8314	11.3864	1	1	0
chr16_33996086_33996586	chr16	33996086	33996586	Umps	-29333	27.5024	30.3765	30.7305	0	1	1
chr16_34036420_34036920	chr16	34036420	34036920	Umps	-69667	3.35937	14.1822	56.4333	0	0	1
chr16_34082055_34082555	chr16	34082055	34082555	Umps	-115302	16.1888	20.052	31.2971	0	0	1
chr16_34180294_34180794	chr16	34180294	34180794	Umps	-213541	33.9029	12.9324	3.34599	1	0	0
chr16_34192893_34193393	chr16	34192893	34193393	Umps	-226140	35.0414	26.8453	22.0351	1	0	0
chr16_34231113_34231613	chr16	34231113	34231613	Umps	-264360	34.3372	10.0739	0	1	0	0
chr16_38662561_38663140	chr16	38662561	38663140	Arhgap31	50184	28.2433	108.898	45.7048	0	1	1
chr16_38673440_38673940	chr16	38673440	38673940	Arhgap31	39345	3.39504	14.382	78.287	0	0	1
chr16_38679409_38679909	chr16	38679409	38679909	Arhgap31	33376	30.0864	37.4452	7.75417	1	1	0
chr16_38687614_38688114	chr16	38687614	38688114	Arhgap31	25171	37.0855	53.4849	10.4068	1	1	0
chr16_44630808_44631308	chr16	44630808	44631308	Boc	-72188	38.3046	11.186	5.79498	1	0	0
chr16_44632315_44632815	chr16	44632315	44632815	Boc	-73695	64.1702	40.1904	10.4068	1	1	0
chr16_92157912_92158412	chr16	92157912	92158412	Mrps6	99826	27.5229	31.8649	48.6436	0	1	1
chr16_93884244_93884744	chr16	93884244	93884744	Chaf1b	593	32.3611	29.1411	46.1946	1	0	1
chr16_93906122_93906622	chr16	93906122	93906622	Chaf1b	22471	30.8637	16.6328	33.2179	1	0	1
chr16_94435777_94436277	chr16	94435777	94436277	Pigp	-65012	45.2149	15.8846	7.38538	1	0	0
chr17_4907314_4907814	chr17	4907314	4907814	Arid1b	-87510	42.3916	31.4724	17.261	1	1	0
chr17_4945819_4946319	chr17	4945819	4946319	Arid1b	-49005	27.536	18.1783	46.6844	0	0	1
chr17_4974715_4975215	chr17	4974715	4975215	Arid1b	-20109	6.48465	11.34	37.2189	0	0	1
chr17_4997181_4997681	chr17	4997181	4997681	Arid1b	2357	55.6785	40.7686	29.2995	1	1	0
chr17_5089525_5090025	chr17	5089525	5090025	Arid1b	94701	5.76447	12.6673	43.6026	0	0	1
chr17_7625342_7625883	chr17	7625342	7625883	Fndc1	179361	8.08576	66.3509	25.3427	0	1	0
chr17_7642318_7642863	chr17	7642318	7642863	Fndc1	162383	41.3423	34.5664	19.3825	1	1	0
chr17_7686301_7686801	chr17	7686301	7686801	Fndc1	118423	12.638	38.8704	5.01899	0	1	0
chr17_7713365_7713865	chr17	7713365	7713865	Fndc1	91359	7.21224	31.4511	7.06077	0	1	0
chr17_7821732_7822232	chr17	7821732	7822232	Fndc1	-17008	22.8776	41.4322	17.3849	0	1	0
chr17_7863688_7864188	chr17	7863688	7864188	Fndc1	-58964	22.5439	30.7885	16.2017	0	1	0
chr17_12834756_12835256	chr17	12834756	12835256	Mas1	33137	8.37873	35.384	61.824	0	1	1
chr17_12836266_12837000	chr17	12836266	12837000	Mas1	31510	6.81801	138.262	204.31	0	1	1
chr17_12844599_12845099	chr17	12844599	12845099	Mas1	23294	11.9598	68.3939	54.623	0	1	1
chr17_12845909_12846409	chr17	12845909	12846409	Mas1	21984	19.1779	97.488	227.688	0	1	1
chr17_23790409_23790909	chr17	23790409	23790909	Flywch2	-4582	37.5692	38.9439	17.0987	1	1	0
chr17_24212124_24212624	chr17	24212124	24212624	Ntn3	-2987	25.8803	51.9392	111.469	0	1	1
chr17_24513568_24514068	chr17	24513568	24514068	Traf7	14120	18.4865	11.3094	31.1377	0	0	1
chr17_24524662_24525162	chr17	24524662	24525162	Traf7	3026	64.1159	24.1612	6.57097	1	0	0
chr17_25284974_25285474	chr17	25284974	25285474	Ube2i	-10914	21.0652	31.6101	30.8102	0	1	1
chr17_25575567_25576067	chr17	25575567	25576067	Lmf1	-3357	55.655	6.66089	2.16279	1	0	0
chr17_25575979_25576479	chr17	25575979	25576479	Lmf1	-2945	39.0247	8.85672	1.95919	1	0	0
chr17_25618411_25618911	chr17	25618411	25618911	Lmf1	39487	43.0258	11.5265	6.97818	1	0	0
chr17_26011687_26012187	chr17	26011687	26012187	Rab11fip3	9923	14.0758	18.6778	33.2179	0	0	1
chr17_26041058_26041558	chr17	26041058	26041558	Rab11fip3	-19448	26.998	24.5925	31.4239	0	0	1
chr17_29341501_29342001	chr17	29341501	29342001	Mtch1	6153	29.4819	26.4244	46.3819	0	0	1
chr17_29341815_29342315	chr17	29341815	29342315	Mtch1	5839	52.1911	16.1149	24.2613	1	0	0
chr17_32162050_32162550	chr17	32162050	32162550	Notch3	4552	42.1419	24.8615	41.0547	1	0	1
chr17_34040005_34040505	chr17	34040005	34040505	Col11a2	1117	24.8081	19.2435	58.1697	0	0	1
chr17_34040779_34041279	chr17	34040779	34041279	Col11a2	1891	11.6323	99.7529	296.165	0	1	1
chr17_34052520_34053020	chr17	34052520	34053020	Col11a2	13632	1.00643	14.5981	59.496	0	0	1
chr17_62297321_62297974	chr17	62297321	62297974	Efna5	583669	96.1066	20.843	4.81538	1	0	0
chr17_62423925_62424425	chr17	62423925	62424425	Efna5	457142	36.1052	3.67196	0.489798	1	0	0
chr17_62729749_62730249	chr17	62729749	62730249	Efna5	151318	34.3719	32.7131	26.0553	1	1	0
chr17_62736039_62736539	chr17	62736039	62736539	Efna5	145028	26.6747	81.891	90.7163	0	1	1
chr17_62761101_62761601	chr17	62761101	62761601	Efna5	119966	5.2243	21.1907	44.7666	0	0	1
chr17_62806642_62807142	chr17	62806642	62807142	Efna5	74425	4.14618	33.7408	17.7095	0	1	0
chr17_62836570_62837124	chr17	62836570	62837124	Efna5	44470	3.73616	31.5713	16.9364	0	1	0
chr17_62862511_62863011	chr17	62862511	62863011	Efna5	18556	18.5431	34.6847	101.384	0	1	1
chr17_62940395_62940959	chr17	62940395	62940959	Efna5	-59360	46.0437	10.4256	8.75297	1	0	0
chr17_63075108_63075608	chr17	63075108	63075608	Efna5	-194041	7.70561	63.8494	16.3227	0	1	0
chr17_63076151_63076702	chr17	63076151	63076702	Efna5	-195110	4.92748	71.1929	42.1553	0	1	1
chr17_65761770_65762270	chr17	65761770	65762270	Rab31	10732	2.92216	12.1779	37.9507	0	0	1
chr17_65768395_65768895	chr17	65768395	65768895	Rab31	4107	39.742	24.6924	12.2008	1	0	0
chr17_71038759_71039259	chr17	71038759	71039259	Myom1	19452	36.7558	5.17659	4.32559	1	0	0
chr17_71039905_71040405	chr17	71039905	71040405	Myom1	20598	12.5127	22.9307	56.6177	0	0	1
chr17_71093646_71094146	chr17	71093646	71094146	Myom1	74339	47.1553	8.3205	3.83579	1	0	0
chr17_80167806_80168306	chr17	80167806	80168306	Srsf7	39249	71.2091	49.3552	18.5681	1	1	0
chr18_4980244_4980744	chr18	4980244	4980744	Svil	-66095	34.338	9.18495	2.65259	1	0	0
chr18_5013496_5013996	chr18	5013496	5013996	Svil	-32843	30.6094	32.2503	28.6474	1	1	0
chr18_5097230_5097730	chr18	5097230	5097730	Svil	50891	11.8426	36.7488	46.404	0	1	1
chr18_5124663_5125163	chr18	5124663	5125163	Svil	78324	17.1541	25.5812	30.9341	0	0	1
chr18_5134010_5134510	chr18	5134010	5134510	Svil	87671	19.0321	22.6229	31.4431	0	0	1
chr18_5149813_5150313	chr18	5149813	5150313	Svil	103474	17.2828	33.7787	22.1177	0	1	0
chr18_5155884_5156384	chr18	5155884	5156384	Svil	109545	48.6877	9.15231	0.489798	1	0	0
chr18_5166610_5167110	chr18	5166610	5167110	Svil	120271	55.472	24.8403	2.16279	1	0	0
chr18_33162140_33162640	chr18	33162140	33162640	Stard4	51472	49.7845	7.7048	0.489798	1	0	0
chr18_33200429_33200929	chr18	33200429	33200929	Stard4	13183	30.4579	3.12758	5.06028	1	0	0
chr18_33373754_33374254	chr18	33373754	33374254	Nrep	89630	61.5392	48.1248	22.2829	1	1	0
chr18_34888828_34889328	chr18	34888828	34889328	Egr1	27871	23.8264	26.4274	44.5217	0	0	1
chr18_43321890_43322390	chr18	43321890	43322390	Dpysl3	51132	28.7033	34.7989	17.0987	0	1	0
chr18_43343601_43344101	chr18	43343601	43344101	Dpysl3	29421	4.15943	22.6984	33.5425	0	0	1
chr18_43368180_43368680	chr18	43368180	43368680	Dpysl3	4842	3.75522	35.0251	25.3811	0	1	0
chr18_43421578_43422232	chr18	43421578	43422232	Dpysl3	16381	141.801	50.8946	1.46939	1	1	0
chr18_43493713_43494213	chr18	43493713	43494213	Dpysl3	-55677	72.0303	32.967	18.9753	1	1	0
chr18_43520697_43521197	chr18	43520697	43521197	Dpysl3	-82661	11.8813	41.8286	13.9564	0	1	0
chr18_43523284_43523784	chr18	43523284	43523784	Dpysl3	-85248	32.4876	17.7328	7.07998	1	0	0
chr18_52564180_52564680	chr18	52564180	52564680	Lox	-34563	37.7776	16.0478	0	1	0	0
chr18_58273553_58274096	chr18	58273553	58274096	Fbn2	-63899	3.4936	49.0349	10.1619	0	1	0
chr18_58324337_58324837	chr18	58324337	58324837	Fbn2	-114661	14.8289	38.7399	3.83579	0	1	0
chr18_58325802_58326496	chr18	58325802	58326496	Fbn2	-116223	10.7398	100.274	12.4898	0	1	0
chr18_60606071_60606571	chr18	60606071	60606571	Synpo	3783	42.4215	26.1419	8.24397	1	0	0
chr18_60628328_60628828	chr18	60628328	60628828	Synpo	-4273	44.1281	40.1905	25.2217	1	1	0
chr18_60710583_60711083	chr18	60710583	60711083	Ndst1	2556	36.1058	25.1388	34.646	1	0	1
chr18_60735332_60735832	chr18	60735332	60735832	Ndst1	-22193	30.3956	13.6868	7.75417	1	0	0
chr18_61931584_61932084	chr18	61931584	61932084	Ablim3	-19982	15.2748	23.8952	36.1567	0	0	1
chr18_63184782_63185467	chr18	63184782	63185467	Piezo2	202058	42.6057	79.1059	4.89798	1	1	0
chr18_63199808_63200308	chr18	63199808	63200308	Piezo2	187125	45.4536	8.4143	1.46939	1	0	0
chr18_63201104_63201604	chr18	63201104	63201604	Piezo2	185829	17.1422	21.6464	32.4227	0	0	1
chr18_63241242_63241742	chr18	63241242	63241742	Piezo2	145691	1.75151	17.6573	45.0086	0	0	1
chr18_63244613_63245113	chr18	63244613	63245113	Piezo2	142320	5.0684	46.7353	20.8106	0	1	0
chr18_63277744_63278278	chr18	63277744	63278278	Piezo2	109172	8.8408	96.8152	48.5802	0	1	1
chr18_63278216_63278716	chr18	63278216	63278716	Piezo2	108717	3.96796	30.4388	29.9516	0	1	0
chr18_63495796_63496296	chr18	63495796	63496296	Piezo2	-108863	9.60922	34.7295	7.46797	0	1	0
chr18_63513442_63514161	chr18	63513442	63514161	Piezo2	-126619	12.4693	135.061	158.214	0	1	1
chr18_63529770_63530270	chr18	63529770	63530270	Piezo2	-142837	9.76263	39.5534	20.5273	0	1	0
chr18_69196683_69197183	chr18	69196683	69197183	Tcf4	-147559	33.2452	19.9154	29.8306	1	0	0
chr18_69198411_69198911	chr18	69198411	69198911	Tcf4	-145831	36.9928	19.1712	17.0382	1	0	0
chr18_69351812_69352312	chr18	69351812	69352312	Tcf4	6341	30.6371	41.7677	21.0555	1	1	0
chr18_69415477_69415977	chr18	69415477	69415977	Tcf4	70006	40.8535	13.7235	10.3242	1	0	0
chr18_69462555_69463055	chr18	69462555	69463055	Tcf4	117084	54.9498	4.17554	0.244899	1	0	0
chr18_69500327_69500827	chr18	69500327	69500827	Tcf4	154856	13.2652	32.9699	16.5263	0	1	0
chr18_69507743_69508243	chr18	69507743	69508243	Tcf4	162272	22.0611	31.03	16.5676	0	1	0
chr18_69517170_69517670	chr18	69517170	69517670	Tcf4	171699	56.0215	24.9115	25.626	1	0	0
chr18_69521157_69521657	chr18	69521157	69521657	Tcf4	175686	46.7171	43.5647	13.3648	1	1	0
chr18_69536632_69537132	chr18	69536632	69537132	Tcf4	191161	1.16162	33.6632	85.8625	0	1	1
chr18_69592520_69593020	chr18	69592520	69593020	Tcf4	247049	71.2706	40.4575	24.2805	1	1	0
chr18_69630371_69630871	chr18	69630371	69630871	Tcf4	284900	39.3818	4.81059	2.16279	1	0	0
chr18_69631853_69632353	chr18	69631853	69632353	Tcf4	286382	33.5628	4.64342	0.244899	1	0	0
chr18_69632193_69632693	chr18	69632193	69632693	Tcf4	286722	40.1832	12.7671	2.65259	1	0	0
chr18_75342034_75342534	chr18	75342034	75342534	Smad7	-25081	18.2989	38.1386	41.459	0	1	1
chr18_75343511_75344011	chr18	75343511	75344011	Smad7	-23604	6.79458	41.5098	50.8861	0	1	1
chr18_75387274_75387774	chr18	75387274	75387774	Smad7	20159	15.0762	85.7902	149.846	0	1	1
chr18_75391625_75392125	chr18	75391625	75392125	Smad7	24510	27.8553	42.9674	25.7086	0	1	0
chr18_75392324_75392824	chr18	75392324	75392824	Smad7	25209	14.4619	49.087	90.3446	0	1	1
chr18_75398265_75398765	chr18	75398265	75398765	Smad7	31150	15.2899	33.283	28.4025	0	1	0
chr18_75401912_75402412	chr18	75401912	75402412	Smad7	34797	55.209	41.9031	23.3643	1	1	0
chr18_75434530_75435230	chr18	75434530	75435230	Smad7	67515	55.6372	15.802	17.1592	1	0	0
chr18_80628869_80629369	chr18	80628869	80629369	Nfatc1	79054	29.8184	76.8663	93.4457	0	1	1
chr18_80634283_80634783	chr18	80634283	80634783	Nfatc1	73640	8.18511	12.6244	65.8442	0	0	1
chr18_80635972_80636472	chr18	80635972	80636472	Nfatc1	71951	25.4379	76.1505	67.1926	0	1	1
chr18_80656569_80657069	chr18	80656569	80657069	Nfatc1	51354	4.41715	24.9605	46.9678	0	0	1
chr18_80704726_80705226	chr18	80704726	80705226	Nfatc1	3197	6.99069	21.8787	34.7257	0	0	1
chr19_5911884_5912384	chr19	5911884	5912384	Dpf2	737	45.1688	34.5103	14.2426	1	1	0
chr19_10403040_10403540	chr19	10403040	10403540	Syt7	14200	51.5597	61.0958	17.9544	1	1	0
chr19_21737967_21738601	chr19	21737967	21738601	Tmem2	-40056	140.26	62.6472	9.71336	1	1	0
chr19_21794432_21794932	chr19	21794432	21794932	Tmem2	16342	26.0306	71.9007	29.5444	0	1	0
chr19_21834670_21835310	chr19	21834670	21835310	Tmem2	56650	25.5036	76.0999	24.6493	0	1	0
chr19_21882187_21882981	chr19	21882187	21882981	Tmem2	104244	52.431	96.6074	29.5828	1	1	0
chr19_21897368_21897868	chr19	21897368	21897868	Tmem2	119278	10.1107	39.2639	10.7314	0	1	0
chr19_21897889_21898389	chr19	21897889	21898389	Tmem2	119799	14.5841	35.2148	12.487	0	1	0
chr19_47376164_47376664	chr19	47376164	47376664	Sh3pxd2a	87997	3.07115	28.3174	43.1733	0	0	1
chr19_47379070_47379644	chr19	47379070	47379644	Sh3pxd2a	85054	2.10866	34.2891	220.968	0	1	1
chr19_47381367_47381867	chr19	47381367	47381867	Sh3pxd2a	82794	2.01872	21.8023	74.3273	0	0	1
chr19_47398032_47398555	chr19	47398032	47398555	Sh3pxd2a	66117	65.2211	49.7925	25.3427	1	1	0
chr19_47399651_47400151	chr19	47399651	47400151	Sh3pxd2a	64510	46.7892	25.9177	23.3835	1	0	0
chr19_47414250_47414850	chr19	47414250	47414850	Sh3pxd2a	49861	3.73043	21.3386	134.605	0	0	1
chr19_47421141_47421641	chr19	47421141	47421641	Sh3pxd2a	43020	11.623	28.2502	63.7861	0	0	1
chr19_47422475_47422975	chr19	47422475	47422975	Sh3pxd2a	41686	2.36667	49.4481	133.136	0	1	1
chr19_47443310_47443810	chr19	47443310	47443810	Sh3pxd2a	20851	21.3387	44.7239	43.9301	0	1	1
chr19_47458520_47459108	chr19	47458520	47459108	Sh3pxd2a	5597	21.3823	95.0446	98.9795	0	1	1
chr19_47486005_47486505	chr19	47486005	47486505	Sh3pxd2a	-21844	25.9284	53.2677	25.5463	0	1	0
chr19_53191829_53192329	chr19	53191829	53192329	Add3	48082	35.3727	18.5687	8.85477	1	0	0
chr2_4958015_4958516	chr2	4958015	4958516	Ucma	-17856	2.8106	81.1702	246.498	0	1	1
chr2_4968647_4969147	chr2	4968647	4969147	Ucma	-7225	0.817021	15.485	68.8214	0	0	1
chr2_4977931_4978431	chr2	4977931	4978431	Ucma	2059	7.87836	24.5161	37.3783	0	0	1
chr2_4984057_4984557	chr2	4984057	4984557	Ucma	8185	0.875893	16.3208	45.6223	0	0	1
chr2_6075092_6075592	chr2	6075092	6075592	Proser2	54843	37.8101	4.07357	1.22449	1	0	0
chr2_6081028_6081528	chr2	6081028	6081528	Proser2	48907	7.62082	14.2291	39.9925	0	0	1
chr2_6086534_6087191	chr2	6086534	6087191	Proser2	43322	1.56162	30.8099	65.5609	0	1	1
chr2_6098877_6099377	chr2	6098877	6099377	Proser2	31058	23.8711	52.1188	49.0508	0	1	1
chr2_6121504_6122004	chr2	6121504	6122004	Proser2	8431	0.757631	12.1494	34.7862	0	0	1
chr2_6128727_6129227	chr2	6128727	6129227	Proser2	1208	4.8387	41.7698	123.381	0	1	1
chr2_13575452_13575952	chr2	13575452	13575952	Vim	1391	49.0249	43.5792	29.8114	1	1	0
chr2_27058681_27059181	chr2	27058681	27059181	Tmem8c	8937	15.2955	27.0227	35.0945	0	0	1
chr2_27802472_27802972	chr2	27802472	27802972	Col5a1	-83703	42.6367	15.2934	9.14097	1	0	0
chr2_27813321_27813821	chr2	27813321	27813821	Col5a1	-72854	94.894	42.6769	24.8529	1	1	0
chr2_27818834_27819334	chr2	27818834	27819334	Col5a1	-67341	42.5903	13.8987	8.16137	1	0	0
chr2_27835578_27836078	chr2	27835578	27836078	Col5a1	-50597	34.2625	68.2194	17.528	1	1	0
chr2_27842779_27843279	chr2	27842779	27843279	Col5a1	-43396	36.2776	16.2088	4.57048	1	0	0
chr2_27848386_27848886	chr2	27848386	27848886	Col5a1	-37789	37.6457	7.90865	0	1	0	0
chr2_27939407_27939929	chr2	27939407	27939929	Col5a1	53243	26.1345	163.116	298.56	0	1	1
chr2_28249397_28249897	chr2	28249397	28249897	Olfm1	43958	1.14617	24.7464	85.7136	0	0	1
chr2_28278057_28278557	chr2	28278057	28278557	Olfm1	72618	27.0849	18.2007	36.6465	0	0	1
chr2_28298605_28299105	chr2	28298605	28299105	Olfm1	93166	33.9127	9.98825	7.06077	1	0	0
chr2_28304641_28305141	chr2	28304641	28305141	Olfm1	99202	8.50863	9.57537	36.6465	0	0	1
chr2_30852869_30853369	chr2	30852869	30853369	Prrx2	7752	26.8336	30.6214	44.2355	0	1	1
chr2_33160572_33161072	chr2	33160572	33161072	Angptl2	-55139	21.0794	30.138	31.8119	0	1	1
chr2_33165837_33166337	chr2	33165837	33166337	Angptl2	-49874	23.3725	30.5856	17.1208	0	1	0
chr2_33187740_33188240	chr2	33187740	33188240	Angptl2	-27971	9.93259	61.7105	21.7105	0	1	0
chr2_33205875_33206375	chr2	33205875	33206375	Angptl2	-9836	39.433	13.4604	34.3627	1	0	1
chr2_33223772_33224272	chr2	33223772	33224272	Angptl2	8061	14.1619	69.0027	23.5871	0	1	0
chr2_34646186_34646686	chr2	34646186	34646686	Gapvd1	108796	43.3829	29.0064	34.2801	1	0	1
chr2_35588121_35588621	chr2	35588121	35588621	Dab2ip	5531	7.22373	20.156	50.0938	0	0	1
chr2_35589793_35590293	chr2	35589793	35590293	Dab2ip	7203	18.0224	41.7859	48.5255	0	1	1
chr2_35613779_35614279	chr2	35613779	35614279	Dab2ip	-7952	1.43139	25.6189	33.7903	0	0	1
chr2_35619443_35619943	chr2	35619443	35619943	Dab2ip	-2288	30.6346	17.6889	5.30518	1	0	0
chr2_35649687_35650187	chr2	35649687	35650187	Dab2ip	27956	23.3787	19.9887	30.2791	0	0	1
chr2_35663146_35663646	chr2	35663146	35663646	Dab2ip	-28598	32.269	11.4032	20.7309	1	0	0
chr2_35671901_35672401	chr2	35671901	35672401	Dab2ip	-19843	50.0284	22.6963	16.8154	1	0	0
chr2_35673986_35674486	chr2	35673986	35674486	Dab2ip	-17758	41.2151	9.4602	5.83628	1	0	0
chr2_35676061_35676561	chr2	35676061	35676561	Dab2ip	-15683	8.97483	17.7929	30.0342	0	0	1
chr2_35677725_35678225	chr2	35677725	35678225	Dab2ip	-14019	19.5555	21.8563	34.6652	0	0	1
chr2_35702526_35703026	chr2	35702526	35703026	Dab2ip	6044	2.40109	25.2918	59.4134	0	0	1
chr2_35714682_35715182	chr2	35714682	35715182	Dab2ip	18200	30.1262	17.9193	11.3038	1	0	0
chr2_35749635_35750135	chr2	35749635	35750135	Dab2ip	53153	30.9243	8.28273	1.46939	1	0	0
chr2_38460783_38461283	chr2	38460783	38461283	Nek6	-50664	31.8827	39.7603	25.5463	1	1	0
chr2_38504228_38504728	chr2	38504228	38504728	Nek6	-7219	32.7191	14.9896	12.6906	1	0	0
chr2_38530782_38531282	chr2	38530782	38531282	Nek6	19156	34.1553	21.9827	22.2003	1	0	0
chr2_38645893_38646393	chr2	38645893	38646393	Psmb7	-2237	23.7374	18.9672	43.6247	0	0	1
chr2_45117056_45117556	chr2	45117056	45117556	Zeb2	-4027	34.3618	19.7849	20.1585	1	0	0
chr2_45222138_45222638	chr2	45222138	45222638	Zeb2	-109109	36.1311	19.422	3.42859	1	0	0
chr2_45227229_45227729	chr2	45227229	45227729	Zeb2	-114200	35.8829	34.1965	5.99858	1	1	0
chr2_52318892_52319392	chr2	52318892	52319392	Neb	19656	34.8777	2.0327	2.26459	1	0	0
chr2_60807282_60807782	chr2	60807282	60807782	Rbms1	73906	34.3227	8.25117	3.63219	1	0	0
chr2_60825634_60826134	chr2	60825634	60826134	Rbms1	55554	13.4159	26.297	30.6037	0	0	1
chr2_60842843_60843343	chr2	60842843	60843343	Rbms1	38345	30.2484	9.98925	3.73399	1	0	0
chr2_60905227_60905727	chr2	60905227	60905727	Rbms1	-24039	43.2435	38.3423	9.42717	1	1	0
chr2_60923129_60923629	chr2	60923129	60923629	Rbms1	39825	36.212	17.4544	1.95919	1	0	0
chr2_60940314_60940814	chr2	60940314	60940814	Rbms1	22640	76.8409	31.3674	14.8534	1	1	0
chr2_63702357_63702857	chr2	63702357	63702857	Fign	395431	52.1533	16.9427	20.1585	1	0	0
chr2_63832367_63832867	chr2	63832367	63832867	Fign	265421	4.92324	50.3348	89.2853	0	1	1
chr2_63970146_63970646	chr2	63970146	63970646	Fign	127642	6.18401	34.3992	15.2606	0	1	0
chr2_74686267_74686767	chr2	74686267	74686767	Hoxd11	4194	25.0319	50.1309	32.4035	0	1	1
chr2_76968858_76969358	chr2	76968858	76969358	Ttn	13439	17.2735	20.9919	45.2151	0	0	1
chr2_77048455_77048955	chr2	77048455	77048955	Ttn	-66158	3.91032	56.9579	13.6702	0	1	0
chr2_90866496_90866996	chr2	90866496	90866996	C1qtnf4	-19040	37.5755	25.3101	64.6802	1	0	1
chr2_92012731_92013231	chr2	92012731	92013231	Creb3l1	11189	105.317	54.1353	19.6716	1	1	0
chr2_92023294_92023794	chr2	92023294	92023794	Creb3l1	626	33.2709	20.9521	23.4248	1	0	0
chr2_92047460_92047960	chr2	92047460	92047960	Creb3l1	-23540	1.31462	14.7897	35.6227	0	0	1
chr2_92110797_92111297	chr2	92110797	92111297	Phf21a	-73135	48.6109	8.06665	0	1	0	0
chr2_92486333_92486833	chr2	92486333	92486833	Slc35c1	-26065	29.8793	27.9238	32.3209	0	0	1
chr2_92491971_92492471	chr2	92491971	92492471	Slc35c1	-31703	38.2008	11.6479	2.44899	1	0	0
chr2_92496597_92497097	chr2	92496597	92497097	Slc35c1	-36329	37.9016	18.4219	11.469	1	0	0
chr2_92602004_92602504	chr2	92602004	92602504	Chst1	2547	34.7332	22.3446	5.79498	1	0	0
chr2_93565628_93566128	chr2	93565628	93566128	Alx4	-76556	7.96162	18.8541	43.3769	0	0	1
chr2_93567664_93568164	chr2	93567664	93568164	Alx4	-74520	3.97805	21.001	44.9481	0	0	1
chr2_102450053_102450553	chr2	102450053	102450553	Fjx1	1489	29.0794	29.1482	35.5017	0	0	1
chr2_102507583_102508083	chr2	102507583	102508083	Pamr1	-42188	54.2031	16.7643	1.95919	1	0	0
chr2_102508141_102508641	chr2	102508141	102508641	Pamr1	-41630	38.7687	27.1399	5.38778	1	0	0
chr2_102519942_102520442	chr2	102519942	102520442	Pamr1	-29829	41.7887	28.5264	10.814	1	0	0
chr2_102533325_102533825	chr2	102533325	102533825	Pamr1	-16446	23.6128	42.043	2.44899	0	1	0
chr2_102589979_102590479	chr2	102589979	102590479	Pamr1	40208	30.5808	30.2074	28.4025	1	1	0
chr2_110353382_110354054	chr2	110353382	110354054	Fibin	9275	9.06712	83.2416	70.5136	0	1	1
chr2_110379680_110380180	chr2	110379680	110380180	Fibin	-16937	10.047	30.7761	22.4039	0	1	0
chr2_110392506_110393006	chr2	110392506	110393006	Fibin	-29763	39.8281	10.7977	2.93879	1	0	0
chr2_110411367_110411867	chr2	110411367	110411867	Fibin	-48624	31.641	13.4136	6.97818	1	0	0
chr2_110472429_110472929	chr2	110472429	110472929	Fibin	-109686	43.0713	20.2813	2.65259	1	0	0
chr2_113757456_113757956	chr2	113757456	113757956	Grem1	942	30.5099	21.4791	33.3197	1	0	1
chr2_120539753_120540253	chr2	120539753	120540253	Zfp106	23828	66.6337	11.0494	1.1832	1	0	0
chr2_125420562_125421062	chr2	125420562	125421062	Fbn1	85626	34.5487	24.5965	21.5069	1	0	0
chr2_125428887_125429435	chr2	125428887	125429435	Fbn1	77277	15.1956	55.1004	66.7249	0	1	1
chr2_125436184_125436684	chr2	125436184	125436684	Fbn1	70004	18.4794	57.9438	23.5045	0	1	0
chr2_125452622_125453122	chr2	125452622	125453122	Fbn1	53566	36.6577	29.9495	30.6863	1	0	1
chr2_125492170_125492846	chr2	125492170	125492846	Fbn1	13930	19.2055	65.2795	76.3306	0	1	1
chr2_125650063_125650563	chr2	125650063	125650563	Eid1	-22787	31.5888	4.0899	0	1	0	0
chr2_125659927_125660427	chr2	125659927	125660427	Eid1	-12923	46.0947	31.134	26.3002	1	1	0
chr2_125660397_125660897	chr2	125660397	125660897	Eid1	-12453	20.158	35.7163	37.2573	0	1	1
chr2_127722241_127722896	chr2	127722241	127722896	Mall	7328	26.351	61.3589	148.762	0	1	1
chr2_127742730_127743230	chr2	127742730	127743230	Mall	-13083	1.42315	11.1626	37.6424	0	0	1
chr2_127744189_127744727	chr2	127744189	127744727	Mall	-14561	1.48105	42.9033	126.826	0	1	1
chr2_128139752_128140252	chr2	128139752	128140252	Bcl2l11	12427	31.3794	12.1026	3.18369	1	0	0
chr2_128179809_128180309	chr2	128179809	128180309	Bcl2l11	52484	5.33207	12.0699	38.1572	0	0	1
chr2_128189661_128190161	chr2	128189661	128190161	Bcl2l11	62336	26.0425	29.1167	42.4607	0	0	1
chr2_128190155_128190655	chr2	128190155	128190655	Bcl2l11	62830	5.61251	31.3451	16.3227	0	1	0
chr2_128233240_128233740	chr2	128233240	128233740	Bcl2l11	105915	3.15771	28.6334	44.1721	0	0	1
chr2_128861603_128862103	chr2	128861603	128862103	Fbln7	-2079	0.773082	20.1662	68.6178	0	0	1
chr2_128875386_128875886	chr2	128875386	128875886	Fbln7	11704	1.37921	23.199	58.6816	0	0	1
chr2_128892092_128892592	chr2	128892092	128892592	Fbln7	28410	56.7369	16.9234	12.0798	1	0	0
chr2_128916539_128917039	chr2	128916539	128917039	Zc3h8	27231	0.876411	25.4692	40.6475	0	0	1
chr2_128948141_128948641	chr2	128948141	128948641	Zc3h8	-4371	31.1079	29.7731	16.6915	1	0	0
chr2_131189725_131190225	chr2	131189725	131190225	Cdc25b	3027	36.9416	1.08671	2.16279	1	0	0
chr2_131190248_131190748	chr2	131190248	131190748	Cdc25b	3550	46.5292	8.84039	3.42859	1	0	0
chr2_132315970_132316470	chr2	132315970	132316470	Cds2	30281	35.4691	31.4754	29.9929	1	1	0
chr2_143980757_143981257	chr2	143980757	143981257	Rrbp1	30256	25.9039	16.013	37.5022	0	0	1
chr2_144017956_144018456	chr2	144017956	144018456	Rrbp1	-6943	1.53472	16.6308	53.701	0	0	1
chr2_151605440_151606002	chr2	151605440	151606002	Snph	26872	6.76086	95.0238	203.556	0	1	1
chr2_152820254_152820754	chr2	152820254	152820754	Bcl2l1	10213	13.0351	15.7561	34.6844	0	0	1
chr2_152820939_152821439	chr2	152820939	152821439	Bcl2l1	9528	24.2449	36.2424	47.7466	0	1	1
chr2_153003629_153004129	chr2	153003629	153004129	Pdrg1	11504	4.03096	38.533	39.9867	0	1	1
chr2_153009260_153009886	chr2	153009260	153009886	Pdrg1	5810	3.09979	21.4996	100.793	0	0	1
chr2_155047326_155047826	chr2	155047326	155047826	Ahcy	26921	30.6123	12.9772	5.30518	1	0	0
chr2_155385007_155385507	chr2	155385007	155385507	Trp53inp2	3401	32.634	28.923	66.5981	1	0	1
chr2_157458444_157458944	chr2	157458444	157458944	Src	34401	36.1382	27.8912	44.2355	1	0	1
chr2_157463248_157463748	chr2	157463248	157463748	Src	39205	17.4439	32.7253	26.3607	0	1	0
chr2_157464718_157465218	chr2	157464718	157465218	Src	40675	82.8888	40.0468	24.5667	1	1	0
chr2_157481168_157481668	chr2	157481168	157481668	Src	57125	35.0667	8.13287	3.77529	1	0	0
chr2_157506771_157507271	chr2	157506771	157507271	Nnat	-53057	51.1497	34.2301	19.2615	1	1	0
chr2_157552386_157552886	chr2	157552386	157552886	Nnat	-7442	19.2377	52.4197	34.6873	0	1	1
chr2_157555969_157556469	chr2	157555969	157556469	Nnat	-3859	46.7672	32.8344	18.8956	1	1	0
chr2_164414079_164414579	chr2	164414079	164414579	Matn4	-9169	15.9219	31.3267	27.6457	0	1	0
chr2_164436388_164436888	chr2	164436388	164436888	Sdc4	6550	4.03946	22.154	61.2103	0	0	1
chr2_164436885_164437385	chr2	164436885	164437385	Sdc4	6053	10.389	60.3811	121.386	0	1	1
chr2_164448717_164449217	chr2	164448717	164449217	Sdc4	-5779	7.75805	41.1122	31.9905	0	1	1
chr2_164449524_164450090	chr2	164449524	164450090	Sdc4	-6619	2.32053	67.0697	112.094	0	1	1
chr2_164531089_164531589	chr2	164531089	164531589	Wfdc2	-31377	53.9844	39.6227	28.8923	1	1	0
chr2_164563235_164563735	chr2	164563235	164563735	Wfdc2	769	29.8743	52.0025	55.6602	0	1	1
chr2_164563725_164564225	chr2	164563725	164564225	Wfdc2	1259	35.2104	44.8208	25.6894	1	1	0
chr2_167129544_167130044	chr2	167129544	167130044	Kcnb1	59024	27.0314	30.9056	8.48887	0	1	0
chr2_167162513_167163232	chr2	167162513	167163232	Kcnb1	25945	16.7534	77.1323	202.323	0	1	1
chr2_167233683_167234183	chr2	167233683	167234183	Ptgis	6604	42.4204	16.325	4.61178	1	0	0
chr2_167239168_167239668	chr2	167239168	167239668	Ptgis	1119	58.1093	19.4638	10.3242	1	0	0
chr2_167244093_167244593	chr2	167244093	167244593	Ptgis	-3806	31.0144	2.11835	0.489798	1	0	0
chr2_167250542_167251042	chr2	167250542	167251042	Ptgis	-10255	31.4058	14.0578	11.7936	1	0	0
chr2_167261072_167261572	chr2	167261072	167261572	Ptgis	-20785	11.8678	57.5503	126.38	0	1	1
chr2_167267926_167268426	chr2	167267926	167268426	Ptgis	-27639	55.682	2.08777	12.6522	1	0	0
chr2_167279113_167279613	chr2	167279113	167279613	Ptgis	-38826	24.81	23.9828	38.8477	0	0	1
chr2_167291995_167292495	chr2	167291995	167292495	Ptgis	-51708	49.18	5.92587	5.59138	1	0	0
chr2_168712719_168713219	chr2	168712719	168713219	Atp9a	21370	39.8527	16.9855	8.79427	1	0	0
chr2_172758471_172758971	chr2	172758471	172758971	Bmp7	181600	23.9965	22.3926	42.8487	0	0	1
chr2_172789371_172789871	chr2	172789371	172789871	Bmp7	150700	9.01802	48.8138	41.2141	0	1	1
chr2_172790160_172790660	chr2	172790160	172790660	Bmp7	149911	6.31123	34.6399	31.1569	0	1	1
chr2_172799786_172800286	chr2	172799786	172800286	Bmp7	140285	2.76259	20.4557	34.0323	0	0	1
chr2_172811155_172811655	chr2	172811155	172811655	Bmp7	128916	44.4436	13.4645	5.59138	1	0	0
chr2_172827471_172827971	chr2	172827471	172827971	Bmp7	112600	10.5874	10.9363	40.8069	0	0	1
chr2_172831700_172832200	chr2	172831700	172832200	Bmp7	108371	26.7812	36.4147	45.094	0	1	1
chr2_172839239_172839739	chr2	172839239	172839739	Bmp7	100832	8.58952	16.9163	41.2967	0	0	1
chr2_172846037_172846537	chr2	172846037	172846537	Bmp7	94034	17.4628	69.0196	53.6789	0	1	1
chr2_172848330_172848844	chr2	172848330	172848844	Bmp7	91734	15.2248	65.7483	104.425	0	1	1
chr2_172851657_172852157	chr2	172851657	172852157	Bmp7	88414	14.7218	31.1718	38.4434	0	1	1
chr2_172861531_172862031	chr2	172861531	172862031	Bmp7	78540	15.385	30.7008	65.4975	0	1	1
chr2_172863074_172863574	chr2	172863074	172863574	Bmp7	76997	45.4226	51.6436	20.5273	1	1	0
chr2_172867219_172867818	chr2	172867219	172867818	Bmp7	72802	47.2722	19.5524	103.652	1	0	1
chr2_172901263_172901763	chr2	172901263	172901763	Bmp7	38808	9.83241	36.0506	42.9284	0	1	1
chr2_172903574_172904209	chr2	172903574	172904209	Bmp7	36429	4.45067	102.48	176.876	0	1	1
chr2_172931445_172931945	chr2	172931445	172931945	Bmp7	8626	62.1652	7.73126	1.4281	1	0	0
chr2_172958474_172958974	chr2	172958474	172958974	Bmp7	-18403	4.70816	26.6027	67.861	0	0	1
chr2_172996188_172996688	chr2	172996188	172996688	Rae1	-3679	28.1856	52.5224	30.9341	0	1	1
chr2_173730347_173730934	chr2	173730347	173730934	Vapb	-6930	21.2034	38.0926	46.8055	0	1	1
chr2_173790157_173790657	chr2	173790157	173790657	Vapb	52836	44.0472	27.2643	31.4652	1	0	1
chr2_173801372_173801872	chr2	173801372	173801872	Vapb	64051	50.49	30.0912	9.63077	1	1	0
chr2_173810145_173810688	chr2	173810145	173810688	Vapb	72846	64.0546	22.835	3.91838	1	0	0
chr2_173845219_173845952	chr2	173845219	173845952	Vapb	108015	6.78311	79.105	53.5195	0	1	1
chr2_179443373_179443873	chr2	179443373	179443873	Cdh4	1192	36.0525	26.2602	20.2411	1	0	0
chr2_180600677_180601177	chr2	180600677	180601177	Col9a3	2705	11.1024	47.77	103	0	1	1
chr2_180604729_180605229	chr2	180604729	180605229	Col9a3	6757	9.37905	114.341	296.834	0	1	1
chr2_180611687_180612285	chr2	180611687	180612285	Col9a3	13764	2.55908	90.0821	291.636	0	1	1
chr3_9523566_9524066	chr3	9523566	9524066	Zfp704	86269	32.3166	16.2169	37.2131	1	0	1
chr3_9569094_9569594	chr3	9569094	9569594	Zfp704	40741	4.09952	36.486	13.7115	0	1	0
chr3_9573486_9573986	chr3	9573486	9573986	Zfp704	36349	28.3998	57.1241	44.2355	0	1	1
chr3_9608280_9608780	chr3	9608280	9608780	Zfp704	1555	47.3718	23.0439	8.89607	1	0	0
chr3_37654157_37654689	chr3	37654157	37654689	Spry1	14476	26.0769	27.5946	31.0964	0	0	1
chr3_54392343_54392843	chr3	54392343	54392843	Postn	31486	3.11458	23.5954	34.9322	0	0	1
chr3_54413200_54413700	chr3	54413200	54413700	Postn	52343	40.9407	35.2862	11.59	1	1	0
chr3_54432601_54433101	chr3	54432601	54433101	Postn	71744	40.88	18.8552	0.979596	1	0	0
chr3_55213856_55214356	chr3	55213856	55214356	Dclk1	-28420	17.0156	56.1771	18.5681	0	1	0
chr3_55373620_55374120	chr3	55373620	55374120	Dclk1	-87888	75.2759	30.9272	14.8534	1	1	0
chr3_55495796_55496296	chr3	55495796	55496296	Dclk1	34288	34.1418	20.5414	5.30518	1	0	0
chr3_55511575_55512095	chr3	55511575	55512095	Dclk1	50077	58.2058	47.6121	8.16137	1	1	0
chr3_55520445_55520945	chr3	55520445	55520945	Dclk1	58937	31.9473	36.7806	28.3641	1	1	0
chr3_55534661_55535161	chr3	55534661	55535161	Dclk1	73153	15.2252	36.4607	20.2824	0	1	0
chr3_55542227_55542727	chr3	55542227	55542727	Dclk1	80719	37.1978	23.8503	28.1989	1	0	0
chr3_55587800_55588300	chr3	55587800	55588300	Dclk1	126292	30.4982	14.0934	9.77387	1	0	0
chr3_55599601_55600101	chr3	55599601	55600101	Dclk1	138093	50.5544	28.8965	10.6517	1	0	0
chr3_55600240_55600740	chr3	55600240	55600740	Dclk1	138732	57.4999	24.5191	19.6303	1	0	0
chr3_66105450_66105950	chr3	66105450	66105950	Ptx3	-114187	37.2838	10.0128	2.85619	1	0	0
chr3_66131445_66131945	chr3	66131445	66131945	Ptx3	-88192	36.7851	2.32427	2.85619	1	0	0
chr3_66172688_66173472	chr3	66172688	66173472	Ptx3	-46807	72.1906	46.5548	8.24397	1	1	0
chr3_66215670_66216170	chr3	66215670	66216170	Ptx3	-3967	54.2338	33.2474	7.06077	1	1	0
chr3_83689053_83689553	chr3	83689053	83689553	Sfrp2	-77018	20.3167	55.2044	32.1144	0	1	1
chr3_83689456_83689956	chr3	83689456	83689956	Sfrp2	-76615	5.83518	66.6363	59.108	0	1	1
chr3_83710928_83711428	chr3	83710928	83711428	Sfrp2	-55143	9.43551	52.5787	36.8885	0	1	1
chr3_83733034_83733534	chr3	83733034	83733534	Sfrp2	-33037	37.6692	3.68011	1.1832	1	0	0
chr3_83734002_83734502	chr3	83734002	83734502	Sfrp2	-32069	44.9769	9.33788	1.95919	1	0	0
chr3_83768388_83768888	chr3	83768388	83768888	Sfrp2	2317	29.2388	31.6713	39.7063	0	1	1
chr3_83797795_83798295	chr3	83797795	83798295	Sfrp2	31724	14.2427	21.7238	32.3209	0	0	1
chr3_87972225_87972725	chr3	87972225	87972725	Nes	1382	52.8322	8.36739	9.87567	1	0	0
chr3_87983206_87983706	chr3	87983206	87983706	Nes	12363	64.2069	12.6163	8.93737	1	0	0
chr3_89087553_89088053	chr3	89087553	89088053	Rusc1	2228	29.0213	99.6991	227.765	0	1	1
chr3_89953425_89953925	chr3	89953425	89953925	Atp8b2	9657	27.5928	43.7503	52.1327	0	1	1
chr3_95161159_95161659	chr3	95161159	95161659	Sema6c	989	46.8679	47.7771	25.8738	1	1	0
chr3_95499827_95500327	chr3	95499827	95500327	Ctsk	867	41.103	31.0259	15.7119	1	1	0
chr3_107743050_107743550	chr3	107743050	107743550	Csf1	17169	4.39498	18.7512	31.0935	0	0	1
chr3_107769618_107770118	chr3	107769618	107770118	Csf1	-9399	6.73277	32.5206	28.1163	0	1	0
chr3_107810658_107811158	chr3	107810658	107811158	Csf1	-50439	24.1688	33.4797	6.89558	0	1	0
chr3_108287825_108288325	chr3	108287825	108288325	Sort1	4011	23.4221	27.5415	73.7991	0	0	1
chr3_108306277_108306920	chr3	108306277	108306920	Sort1	22535	6.27951	110.795	150.947	0	1	1
chr3_131208415_131208915	chr3	131208415	131208915	Hadh	63436	0.329152	29.6325	75.6728	0	0	1
chr3_131245662_131246162	chr3	131245662	131246162	Hadh	26189	20.2098	27.2654	33.9113	0	0	1
chr3_137785208_137785708	chr3	137785208	137785708	H2afz	-79029	37.0039	27.3866	17.3849	1	0	0
chr3_144020360_144020860	chr3	144020360	144020860	Lmo4	181722	6.46219	14.5695	55.6439	0	0	1
chr3_144107696_144108196	chr3	144107696	144108196	Lmo4	94386	30.8995	15.4952	12.0798	1	0	0
chr3_144207504_144208004	chr3	144207504	144208004	Lmo4	-2499	17.9158	30.1176	19.4651	0	1	0
chr3_144238434_144238934	chr3	144238434	144238934	Lmo4	-33429	1.32134	20.9806	84.8387	0	0	1
chr3_144241991_144242491	chr3	144241991	144242491	Lmo4	-36986	16.8197	30.6977	22.2195	0	1	0
chr3_144289379_144289879	chr3	144289379	144289879	Lmo4	-84374	6.12881	56.9325	103.528	0	1	1
chr3_144307341_144307854	chr3	144307341	144307854	Lmo4	-102343	3.01062	32.7183	46.8852	0	1	1
chr3_144367438_144367945	chr3	144367438	144367945	Lmo4	-162437	21.6847	18.8929	35.3365	0	0	1
chr3_144377554_144378054	chr3	144377554	144378054	Lmo4	-172549	17.7263	50.4642	116.177	0	1	1
chr3_145941916_145942416	chr3	145941916	145942416	2410004B18Rik	4134	36.7089	22.7676	24.0769	1	0	0
chr4_8666650_8667150	chr4	8666650	8667150	Chd7	-23506	22.9809	19.4199	41.6626	0	0	1
chr4_8750783_8751283	chr4	8750783	8751283	Chd7	60627	35.3544	7.28069	3.14239	1	0	0
chr4_8799474_8799974	chr4	8799474	8799974	Chd7	109318	64.3672	27.0594	9.54817	1	0	0
chr4_8826127_8826627	chr4	8826127	8826627	Chd7	135971	8.53513	32.701	31.0935	0	1	1
chr4_8850368_8850868	chr4	8850368	8850868	Chd7	160212	61.7319	16.5563	23.7523	1	0	0
chr4_8876550_8877050	chr4	8876550	8877050	Chd7	186394	5.09019	16.3677	52.5841	0	0	1
chr4_8938916_8939463	chr4	8938916	8939463	Chd7	248784	38.107	15.5604	21.6279	1	0	0
chr4_8945044_8945544	chr4	8945044	8945544	Chd7	254888	9.81378	44.4121	51.252	0	1	1
chr4_8957692_8958192	chr4	8957692	8958192	Chd7	267536	43.8733	4.6975	0.979596	1	0	0
chr4_8963010_8963511	chr4	8963010	8963511	Chd7	272855	8.90184	34.3064	19.1405	0	1	0
chr4_41289753_41290253	chr4	41289753	41290253	Ubap2	-14868	6.02599	69.4804	140.667	0	1	1
chr4_45083432_45083932	chr4	45083432	45083932	Fbxo10	922	44.1263	24.6037	3.63219	1	0	0
chr4_55480392_55480892	chr4	55480392	55480892	Klf4	51833	35.9365	28.9932	47.785	1	0	1
chr4_55586271_55586793	chr4	55586271	55586793	Klf4	-54057	3.54305	37.5167	11.8762	0	1	0
chr4_55645388_55645888	chr4	55645388	55645888	Klf4	-113163	74.0855	45.7401	14.7323	1	1	0
chr4_55648354_55648854	chr4	55648354	55648854	Klf4	-116129	3.86567	69.1796	87.3703	0	1	1
chr4_55726075_55726575	chr4	55726075	55726575	Klf4	-193850	6.00333	33.7059	62.3935	0	1	1
chr4_55749910_55750410	chr4	55749910	55750410	Klf4	-217685	32.1461	3.67196	1.95919	1	0	0
chr4_55894449_55894949	chr4	55894449	55894949	Klf4	-362224	34.8064	15.1119	4.32559	1	0	0
chr4_56004224_56004724	chr4	56004224	56004724	Klf4	-471999	6.70547	40.0121	40.5649	0	1	1
chr4_58471242_58471868	chr4	58471242	58471868	Lpar1	27848	12.1539	124.674	135.807	0	1	1
chr4_58497144_58497644	chr4	58497144	58497644	Lpar1	2009	17.0995	33.1689	6.52968	0	1	0
chr4_58501360_58501860	chr4	58501360	58501860	Lpar1	-2207	38.8592	21.9512	5.79498	1	0	0
chr4_58516318_58516818	chr4	58516318	58516818	Lpar1	-17165	34.6082	20.5811	2.20409	1	0	0
chr4_58516672_58517172	chr4	58516672	58517172	Lpar1	-17519	42.637	19.5759	1.22449	1	0	0
chr4_58546455_58546955	chr4	58546455	58546955	Lpar1	6588	37.5381	9.41328	0.979596	1	0	0
chr4_58568428_58568928	chr4	58568428	58568928	Lpar1	-15187	34.7593	18.2027	1.95919	1	0	0
chr4_58573993_58574493	chr4	58573993	58574493	Lpar1	-20752	5.67469	33.8672	7.75417	0	1	0
chr4_58578418_58578918	chr4	58578418	58578918	Lpar1	-25177	33.336	4.13679	2.85619	1	0	0
chr4_58605896_58606396	chr4	58605896	58606396	Lpar1	-52655	35.8671	8.03915	0.489798	1	0	0
chr4_58631312_58631812	chr4	58631312	58631812	Lpar1	-78071	37.5235	7.05845	1.1832	1	0	0
chr4_58643390_58643890	chr4	58643390	58643890	Lpar1	-90149	30.6122	7.5753	3.10109	1	0	0
chr4_58663560_58664060	chr4	58663560	58664060	Lpar1	-110319	45.0165	20.7788	1.46939	1	0	0
chr4_63201012_63201512	chr4	63201012	63201512	Col27a1	-14150	1.41594	25.9177	90.3091	0	0	1
chr4_63205485_63205985	chr4	63205485	63205985	Col27a1	-9677	0.875893	16.0049	67.3107	0	0	1
chr4_63226811_63227311	chr4	63226811	63227311	Col27a1	11649	43.1119	60.0844	26.0582	1	1	0
chr4_63228941_63229441	chr4	63228941	63229441	Col27a1	13779	25.1292	100.971	219.876	0	1	1
chr4_63963267_63963767	chr4	63963267	63963767	Tnc	83498	9.78301	19.7105	31.4623	0	0	1
chr4_63983025_63983525	chr4	63983025	63983525	Tnc	63740	35.895	6.15523	1.1832	1	0	0
chr4_64002143_64002643	chr4	64002143	64002643	Tnc	44622	33.5452	1.85432	0.489798	1	0	0
chr4_64028573_64029073	chr4	64028573	64029073	Tnc	18192	5.61869	56.9438	21.1381	0	1	0
chr4_64037396_64037896	chr4	64037396	64037896	Tnc	9369	3.73668	61.6879	55.4595	0	1	1
chr4_64058741_64059241	chr4	64058741	64059241	Tnc	-11976	41.5721	8.10443	0.489798	1	0	0
chr4_64065233_64065733	chr4	64065233	64065733	Tnc	-18468	59.945	51.8752	14.3636	1	1	0
chr4_64076353_64076853	chr4	64076353	64076853	Tnc	-29588	52.5449	16.9672	1.71429	1	0	0
chr4_64078032_64078532	chr4	64078032	64078532	Tnc	-31267	36.4267	6.68531	1.673	1	0	0
chr4_64129268_64129768	chr4	64129268	64129768	Tnc	-82503	35.6359	20.3517	2.85619	1	0	0
chr4_64142309_64142809	chr4	64142309	64142809	Tnc	-95544	69.692	18.6981	11.469	1	0	0
chr4_64200073_64200573	chr4	64200073	64200573	Tnc	-153308	33.4164	5.65166	3.63219	1	0	0
chr4_64238242_64238742	chr4	64238242	64238742	Tnc	-191477	26.1566	75.7773	23.3009	0	1	0
chr4_64250592_64251125	chr4	64250592	64251125	Tnc	-203844	38.0849	24.3345	14.4462	1	0	0
chr4_64258498_64259006	chr4	64258498	64259006	Tnc	-211737	4.62802	37.8308	6.83508	0	1	0
chr4_64268843_64269360	chr4	64268843	64269360	Tnc	-222087	19.2046	43.8247	17.4262	0	1	0
chr4_64269394_64269894	chr4	64269394	64269894	Tnc	-222629	9.44777	34.6794	15.6706	0	1	0
chr4_64269877_64270437	chr4	64269877	64270437	Tnc	-223142	10.0675	57.6797	36.5447	0	1	1
chr4_64296791_64297391	chr4	64296791	64297391	Tnc	-250076	7.13395	118.483	111.829	0	1	1
chr4_64306809_64307309	chr4	64306809	64307309	Tnc	-260044	6.19695	56.8938	26.4846	0	1	0
chr4_64346551_64347051	chr4	64346551	64347051	Tnc	-299786	44.8501	16.6492	2.65259	1	0	0
chr4_64407688_64408203	chr4	64407688	64408203	Tnc	-360931	6.25816	59.9052	11.7523	0	1	0
chr4_64437701_64438461	chr4	64437701	64438461	Tnc	-391066	154.871	76.0692	14.5287	1	1	0
chr4_64492512_64493012	chr4	64492512	64493012	Tnc	-445747	31.5699	30.7924	11.0176	1	1	0
chr4_82289572_82290072	chr4	82289572	82290072	Nfib	215957	8.37911	41.9909	22.0764	0	1	0
chr4_82310996_82311496	chr4	82310996	82311496	Nfib	194533	33.8761	11.0301	5.26388	1	0	0
chr4_82338465_82338965	chr4	82338465	82338965	Nfib	167064	14.844	30.1412	6.48838	0	1	0
chr4_82344690_82345190	chr4	82344690	82345190	Nfib	160839	28.7824	39.7165	32.3593	0	1	1
chr4_82364958_82365458	chr4	82364958	82365458	Nfib	140571	16.8938	44.9401	43.2146	0	1	1
chr4_82368779_82369279	chr4	82368779	82369279	Nfib	136750	8.30192	51.2911	24.8913	0	1	0
chr4_82386203_82386703	chr4	82386203	82386703	Nfib	119326	29.3503	32.9659	10.6104	0	1	0
chr4_82463885_82464385	chr4	82463885	82464385	Nfib	41644	31.6314	22.5352	5.10158	1	0	0
chr4_82464240_82464740	chr4	82464240	82464740	Nfib	41289	52.2183	20.79	6.24348	1	0	0
chr4_97193174_97193674	chr4	97193174	97193674	Nfia	-388519	21.6092	34.5367	9.34457	0	1	0
chr4_97237097_97237597	chr4	97237097	97237597	Nfia	-344596	12.0446	40.8451	9.18227	0	1	0
chr4_97465650_97466260	chr4	97465650	97466260	Nfia	-115988	5.10867	43.157	115.217	0	1	1
chr4_97486456_97486956	chr4	97486456	97486956	Nfia	-95237	13.396	49.9016	39.2549	0	1	1
chr4_97575438_97575938	chr4	97575438	97575938	Nfia	-6255	45.1555	51.2727	18.6507	1	1	0
chr4_97689867_97690368	chr4	97689867	97690368	Nfia	-87508	53.3698	37.4248	16.6502	1	1	0
chr4_97695441_97696063	chr4	97695441	97696063	Nfia	-81874	60.2763	58.1773	27.1396	1	1	0
chr4_97751870_97752370	chr4	97751870	97752370	Nfia	-25506	32.4494	28.5202	21.9746	1	0	0
chr4_97757092_97757592	chr4	97757092	97757592	Nfia	-20284	35.1786	22.7524	16.1191	1	0	0
chr4_97774951_97775451	chr4	97774951	97775451	Nfia	-2425	57.318	34.701	16.8125	1	1	0
chr4_97844778_97845278	chr4	97844778	97845278	Nfia	67402	36.4444	43.9431	10.814	1	1	0
chr4_97895828_97896328	chr4	97895828	97896328	Nfia	118452	12.0643	37.2996	7.87518	0	1	0
chr4_97926888_97927388	chr4	97926888	97927388	Nfia	149512	20.688	30.8711	5.34648	0	1	0
chr4_98040150_98040650	chr4	98040150	98040650	Nfia	262774	9.98328	31.6204	2.85619	0	1	0
chr4_105842151_105842747	chr4	105842151	105842747	Usp24	-473764	8.90922	72.441	43.0494	0	1	1
chr4_105861245_105861745	chr4	105861245	105861745	Usp24	-454718	87.638	71.0575	24.1979	1	1	0
chr4_105904512_105905012	chr4	105904512	105905012	Usp24	-411451	7.15764	58.9762	10.4068	0	1	0
chr4_105904925_105905425	chr4	105904925	105905425	Usp24	-411038	5.81716	41.5615	4.02018	0	1	0
chr4_105909423_105909923	chr4	105909423	105909923	Usp24	-406540	5.4586	51.1891	38.6028	0	1	1
chr4_105939588_105940088	chr4	105939588	105940088	Usp24	-376375	31.546	5.66591	2.16279	1	0	0
chr4_105945081_105945581	chr4	105945081	105945581	Usp24	-370882	1.90381	38.2138	35.5017	0	1	1
chr4_105994331_105994831	chr4	105994331	105994831	Usp24	-321632	9.0686	45.6464	64.9664	0	1	1
chr4_106026001_106026501	chr4	106026001	106026501	Usp24	-289962	36.0941	32.9415	5.10158	1	1	0
chr4_106028177_106028677	chr4	106028177	106028677	Usp24	-287786	6.69002	39.0284	12.487	0	1	0
chr4_106040227_106040727	chr4	106040227	106040727	Usp24	-275736	1.33679	25.3549	43.9272	0	0	1
chr4_106066990_106067490	chr4	106066990	106067490	Usp24	-248973	4.225	24.6831	48.9874	0	0	1
chr4_106096086_106096586	chr4	106096086	106096586	Usp24	-219877	8.53838	35.8162	10.1206	0	1	0
chr4_106100104_106100604	chr4	106100104	106100604	Usp24	-215859	10.0601	35.3535	12.8337	0	1	0
chr4_106129306_106129806	chr4	106129306	106129806	Usp24	-186657	45.7098	49.7395	11.5074	1	1	0
chr4_106150802_106151302	chr4	106150802	106151302	Usp24	-165161	8.12541	36.8651	16.2017	0	1	0
chr4_106200181_106200681	chr4	106200181	106200681	Usp24	-115782	40.0284	15.4207	10.814	1	0	0
chr4_106225388_106225888	chr4	106225388	106225888	Usp24	-90575	37.6353	33.0974	13.0181	1	1	0
chr4_106228487_106228987	chr4	106228487	106228987	Usp24	-87476	26.3387	26.2032	35.6256	0	0	1
chr4_106232384_106232900	chr4	106232384	106232900	Usp24	-83571	4.6275	57.2047	177.393	0	1	1
chr4_106378803_106379392	chr4	106378803	106379392	Usp24	62885	67.4582	9.8466	2.75439	1	0	0
chr4_116483501_116484001	chr4	116483501	116484001	Mast2	-19570	58.2896	19.318	3.83579	1	0	0
chr4_116668158_116668658	chr4	116668158	116668658	Akr1a1	-16734	14.2695	37.851	22.0793	0	1	0
chr4_118261623_118262123	chr4	118261623	118262123	Ptprf	29524	4.72348	13.702	48.5005	0	0	1
chr4_118281907_118282407	chr4	118281907	118282407	Ptprf	9240	2.04324	13.6307	30.0534	0	0	1
chr4_118306145_118306645	chr4	118306145	118306645	Ptprf	-14998	36.8608	17.1517	11.0176	1	0	0
chr4_121028631_121029131	chr4	121028631	121029131	Col9a2	-10685	13.3284	20.7818	31.421	0	0	1
chr4_129544430_129544930	chr4	129544430	129544930	Hdac1	-2034	0.876411	8.31026	33.4599	0	0	1
chr4_130264643_130265143	chr4	130264643	130265143	Serinc2	10327	16.8874	19.7849	37.1363	0	0	1
chr4_130273551_130274051	chr4	130273551	130274051	Serinc2	1419	32.2676	26.2378	9.67207	1	0	0
chr4_130282832_130283332	chr4	130282832	130283332	Serinc2	-7496	32.6012	1.08671	0.979596	1	0	0
chr4_130937603_130938103	chr4	130937603	130938103	Matn1	-6532	4.51496	63.8246	193.119	0	1	1
chr4_130947293_130947793	chr4	130947293	130947793	Matn1	3158	28.8819	32.5806	19.1789	0	1	0
chr4_133301763_133302263	chr4	133301763	133302263	Tmem222	-24223	33.8829	31.3093	26.4846	1	1	0
chr4_133307317_133307817	chr4	133307317	133307817	Tmem222	-29777	14.3872	14.0007	30.4827	0	0	1
chr4_134365224_134365724	chr4	134365224	134365724	Extl1	7073	2.85691	70.401	190.023	0	1	1
chr4_134365610_134366110	chr4	134365610	134366110	Extl1	6687	4.31139	31.182	69.7376	0	1	1
chr4_134368000_134368500	chr4	134368000	134368500	Extl1	4297	4.04683	81.5442	86.6769	0	1	1
chr4_134388325_134388825	chr4	134388325	134388825	Pafah2	-7745	24.3039	24.8901	36.7675	0	0	1
chr4_134480718_134481218	chr4	134480718	134481218	Stmn1	12648	22.5235	20.3435	37.0153	0	0	1
chr4_135025693_135026193	chr4	135025693	135026193	Runx3	-94702	12.4382	40.1365	36.0741	0	1	1
chr4_135051351_135051851	chr4	135051351	135051851	Runx3	-69044	4.45437	34.9559	15.3432	0	1	0
chr4_135067056_135067556	chr4	135067056	135067556	Runx3	-53339	30.5452	20.5025	22.6901	1	0	0
chr4_135079843_135080343	chr4	135079843	135080343	Runx3	-40552	23.3513	47.0432	35.1329	0	1	1
chr4_135095553_135096053	chr4	135095553	135096053	Runx3	-24842	2.9351	41.8595	29.6049	0	1	0
chr4_135124579_135125079	chr4	135124579	135125079	Runx3	4184	0.876411	23.2898	107.644	0	0	1
chr4_135128808_135129308	chr4	135128808	135129308	Runx3	8413	41.1788	50.0289	29.9545	1	1	0
chr4_135136696_135137196	chr4	135136696	135137196	Runx3	16301	4.76807	32.911	15.3432	0	1	0
chr4_135140564_135141064	chr4	135140564	135141064	Runx3	20169	13.1391	25.8382	76.3691	0	0	1
chr4_135150352_135150852	chr4	135150352	135150852	Runx3	29957	26.4614	36.9519	55.8062	0	1	1
chr4_135152645_135153145	chr4	135152645	135153145	Runx3	32250	25.3825	30.8252	40.5015	0	1	1
chr4_135166805_135167305	chr4	135166805	135167305	Runx3	46410	20.1913	55.605	99.6095	0	1	1
chr4_135172811_135173311	chr4	135172811	135173311	Runx3	52416	1.8169	11.657	55.1704	0	0	1
chr4_135179860_135180360	chr4	135179860	135180360	Runx3	59465	6.08738	43.9206	122.099	0	1	1
chr4_135191497_135191997	chr4	135191497	135191997	Runx3	71102	3.09633	21.3181	49.048	0	0	1
chr4_135772652_135773152	chr4	135772652	135773152	Myom3	13187	36.4204	1.77275	3.83579	1	0	0
chr4_135780198_135780698	chr4	135780198	135780698	Myom3	20733	3.94946	12.8671	47.0561	0	0	1
chr4_135960675_135961175	chr4	135960675	135961175	Gale	-4240	25.3063	28.6436	48.3574	0	0	1
chr4_137462129_137462651	chr4	137462129	137462651	Hspg2	-6413	1.90962	27.0921	97.342	0	0	1
chr4_137473957_137474457	chr4	137473957	137474457	Hspg2	5404	13.7426	60.6851	157.697	0	1	1
chr4_137476285_137476785	chr4	137476285	137476785	Hspg2	7732	34.1394	18.2252	20.4034	1	0	0
chr4_137476929_137477429	chr4	137476929	137477429	Hspg2	8376	37.7781	26.1277	17.916	1	0	0
chr4_137480724_137481224	chr4	137480724	137481224	Hspg2	12171	4.78028	31.338	32.7473	0	1	1
chr4_137482155_137482655	chr4	137482155	137482655	Hspg2	13602	6.61488	38.1569	72.6956	0	1	1
chr4_137494974_137495474	chr4	137494974	137495474	Hspg2	26421	44.8739	22.9573	31.5862	1	0	1
chr4_137498081_137498581	chr4	137498081	137498581	Hspg2	29528	41.843	19.0631	23.6697	1	0	0
chr4_137748739_137749239	chr4	137748739	137749239	Alpl	17486	6.90792	15.0884	49.579	0	0	1
chr4_137771266_137771766	chr4	137771266	137771766	Alpl	-5041	46.5345	5.19901	9.91696	1	0	0
chr4_156188619_156189119	chr4	156188619	156189119	Agrn	8619	5.30901	25.7403	57.6578	0	0	1
chr5_21486784_21487284	chr5	21486784	21487284	Lrrc17	-56493	42.7801	18.2385	0.489798	1	0	0
chr5_21490128_21490628	chr5	21490128	21490628	Lrrc17	-53149	32.7019	13.2861	4.81538	1	0	0
chr5_21492029_21492529	chr5	21492029	21492529	Lrrc17	-51248	24.5582	42.7391	5.14288	0	1	0
chr5_21496288_21496788	chr5	21496288	21496788	Lrrc17	-46989	51.5226	14.4645	4.36688	1	0	0
chr5_21556418_21557037	chr5	21556418	21557037	Lrrc17	13201	3.23336	33.9773	108.547	0	1	1
chr5_21565639_21566139	chr5	21565639	21566139	Lrrc17	22362	5.188	57.1782	68.0262	0	1	1
chr5_21588162_21588662	chr5	21588162	21588662	Lrrc17	44885	41.6316	7.34799	1.46939	1	0	0
chr5_21591965_21592473	chr5	21591965	21592473	Lrrc17	48692	26.0253	30.19	22.6901	0	1	0
chr5_29708197_29708697	chr5	29708197	29708697	Dnajb6	-27451	23.2978	24.7983	62.8036	0	0	1
chr5_32197647_32198147	chr5	32197647	32198147	Plb1	-34811	22.5144	26.4457	39.5027	0	0	1
chr5_32303142_32303642	chr5	32303142	32303642	Plb1	-50188	26.7049	32.7192	67.8034	0	1	1
chr5_32346133_32346633	chr5	32346133	32346633	Plb1	-7197	14.2351	17.1895	45.0748	0	0	1
chr5_33228318_33228818	chr5	33228318	33228818	Spon2	-10330	13.4961	47.6926	32.1394	0	1	1
chr5_33234268_33234768	chr5	33234268	33234768	Spon2	-16280	40.1812	31.5672	14.1792	1	1	0
chr5_33239176_33239676	chr5	33239176	33239676	Spon2	-21188	21.0991	35.5278	23.5487	0	1	0
chr5_33697972_33698472	chr5	33697972	33698472	Fgfr3	-23502	2.74549	28.7526	89.7722	0	0	1
chr5_33716498_33717148	chr5	33716498	33717148	Fgfr3	-4901	5.59516	47.5152	149.035	0	1	1
chr5_33723126_33723626	chr5	33723126	33723626	Fgfr3	1070	19.7393	59.0905	109.733	0	1	1
chr5_33737827_33738327	chr5	33737827	33738327	Fgfr3	15771	19.3464	31.9547	27.7091	0	1	0
chr5_40952888_40953388	chr5	40952888	40953388	Rab28	754553	42.5924	25.301	22.6075	1	0	0
chr5_41165866_41166558	chr5	41165866	41166558	Rab28	541479	3.58065	102.745	142.296	0	1	1
chr5_41187627_41188205	chr5	41187627	41188205	Rab28	519775	4.22094	21.0673	35.6477	0	0	1
chr5_41296906_41297406	chr5	41296906	41297406	Rab28	410535	6.30247	30.5122	31.7485	0	1	1
chr5_41370230_41370730	chr5	41370230	41370730	Rab28	337211	3.7137	12.7794	35.1137	0	0	1
chr5_41392099_41392599	chr5	41392099	41392599	Rab28	315342	1.31982	34.3451	37.0921	0	1	1
chr5_41392825_41393325	chr5	41392825	41393325	Rab28	314616	4.70045	77.9182	84.4699	0	1	1
chr5_41518983_41519520	chr5	41518983	41519520	Rab28	188439	2.50021	35.2269	87.621	0	1	1
chr5_41562272_41562772	chr5	41562272	41562772	Rab28	145169	25.4391	68.9922	26.6056	0	1	0
chr5_41596397_41596897	chr5	41596397	41596897	Rab28	111044	4.25351	20.894	36.4429	0	0	1
chr5_41598959_41599459	chr5	41598959	41599459	Rab28	108482	6.57222	45.4528	60.5169	0	1	1
chr5_41694207_41694707	chr5	41694207	41694707	Rab28	13234	1.16735	18.8286	71.1628	0	0	1
chr5_53412296_53412796	chr5	53412296	53412796	Rbpj	-143233	38.2731	6.27964	0	1	0	0
chr5_53468381_53468881	chr5	53468381	53468881	Rbpj	-87148	31.1196	4.02873	3.59089	1	0	0
chr5_53497074_53497574	chr5	53497074	53497574	Rbpj	-58455	21.1748	96.8151	74.4761	0	1	1
chr5_53508347_53508942	chr5	53508347	53508942	Rbpj	-47134	3.07061	61.0256	13.7115	0	1	0
chr5_53517675_53518175	chr5	53517675	53518175	Rbpj	-37854	12.1375	84.5913	57.46	0	1	1
chr5_53535043_53535543	chr5	53535043	53535543	Rbpj	-20486	32.3662	10.6998	2.06099	1	0	0
chr5_53546629_53547178	chr5	53546629	53547178	Rbpj	-8875	1.98437	41.9458	29.2169	0	1	0
chr5_53564208_53564708	chr5	53564208	53564708	Rbpj	8679	22.5788	39.5719	27.5439	0	1	0
chr5_53565249_53565749	chr5	53565249	53565749	Rbpj	9720	23.2905	34.9141	5.79498	0	1	0
chr5_64737948_64738448	chr5	64737948	64738448	Klf3	-65325	10.4389	40.9155	27.9319	0	1	0
chr5_64811140_64811640	chr5	64811140	64811640	Klf3	7867	18.9738	52.2972	45.4023	0	1	1
chr5_64811501_64812001	chr5	64811501	64812001	Klf3	8228	26.6335	48.1421	50.4184	0	1	1
chr5_64819304_64819804	chr5	64819304	64819804	Klf3	16031	1.8732	26.614	89.1864	0	0	1
chr5_64821283_64821783	chr5	64821283	64821783	Klf3	18010	2.03804	8.40005	37.0124	0	0	1
chr5_64862168_64862668	chr5	64862168	64862668	Klf3	58895	31.7852	6.67514	3.34599	1	0	0
chr5_64864615_64865115	chr5	64864615	64865115	Klf3	61342	1.95347	53.6306	96.8109	0	1	1
chr5_66654209_66654709	chr5	66654209	66654709	Uchl1	-21662	67.5468	23.7973	23.8733	1	0	0
chr5_66720809_66721309	chr5	66720809	66721309	Limch1	-24781	35.5648	4.77499	0	1	0	0
chr5_66730845_66731345	chr5	66730845	66731345	Limch1	-14745	35.2785	23.3752	10.3655	1	0	0
chr5_66772516_66773016	chr5	66772516	66773016	Limch1	26926	10.717	42.4945	25.0565	0	1	0
chr5_66834630_66835193	chr5	66834630	66835193	Limch1	89072	49.0377	25.3856	7.95777	1	0	0
chr5_66866906_66867541	chr5	66866906	66867541	Limch1	-101192	10.9597	134.863	68.5986	0	1	1
chr5_66886630_66887156	chr5	66886630	66887156	Limch1	-81523	8.63284	70.2643	50.1101	0	1	1
chr5_66943459_66943959	chr5	66943459	66943959	Limch1	-24707	11.0308	30.7762	21.0171	0	1	0
chr5_66958054_66958554	chr5	66958054	66958554	Limch1	-10112	7.52849	42.0979	26.7679	0	1	0
chr5_66959791_66960291	chr5	66959791	66960291	Limch1	-8375	34.2197	47.4448	20.3621	1	1	0
chr5_66969249_66969749	chr5	66969249	66969749	Limch1	1083	13.5007	28.3887	42.7277	0	0	1
chr5_67011344_67011949	chr5	67011344	67011949	Limch1	43231	2.26083	34.7713	46.7065	0	1	1
chr5_67016384_67016884	chr5	67016384	67016884	Limch1	48218	48.5625	38.5135	23.3009	1	1	0
chr5_67024204_67025021	chr5	67024204	67025021	Limch1	56197	16.6497	125.165	252.117	0	1	1
chr5_75148779_75149279	chr5	75148779	75149279	Pdgfra	-3222	48.7842	35.1036	22.9129	1	1	0
chr5_75149831_75150331	chr5	75149831	75150331	Pdgfra	-2170	26.3154	45.4558	62.3138	0	1	1
chr5_75835510_75836010	chr5	75835510	75836010	Kdr	142668	35.7953	15.3503	10.1206	1	0	0
chr5_75862535_75863035	chr5	75862535	75863035	Kdr	115643	23.5911	16.641	31.0551	0	0	1
chr5_76048474_76048974	chr5	76048474	76048974	Kdr	-70296	32.9845	9.98217	2.65259	1	0	0
chr5_77367582_77368082	chr5	77367582	77368082	Igfbp7	40213	8.27374	43.7433	36.8914	0	1	1
chr5_77406421_77406921	chr5	77406421	77406921	Igfbp7	1374	17.8351	49.2899	38.6086	0	1	1
chr5_77407184_77407684	chr5	77407184	77407684	Igfbp7	611	24.2537	47.1765	41.4042	0	1	1
chr5_77433510_77434010	chr5	77433510	77434010	Igfbp7	-25715	8.05881	20.5759	75.7611	0	0	1
chr5_91465058_91465558	chr5	91465058	91465558	Parm1	-52392	25.155	16.6083	32.3593	0	0	1
chr5_110869104_110869604	chr5	110869104	110869604	Ttc28	-10449	30.7452	26.2949	13.0594	1	0	0
chr5_110928239_110928739	chr5	110928239	110928739	Ttc28	48686	88.8458	63.9757	22.038	1	1	0
chr5_112227284_112227784	chr5	112227284	112227784	Miat	1414	50.1402	46.1348	27.8935	1	1	0
chr5_112237423_112237923	chr5	112237423	112237923	Miat	-8725	46.4758	10.2238	12.7732	1	0	0
chr5_112848831_112849331	chr5	112848831	112849331	Myo18b	47281	18.2628	26.3061	44.3593	0	0	1
chr5_112853099_112853609	chr5	112853099	112853609	Myo18b	43008	128.364	58.3197	23.5266	1	1	0
chr5_112876893_112877393	chr5	112876893	112877393	Myo18b	19219	30.2884	16.7062	22.935	1	0	0
chr5_112877399_112877899	chr5	112877399	112877899	Myo18b	18713	15.2886	40.5484	114.507	0	1	1
chr5_112886643_112887143	chr5	112886643	112887143	Myo18b	9469	12.3022	7.82508	35.2597	0	0	1
chr5_113476680_113477180	chr5	113476680	113477180	Wscd2	-73490	14.6294	70.4745	167.025	0	1	1
chr5_113503070_113503570	chr5	113503070	113503570	Wscd2	-47100	22.4846	32.24	24.1403	0	1	0
chr5_113510265_113510765	chr5	113510265	113510765	Wscd2	-39905	1.97813	10.2828	39.1118	0	0	1
chr5_113510627_113511127	chr5	113510627	113511127	Wscd2	-39543	0.5914	16.3117	70.1093	0	0	1
chr5_113570253_113570753	chr5	113570253	113570753	Wscd2	20083	42.0863	14.4197	7.67158	1	0	0
chr5_113591800_113592300	chr5	113591800	113592300	Wscd2	41630	41.2772	17.7347	8.24397	1	0	0
chr5_113789374_113789874	chr5	113789374	113789874	Tmem119	10728	45.1207	16.3352	52.1932	1	0	1
chr5_113796685_113797185	chr5	113796685	113797185	Tmem119	3417	45.0288	44.6861	23.6284	1	1	0
chr5_113808183_113808683	chr5	113808183	113808683	Tmem119	-8081	30.4895	19.0396	5.79498	1	0	0
chr5_114644805_114645311	chr5	114644805	114645311	Trpv4	13363	2.96005	43.2162	149.109	0	1	1
chr5_114647540_114648040	chr5	114647540	114648040	Trpv4	10631	20.472	53.8894	68.8848	0	1	1
chr5_114651001_114651501	chr5	114651001	114651501	Trpv4	7170	5.30271	58.9591	252.296	0	1	1
chr5_114664698_114665198	chr5	114664698	114665198	Trpv4	-6527	17.1381	109.123	250.782	0	1	1
chr5_115272078_115272578	chr5	115272078	115272578	Rnf10	567	38.0923	31.6631	17.0574	1	1	0
chr5_120028551_120029051	chr5	120028551	120029051	Rbm19	-87712	50.3987	8.32865	1.91789	1	0	0
chr5_120030825_120031325	chr5	120030825	120031325	Rbm19	-85438	48.7824	12.8916	0	1	0	0
chr5_120102673_120103173	chr5	120102673	120103173	Rbm19	-13590	43.3023	43.0643	21.9141	1	1	0
chr5_121584155_121584655	chr5	121584155	121584655	Aldh2	9419	27.4573	27.8658	52.2758	0	0	1
chr5_121712172_121712672	chr5	121712172	121712672	Atxn2	813	37.8704	26.7271	33.0335	1	0	1
chr5_121713159_121713659	chr5	121713159	121713659	Atxn2	1800	40.5196	27.1502	17.1813	1	0	0
chr5_122235053_122235553	chr5	122235053	122235553	Hvcn1	25016	9.8086	39.4597	18.0562	0	1	0
chr5_122439439_122439939	chr5	122439439	122439939	Anapc7	17245	32.5908	2.04087	0	1	0	0
chr5_123015905_123016405	chr5	123015905	123016405	Orai1	1081	15.6015	46.4101	11.8762	0	1	0
chr5_123030218_123030834	chr5	123030218	123030834	Orai1	15452	2.4727	35.8192	61.1335	0	1	1
chr5_123954757_123955257	chr5	123954757	123955257	Hip1r	-18621	1.42263	30.6672	82.5933	0	1	1
chr5_123973895_123974395	chr5	123973895	123974395	Hip1r	517	25.591	42.3069	35.2981	0	1	1
chr5_123975729_123976229	chr5	123975729	123976229	Hip1r	2351	1.69864	15.75	41.2141	0	0	1
chr5_123981174_123981674	chr5	123981174	123981674	Hip1r	7796	1.64898	20.5402	56.6811	0	0	1
chr5_125304414_125304914	chr5	125304414	125304914	Scarb1	36430	32.3468	26.5109	18.3232	1	0	0
chr5_125327541_125328041	chr5	125327541	125328041	Scarb1	13303	42.0269	28.823	19.8723	1	0	0
chr5_134719982_134720482	chr5	134719982	134720482	Eln	27091	22.0004	42.9123	24.3631	0	1	0
chr5_134750415_134750915	chr5	134750415	134750915	Eln	-3342	12.2057	42.4629	28.6887	0	1	0
chr5_134761367_134761867	chr5	134761367	134761867	Eln	-14294	22.336	41.1966	37.2794	0	1	1
chr5_134761695_134762195	chr5	134761695	134762195	Eln	-14622	7.67834	33.0025	34.2388	0	1	1
chr5_134772542_134773042	chr5	134772542	134773042	Eln	-25469	21.5602	123.504	88.0253	0	1	1
chr5_134776546_134777046	chr5	134776546	134777046	Eln	-29473	30.4439	44.4323	7.01947	1	1	0
chr5_134779071_134779571	chr5	134779071	134779571	Eln	-31998	7.20924	41.1396	31.7293	0	1	1
chr5_134790476_134790976	chr5	134790476	134790976	Eln	-43403	19.7779	48.3091	22.0793	0	1	0
chr5_135855110_135855610	chr5	135855110	135855610	Hspb1	-32559	35.3417	21.2609	36.4429	1	0	1
chr5_135877714_135878214	chr5	135877714	135878214	Hspb1	-9955	38.2655	24.3641	26.7295	1	0	0
chr5_136802769_136803269	chr5	136802769	136803269	Col26a1	80088	63.7929	17.4045	6.59018	1	0	0
chr5_136804173_136804673	chr5	136804173	136804673	Col26a1	78684	15.4491	39.7147	79.9792	0	1	1
chr5_136806332_136806832	chr5	136806332	136806832	Col26a1	76525	40.4924	6.84644	2.89749	1	0	0
chr5_136818145_136818645	chr5	136818145	136818645	Col26a1	64712	13.1909	40.427	13.3043	0	1	0
chr5_136863898_136864398	chr5	136863898	136864398	Col26a1	18959	51.416	23.9196	37.4859	1	0	1
chr5_136869650_136870411	chr5	136869650	136870411	Col26a1	13076	121.796	42.9409	29.2582	1	1	0
chr5_136886880_136887380	chr5	136886880	136887380	Col26a1	-3915	52.4691	12.704	0.489798	1	0	0
chr5_137759911_137760411	chr5	137759911	137760411	Tsc22d4	14192	12.6404	87.6332	248.034	0	1	1
chr5_139406841_139407341	chr5	139406841	139407341	C130050O18Rik	704	5.28284	41.0622	119.589	0	1	1
chr5_139409325_139409825	chr5	139409325	139409825	C130050O18Rik	3188	5.52457	37.117	56.5822	0	1	1
chr5_144214422_144214922	chr5	144214422	144214922	Tecpr1	8906	18.316	17.2384	31.421	0	0	1
chr5_147860933_147861433	chr5	147860933	147861433	Pomp	555	41.8108	37.4953	16.8951	1	1	0
chr6_4417158_4417692	chr6	4417158	4417692	Col1a2	-88193	56.886	80.8216	25.2793	1	1	0
chr6_4436432_4436932	chr6	4436432	4436932	Col1a2	-68936	60.8343	84.1776	17.7921	1	1	0
chr6_4457441_4457986	chr6	4457441	4457986	Col1a2	-47904	98.3695	108.684	28.1163	1	1	0
chr6_4488273_4488773	chr6	4488273	4488773	Col1a2	-17095	61.3348	43.775	8.93737	1	1	0
chr6_4489312_4489812	chr6	4489312	4489812	Col1a2	-16056	49.306	11.5092	5.30518	1	0	0
chr6_4506113_4506613	chr6	4506113	4506613	Col1a2	745	39.048	33.5653	22.1177	1	1	0
chr6_6879900_6880400	chr6	6879900	6880400	Dlx5	1918	7.9478	16.3005	44.0703	0	0	1
chr6_6909457_6909957	chr6	6909457	6909957	Dlx5	-27639	28.5983	38.328	16.6915	0	1	0
chr6_6915101_6915601	chr6	6915101	6915601	Dlx5	-33283	19.9688	23.2427	30.5653	0	0	1
chr6_14898135_14898635	chr6	14898135	14898635	Foxp2	-2964	12.8733	58.6142	81	0	1	1
chr6_15229320_15230006	chr6	15229320	15230006	Foxp2	44157	8.8338	88.9515	46.1121	0	1	1
chr6_15321379_15321956	chr6	15321379	15321956	Foxp2	136162	42.0115	20.6646	2.44899	1	0	0
chr6_54943627_54944127	chr6	54943627	54944127	Nod1	27784	3.85133	12.7692	38.8285	0	0	1
chr6_54944889_54945409	chr6	54944889	54945409	Nod1	26512	0.394267	11.1015	109.87	0	0	1
chr6_72601677_72602177	chr6	72601677	72602177	Retsat	3299	25.9936	25.1817	32.8491	0	0	1
chr6_83000049_83000589	chr6	83000049	83000589	Dok1	33152	6.77631	128.985	263.049	0	1	1
chr6_83016981_83017672	chr6	83016981	83017672	Dok1	16144	12.8406	85.3019	99.8986	0	1	1
chr6_83027612_83028112	chr6	83027612	83028112	Dok1	5609	12.1255	106.917	210.771	0	1	1
chr6_84511651_84512151	chr6	84511651	84512151	Cyp26b1	81909	8.41384	39.529	16.9143	0	1	0
chr6_84514571_84515071	chr6	84514571	84515071	Cyp26b1	78989	6.46047	16.5981	31.5065	0	0	1
chr6_84577799_84578299	chr6	84577799	84578299	Cyp26b1	15761	2.9042	35.5186	110.729	0	1	1
chr6_84579487_84579987	chr6	84579487	84579987	Cyp26b1	14073	4.86409	14.4207	51.4172	0	0	1
chr6_84580362_84580862	chr6	84580362	84580862	Cyp26b1	13198	6.86794	65.828	125.038	0	1	1
chr6_84775759_84776259	chr6	84775759	84776259	Cyp26b1	-182101	4.93548	28.9026	39.6871	0	0	1
chr6_88886392_88886892	chr6	88886392	88886892	Podxl2	-11598	34.0141	2.55261	0.489798	1	0	0
chr6_97277884_97278384	chr6	97277884	97278384	Lmod3	-25354	45.9608	44.942	29.9766	1	1	0
chr6_97312184_97312684	chr6	97312184	97312684	Lmod3	-59654	39.4802	41.8716	29.5031	1	1	0
chr6_98693183_98693833	chr6	98693183	98693833	Foxp1	334790	35.0974	73.226	23.6697	1	1	0
chr6_98743890_98744390	chr6	98743890	98744390	Foxp1	284158	6.43101	48.8056	29.7893	0	1	0
chr6_98769347_98769865	chr6	98769347	98769865	Foxp1	258692	40.7295	67.826	9.67207	1	1	0
chr6_98769981_98770481	chr6	98769981	98770481	Foxp1	258067	26.6933	69.459	18.1993	0	1	0
chr6_98893080_98893680	chr6	98893080	98893680	Foxp1	134918	7.49277	123.463	160.275	0	1	1
chr6_98921784_98922284	chr6	98921784	98922284	Foxp1	106264	11.5412	38.1366	6.08118	0	1	0
chr6_98970862_98971362	chr6	98970862	98971362	Foxp1	57186	40.9837	58.1189	18.5873	1	1	0
chr6_98972307_98972807	chr6	98972307	98972807	Foxp1	55741	9.25841	113.6	94.1449	0	1	1
chr6_99063963_99064463	chr6	99063963	99064463	Foxp1	-35915	57.2713	51.3533	7.65237	1	1	0
chr6_99065926_99066426	chr6	99065926	99066426	Foxp1	-37878	29.0031	34.2138	17.9765	0	1	0
chr6_99146212_99146738	chr6	99146212	99146738	Foxp1	-118177	3.88207	32.295	22.1177	0	1	0
chr6_99159998_99160498	chr6	99159998	99160498	Foxp1	106267	38.3335	72.6449	24.2613	1	1	0
chr6_99273033_99273533	chr6	99273033	99273533	Foxp1	-6768	3.80765	35.6623	54.5404	0	1	1
chr6_99295908_99296408	chr6	99295908	99296408	Foxp1	-29643	5.31133	18.585	36.7291	0	0	1
chr6_99337501_99338001	chr6	99337501	99338001	Foxp1	-71236	5.64614	35.6867	13.5492	0	1	0
chr6_99376492_99376992	chr6	99376492	99376992	Foxp1	58603	8.10014	49.6234	43.5862	0	1	1
chr6_99474928_99475428	chr6	99474928	99475428	Foxp1	-39833	15.0966	35.8163	12.1624	0	1	0
chr6_99511716_99512216	chr6	99511716	99512216	Foxp1	9027	30.7119	13.5216	1.95919	1	0	0
chr6_128032189_128032689	chr6	128032189	128032689	Tspan9	111139	34.2409	26.8953	25.9948	1	0	0
chr6_128033087_128033587	chr6	128033087	128033587	Tspan9	110241	45.147	10.7304	2.55079	1	0	0
chr6_128053299_128053799	chr6	128053299	128053799	Tspan9	90029	39.2888	6.72813	1.91789	1	0	0
chr6_128070062_128070562	chr6	128070062	128070562	Tspan9	73266	44.1432	20.2466	11.469	1	0	0
chr6_128078460_128078960	chr6	128078460	128078960	Tspan9	64868	45.3577	10.3614	4.61178	1	0	0
chr6_128089511_128090087	chr6	128089511	128090087	Tspan9	53779	58.0218	54.5021	29.7509	1	1	0
chr6_143859596_143860096	chr6	143859596	143860096	Sox5	87260	38.7322	36.22	5.38778	1	1	0
chr6_143895161_143895661	chr6	143895161	143895661	Sox5	51695	2.19623	30.1728	6.44708	0	1	0
chr6_144043352_144043852	chr6	144043352	144043852	Sox5	-96496	2.5259	33.967	35.7466	0	1	1
chr6_144047053_144047553	chr6	144047053	144047553	Sox5	-100197	4.78352	36.3922	24.6877	0	1	0
chr6_144056680_144057441	chr6	144056680	144057441	Sox5	-109955	12.8224	165.989	300.51	0	1	1
chr6_144074785_144075284	chr6	144074785	144075284	Sox5	-127929	82.9604	78.0764	24.9355	1	1	0
chr6_144082146_144082646	chr6	144082146	144082646	Sox5	127172	0.817021	55.2423	181.653	0	1	1
chr6_144098120_144098620	chr6	144098120	144098620	Sox5	111198	9.40433	19.0163	60.0684	0	0	1
chr6_144129848_144130348	chr6	144129848	144130348	Sox5	79470	0.438206	37.0151	126.666	0	1	1
chr6_144166161_144166687	chr6	144166161	144166687	Sox5	43144	26.6531	45.572	79.4922	0	1	1
chr6_144169815_144170315	chr6	144169815	144170315	Sox5	39503	3.9625	40.0692	43.3769	0	1	1
chr6_144264417_144264921	chr6	144264417	144264921	Sox5	-55101	28.1655	43.3425	26.1571	0	1	0
chr6_144312418_144313091	chr6	144312418	144313091	Sox5	-103187	8.03936	52.4908	15.7504	0	1	0
chr6_144318152_144318652	chr6	144318152	144318652	Sox5	-108834	4.85715	48.1838	37.7471	0	1	1
chr6_144367725_144368225	chr6	144367725	144368225	Sox5	-158407	3.67677	56.3727	4.61178	0	1	0
chr6_146221344_146221844	chr6	146221344	146221844	Itpr2	280629	8.47823	34.6083	25.8709	0	1	0
chr6_146271071_146271571	chr6	146271071	146271571	Itpr2	230902	40.3215	18.6044	13.9564	1	0	0
chr6_146272203_146272703	chr6	146272203	146272703	Itpr2	229770	19.7976	31.4347	24.6493	0	1	0
chr6_146283880_146284380	chr6	146283880	146284380	Itpr2	218093	8.74564	28.7089	43.908	0	0	1
chr6_146324592_146325092	chr6	146324592	146325092	Itpr2	177381	34.49	4.75867	1.673	1	0	0
chr6_146399828_146400359	chr6	146399828	146400359	Itpr2	102129	1.64898	61.5036	161.698	0	1	1
chr6_146404106_146404606	chr6	146404106	146404606	Itpr2	97867	13.0167	36.4084	45.2535	0	1	1
chr6_146430761_146431261	chr6	146430761	146431261	Itpr2	71212	3.61835	13.4584	39.5027	0	0	1
chr6_146452375_146452875	chr6	146452375	146452875	Itpr2	49598	8.83557	30.6774	21.2812	0	1	0
chr6_146468867_146469569	chr6	146468867	146469569	Itpr2	33005	4.04013	39.9428	168.186	0	1	1
chr7_4514292_4514792	chr7	4514292	4514792	Tnnt1	1433	34.3579	8.84245	3.63219	1	0	0
chr7_4940138_4940638	chr7	4940138	4940638	Ssc5d	14544	26.3251	31.918	36.9932	0	1	1
chr7_17050921_17051421	chr7	17050921	17051421	Hif3a	5508	13.3376	22.3884	36.5255	0	0	1
chr7_17059953_17060453	chr7	17059953	17060453	Hif3a	2224	28.3948	29.2838	42.6451	0	0	1
chr7_17066361_17066861	chr7	17066361	17066861	Hif3a	-4184	27.0554	26.0625	41.0931	0	0	1
chr7_19009177_19009677	chr7	19009177	19009677	Irf2bp1	5362	3.67228	37.1354	79.5364	0	1	1
chr7_19011974_19012661	chr7	19011974	19012661	Irf2bp1	8253	22.0955	92.8181	290.72	0	1	1
chr7_19700975_19701475	chr7	19700975	19701475	Apoe	-2037	21.0256	16.5084	32.8491	0	0	1
chr7_27315900_27316400	chr7	27315900	27316400	Ltbp4	17498	42.0546	11.7243	12.3247	1	0	0
chr7_27371695_27372195	chr7	27371695	27372195	Shkbp1	-15937	37.651	1.65351	3.34599	1	0	0
chr7_29123658_29124158	chr7	29123658	29124158	Ryr1	1243	37.1942	1.57603	0	1	0	0
chr7_29162686_29163186	chr7	29162686	29163186	Spred3	5711	10.3373	33.7886	31.6659	0	1	1
chr7_30336381_30336881	chr7	30336381	30336881	Sdhaf1	-14256	44.7452	39.2272	28.3199	1	1	0
chr7_31120927_31121427	chr7	31120927	31121427	Scn1b	5846	5.7485	32.814	77.5359	0	1	1
chr7_31130760_31131260	chr7	31130760	31131260	Scn1b	-3987	23.4284	28.1584	42.5625	0	0	1
chr7_44428721_44429221	chr7	44428721	44429221	Lrrc4b	-13516	37.0632	41.2038	26.9744	1	1	0
chr7_73941604_73942104	chr7	73941604	73942104	St8sia2	71828	24.7472	33.4052	30.1965	0	1	1
chr7_73944098_73944598	chr7	73944098	73944598	St8sia2	69334	1.16011	23.9095	105.077	0	0	1
chr7_74006756_74007341	chr7	74006756	74007341	St8sia2	6633	68.651	11.8375	9.61156	1	0	0
chr7_74043523_74044023	chr7	74043523	74044023	St8sia2	-30091	18.5439	34.5481	23.0973	0	1	0
chr7_74065450_74065950	chr7	74065450	74065950	St8sia2	-52018	43.2135	39.6603	13.8738	1	1	0
chr7_74107087_74107587	chr7	74107087	74107587	St8sia2	-93655	41.0245	24.6066	6.52968	1	0	0
chr7_74330324_74331103	chr7	74330324	74331103	Slco3a1	224066	47.1616	15.9927	1.1832	1	0	0
chr7_74346310_74346810	chr7	74346310	74346810	Slco3a1	208220	2.08718	15.0282	33.1353	0	0	1
chr7_74353213_74353713	chr7	74353213	74353713	Slco3a1	201317	45.8875	5.22351	0	1	0	0
chr7_74354421_74354921	chr7	74354421	74354921	Slco3a1	200109	47.6335	25.3631	14.6498	1	0	0
chr7_74391393_74391893	chr7	74391393	74391893	Slco3a1	163137	33.1401	7.93413	3.24419	1	0	0
chr7_74554009_74554509	chr7	74554009	74554509	Slco3a1	521	22.878	29.2094	40.4823	0	0	1
chr7_78766222_78766722	chr7	78766222	78766722	Mrpl46	16617	38.1875	29.8669	40.8895	1	0	1
chr7_79080151_79080651	chr7	79080151	79080651	Acan	26918	3.35565	47.8312	117.055	0	1	1
chr7_79080630_79081130	chr7	79080630	79081130	Acan	27397	21.4056	39.1039	74.3302	0	1	1
chr7_79140811_79141311	chr7	79140811	79141311	Mfge8	7999	22.0804	20.7044	30.0755	0	0	1
chr7_79170956_79171501	chr7	79170956	79171501	Mfge8	-22169	2.89448	48.135	164.006	0	1	1
chr7_79171848_79172348	chr7	79171848	79172348	Mfge8	-23038	0.329152	34.4258	87.9398	0	1	1
chr7_79362165_79362665	chr7	79362165	79362665	Rlbp1	24612	1.69343	23.2509	86.1045	0	0	1
chr7_79371426_79371926	chr7	79371426	79371926	Rlbp1	15351	17.263	32.4929	45.7077	0	1	1
chr7_81072398_81072898	chr7	81072398	81072898	Alpk3	15048	30.4682	6.64455	0	1	0	0
chr7_99539377_99539877	chr7	99539377	99539877	Arrb1	4141	5.08598	46.5437	61.5407	0	1	1
chr7_99927372_99927872	chr7	99927372	99927872	Rnf169	52836	9.41727	8.6161	32.9317	0	0	1
chr7_100073900_100074400	chr7	100073900	100074400	Pold3	47350	32.3407	5.88816	25.0565	1	0	0
chr7_100131679_100132179	chr7	100131679	100132179	Pold3	-10429	1.9549	37.0547	20.7501	0	1	0
chr7_100132364_100132965	chr7	100132364	100132965	Pold3	-11165	2.04376	81.908	170.762	0	1	1
chr7_101833879_101834379	chr7	101833879	101834379	Inppl1	3695	9.01838	30.9037	81.9633	0	1	1
chr7_105777719_105778219	chr7	105777719	105778219	Dchs1	9581	48.9408	37.5503	25.8709	1	1	0
chr7_109218086_109218586	chr7	109218086	109218586	Lmo1	-43129	11.765	12.7651	30.0755	0	0	1
chr7_109255459_109255959	chr7	109255459	109255959	Lmo1	-80502	10.9687	12.4736	31.0935	0	0	1
chr7_109276612_109277112	chr7	109276612	109277112	Lmo1	-101655	9.12239	22.1967	43.4595	0	0	1
chr7_109834889_109835389	chr7	109834889	109835389	Scube2	30540	20.9789	85.6342	54.6835	0	1	1
chr7_109836711_109837211	chr7	109836711	109837211	Scube2	28718	5.62323	34.437	18.813	0	1	0
chr7_109852883_109853383	chr7	109852883	109853383	Scube2	12546	30.7257	9.81499	6.28478	1	0	0
chr7_109868464_109868964	chr7	109868464	109868964	Scube2	-3035	17.4541	46.7424	119.03	0	1	1
chr7_112131984_112132484	chr7	112131984	112132484	Dkk3	26823	2.07173	66.1715	60.927	0	1	1
chr7_112136060_112136560	chr7	112136060	112136560	Dkk3	22747	3.13054	26.2093	61.9095	0	0	1
chr7_112144757_112145257	chr7	112144757	112145257	Dkk3	14050	14.8333	54.4859	38.3195	0	1	1
chr7_112147926_112148426	chr7	112147926	112148426	Dkk3	10881	10.8382	88.9769	65.4591	0	1	1
chr7_112154454_112154954	chr7	112154454	112154954	Dkk3	4353	17.0121	42.2161	14.8975	0	1	0
chr7_112164727_112165227	chr7	112164727	112165227	Dkk3	-5920	7.90941	33.2351	9.91696	0	1	0
chr7_112170248_112170748	chr7	112170248	112170748	Dkk3	-11441	2.80185	15.752	66.9832	0	0	1
chr7_112188009_112188509	chr7	112188009	112188509	Dkk3	-29202	1.89077	20.5821	66.0862	0	0	1
chr7_112615233_112615733	chr7	112615233	112615733	Tead1	-63837	30.9959	14.6409	5.99858	1	0	0
chr7_112620649_112621193	chr7	112620649	112621193	Tead1	-58399	31.6767	23.5027	22.4039	1	0	0
chr7_112627358_112627858	chr7	112627358	112627858	Tead1	-51712	48.2768	42.2601	7.46797	1	1	0
chr7_112656056_112656556	chr7	112656056	112656556	Tead1	-23014	33.2874	5.31121	0.979596	1	0	0
chr7_112662918_112663666	chr7	112662918	112663666	Tead1	-16028	144.565	52.1942	25.9151	1	1	0
chr7_112686489_112686989	chr7	112686489	112686989	Tead1	7419	32.1079	11.4032	4.02018	1	0	0
chr7_112696480_112696980	chr7	112696480	112696980	Tead1	17410	9.80144	13.121	31.542	0	0	1
chr7_112697044_112697544	chr7	112697044	112697544	Tead1	17974	39.7078	25.6679	11.5074	1	0	0
chr7_112720608_112721108	chr7	112720608	112721108	Tead1	-38526	38.6879	22.0011	6.48838	1	0	0
chr7_112760713_112761213	chr7	112760713	112761213	Tead1	1579	56.7007	13.2952	11.7139	1	0	0
chr7_112775846_112776346	chr7	112775846	112776346	Tead1	16712	34.8774	3.54758	7.67158	1	0	0
chr7_112793692_112794192	chr7	112793692	112794192	Tead1	34558	5.84182	10.2034	45.3169	0	0	1
chr7_112823598_112824098	chr7	112823598	112824098	Tead1	64464	51.591	23.2203	13.4666	1	0	0
chr7_115381961_115382461	chr7	115381961	115382461	Sox6	419398	5.21166	28.2092	45.0912	0	0	1
chr7_115382356_115382856	chr7	115382356	115382856	Sox6	419003	2.47572	25.4752	34.1562	0	0	1
chr7_115410613_115411162	chr7	115410613	115411162	Sox6	390721	43.8606	62.895	5.75368	1	1	0
chr7_115411425_115411925	chr7	115411425	115411925	Sox6	389934	16.1303	73.7976	90.2515	0	1	1
chr7_115415184_115415684	chr7	115415184	115415684	Sox6	386175	3.44373	13.5684	30.1965	0	0	1
chr7_115450437_115450937	chr7	115450437	115450937	Sox6	350922	6.01575	32.3257	67.0879	0	1	1
chr7_115461759_115462259	chr7	115461759	115462259	Sox6	339600	2.84481	34.1026	26.936	0	1	0
chr7_115474007_115474507	chr7	115474007	115474507	Sox6	327352	4.88806	56.7419	138.056	0	1	1
chr7_115481623_115482123	chr7	115481623	115482123	Sox6	319736	2.08718	30.396	28.851	0	1	0
chr7_115509644_115510144	chr7	115509644	115510144	Sox6	291715	9.39325	14.4197	47.0888	0	0	1
chr7_115510010_115510510	chr7	115510010	115510510	Sox6	291349	29.4536	25.0277	57.072	0	0	1
chr7_115548328_115548828	chr7	115548328	115548828	Sox6	253031	5.597	31.2799	10.4068	0	1	0
chr7_115558998_115559625	chr7	115558998	115559625	Sox6	242297	2.43782	63.8747	90.0613	0	1	1
chr7_115597357_115597857	chr7	115597357	115597857	Sox6	204002	10.7271	40.0428	44.1529	0	1	1
chr7_115624712_115625563	chr7	115624712	115625563	Sox6	176471	17.4152	90.3663	197.645	0	1	1
chr7_115637606_115638126	chr7	115637606	115638126	Sox6	163743	1.63352	32.7946	26.79	0	1	0
chr7_115647700_115648248	chr7	115647700	115648248	Sox6	153635	3.92526	37.4044	26.4049	0	1	0
chr7_115667019_115667519	chr7	115667019	115667519	Sox6	134340	13.1767	22.622	35.6064	0	0	1
chr7_115685969_115686469	chr7	115685969	115686469	Sox6	115390	2.0877	16.3474	56.8213	0	0	1
chr7_115686565_115687065	chr7	115686565	115687065	Sox6	114794	4.21151	31.2351	10.3242	0	1	0
chr7_115693284_115693784	chr7	115693284	115693784	Sox6	108075	3.73919	12.7774	32.2767	0	0	1
chr7_115747423_115747923	chr7	115747423	115747923	Sox6	53936	31.2411	2.05718	6.69198	1	0	0
chr7_115829666_115830166	chr7	115829666	115830166	Sox6	-5206	31.0995	4.09805	3.34599	1	0	0
chr7_126265869_126266369	chr7	126265869	126266369	Sbk1	-6500	51.7562	30.1359	8.44757	1	1	0
chr7_126986284_126986784	chr7	126986284	126986784	Cdipt	10620	9.70099	19.738	42.2379	0	0	1
chr7_130669182_130669682	chr7	130669182	130669682	Tacc2	-23124	40.1737	10.3043	2.16279	1	0	0
chr7_130949309_130949809	chr7	130949309	130949809	Htra1	13356	10.3243	41.0804	36.1183	0	1	1
chr7_130961453_130961953	chr7	130961453	130961953	Htra1	25500	34.7035	28.297	3.18369	1	0	0
chr7_130965801_130966301	chr7	130965801	130966301	Htra1	29848	62.1216	12.9731	2.40769	1	0	0
chr7_130966387_130966887	chr7	130966387	130966887	Htra1	30434	45.8108	11.8242	4.81538	1	0	0
chr7_130968385_130968885	chr7	130968385	130968885	Htra1	32432	17.827	27.3776	40.3584	0	0	1
chr7_130976262_130976762	chr7	130976262	130976762	Htra1	40309	10.9059	25.6159	57.3332	0	0	1
chr7_130982333_130982833	chr7	130982333	130982833	Htra1	46380	12.8919	39.8724	80.1223	0	1	1
chr7_132088364_132088865	chr7	132088364	132088865	Cpxm2	66126	2.7797	40.3485	33.4215	0	1	1
chr7_132212063_132212706	chr7	132212063	132212706	Cpxm2	-57644	9.30714	26.096	94.4282	0	0	1
chr7_133003385_133003885	chr7	133003385	133003885	Ctbp2	11612	44.484	19.7777	19.2202	1	0	0
chr7_133032536_133033036	chr7	133032536	133033036	Ctbp2	-17539	37.3935	27.0879	52.4352	1	0	1
chr7_133762786_133763286	chr7	133762786	133763286	Dhx32	-2767	1.58438	14.6879	37.1142	0	0	1
chr7_133805596_133806096	chr7	133805596	133806096	Dhx32	-23061	31.2571	20.8818	25.3427	1	0	0
chr7_133884833_133885333	chr7	133884833	133885333	Dhx32	-102298	69.4702	20.7105	2.65259	1	0	0
chr7_133957794_133958294	chr7	133957794	133958294	Dhx32	-175259	42.3161	3.78818	1.22449	1	0	0
chr7_133963951_133964451	chr7	133963951	133964451	Dhx32	-181416	6.25614	30.97	4.61178	0	1	0
chr7_133976448_133976948	chr7	133976448	133976948	Dhx32	-193913	30.261	11.4705	1.1832	1	0	0
chr7_134026116_134026616	chr7	134026116	134026616	Adam12	198731	48.0029	26.3968	48.319	1	0	1
chr7_134114326_134114944	chr7	134114326	134114944	Adam12	110462	36.3091	5.54868	0.489798	1	0	0
chr7_134139477_134140097	chr7	134139477	134140097	Adam12	85310	35.8027	14.3534	15.8742	1	0	0
chr7_134207857_134208357	chr7	134207857	134208357	Adam12	16990	31.3692	3.06641	2.65259	1	0	0
chr7_134223711_134224211	chr7	134223711	134224211	Adam12	1136	45.0315	25.1532	32.2383	1	0	1
chr7_134227828_134228328	chr7	134227828	134228328	Adam12	-2981	4.12487	30.9975	82.6538	0	1	1
chr7_134263469_134263969	chr7	134263469	134263969	Adam12	-38622	12.8246	30.4928	44.3181	0	1	1
chr7_134287735_134288235	chr7	134287735	134288235	Adam12	-62888	30.2804	14.5746	0.489798	1	0	0
chr7_134289754_134290254	chr7	134289754	134290254	Adam12	-64907	53.5547	23.41	36.6081	1	0	1
chr7_138727287_138727787	chr7	138727287	138727787	Mapk1ip1	118730	4.41683	35.6318	30.1965	0	1	1
chr7_139516142_139516698	chr7	139516142	139516698	Nkx6-2	66377	14.4671	52.9739	76.7849	0	1	1
chr7_139576751_139577251	chr7	139576751	139577251	Nkx6-2	5796	1.09651	11.1494	42.623	0	0	1
chr7_139616096_139616596	chr7	139616096	139616596	Nkx6-2	-33549	22.1591	28.82	36.7291	0	0	1
chr7_139624883_139625444	chr7	139624883	139625444	Nkx6-2	-42367	16.5726	34.6377	18.0783	0	1	0
chr7_141477869_141478369	chr7	141477869	141478369	Tspan4	1739	13.5948	81.2885	130.098	0	1	1
chr7_141481850_141482350	chr7	141481850	141482350	Tspan4	5720	47.6153	43.8308	26.7295	1	1	0
chr7_144621212_144621712	chr7	144621212	144621712	Fadd	-39026	14.5985	60.1845	61.2545	0	1	1
chr7_144653721_144654221	chr7	144653721	144654221	Fadd	-71535	13.137	29.2582	52.7848	0	0	1
chr7_145253003_145253503	chr7	145253003	145253503	Tpcn2	30758	19.2108	25.7831	45.8287	0	0	1
chr8_11165540_11166040	chr8	11165540	11166040	Col4a2	-147015	20.4146	86.1428	192.857	0	1	1
chr8_11169577_11170077	chr8	11169577	11170077	Col4a2	-142978	3.47363	24.5741	41.1757	0	0	1
chr8_11173772_11174272	chr8	11173772	11174272	Col4a2	-138783	20.2292	33.3564	52.6417	0	1	1
chr8_11187857_11188357	chr8	11187857	11188357	Col4a2	-124698	35.4722	27.5192	18.037	1	0	0
chr8_11190626_11191126	chr8	11190626	11191126	Col4a2	-121929	0.743874	18.217	49.579	0	0	1
chr8_11252234_11252734	chr8	11252234	11252734	Col4a2	-60321	50.4661	3.7107	0	1	0	0
chr8_11253480_11253980	chr8	11253480	11253980	Col4a2	-59075	34.8085	28.7894	38.6057	1	0	1
chr8_11260280_11260780	chr8	11260280	11260780	Col4a2	-52275	6.0931	55.2311	86.4291	0	1	1
chr8_11262219_11262719	chr8	11262219	11262719	Col4a2	-50336	31.1455	12.2432	0.489798	1	0	0
chr8_11265339_11265839	chr8	11265339	11265839	Col4a2	-47216	32.3665	4.92179	0.979596	1	0	0
chr8_11276263_11276763	chr8	11276263	11276763	Col4a2	-36292	5.83782	27.8811	40.1932	0	0	1
chr8_11292597_11293097	chr8	11292597	11293097	Col4a2	-19958	72.3142	5.94422	1.673	1	0	0
chr8_11327292_11327792	chr8	11327292	11327792	Col4a1	-14716	22.4595	40.3293	28.9336	0	1	0
chr8_11348608_11349108	chr8	11348608	11349108	Col4a1	-36032	30.7852	1.54544	4.32559	1	0	0
chr8_11382349_11382849	chr8	11382349	11382849	Col4a1	-69773	35.4423	12.4644	4.61178	1	0	0
chr8_15145412_15145912	chr8	15145412	15145912	Myom2	88009	1.64949	21.3976	77.9623	0	0	1
chr8_15192435_15192935	chr8	15192435	15192935	Myom2	135032	2.83257	38.0834	78.0228	0	1	1
chr8_15223780_15224280	chr8	15223780	15224280	Myom2	166377	3.49726	45.2869	76.1242	0	1	1
chr8_25027678_25028178	chr8	25027678	25028178	Tm2d2	10717	32.8337	26.3111	21.9967	1	0	0
chr8_25194497_25194997	chr8	25194497	25194997	Tacc1	6795	2.6793	20.0193	33.7461	0	0	1
chr8_40961665_40962165	chr8	40961665	40962165	Pdgfrl	35682	32.0715	38.8948	21.1794	1	1	0
chr8_40970211_40970711	chr8	40970211	40970711	Pdgfrl	44228	13.5015	13.3339	33.1353	0	0	1
chr8_57429127_57429627	chr8	57429127	57429627	Scrg1	-26546	29.9099	34.1342	13.7941	0	1	0
chr8_57456369_57456869	chr8	57456369	57456869	Scrg1	696	1.63964	40.6289	34.2167	0	1	1
chr8_57457079_57457579	chr8	57457079	57457579	Scrg1	1406	2.19623	66.7901	43.8283	0	1	1
chr8_57457780_57458336	chr8	57457780	57458336	Scrg1	2135	9.22983	74.1727	92.1281	0	1	1
chr8_57468522_57469022	chr8	57468522	57469022	Scrg1	12849	20.2831	30.4827	15.9568	0	1	0
chr8_69936485_69936985	chr8	69936485	69936985	Ndufa13	-34177	48.1018	9.88629	1.46939	1	0	0
chr8_70366543_70367043	chr8	70366543	70367043	Comp	-6755	1.87532	56.3004	175.313	0	1	1
chr8_70383228_70383728	chr8	70383228	70383728	Comp	9930	17.3511	20.3048	53.7039	0	0	1
chr8_71507559_71508059	chr8	71507559	71508059	Plvap	3960	63.4853	45.1113	25.2188	1	1	0
chr8_72287942_72288442	chr8	72287942	72288442	Klf2	-30870	0.984947	24.6598	91.8169	0	0	1
chr8_72288967_72289467	chr8	72288967	72289467	Klf2	-29845	3.79503	53.9334	112.586	0	1	1
chr8_72302815_72303315	chr8	72302815	72303315	Klf2	-15997	9.61266	86.6741	114.752	0	1	1
chr8_72303598_72304098	chr8	72303598	72304098	Klf2	-15214	28.124	51.7518	85.7194	0	1	1
chr8_72365762_72366262	chr8	72365762	72366262	Klf2	46950	16.3389	20.0132	41.5829	0	0	1
chr8_80811418_80811918	chr8	80811418	80811918	Gab1	68811	7.91355	23.8463	88.2865	0	0	1
chr8_80814075_80814575	chr8	80814075	80814575	Gab1	66154	66.7376	25.8708	9.42717	1	0	0
chr8_80851676_80852176	chr8	80851676	80852176	Gab1	28553	2.31925	31.2034	41.1728	0	1	1
chr8_80857704_80858204	chr8	80857704	80858204	Gab1	22525	24.4033	35.5044	13.5492	0	1	0
chr8_80869865_80870427	chr8	80869865	80870427	Gab1	10333	9.48661	87.7165	136.911	0	1	1
chr8_80895269_80895769	chr8	80895269	80895769	Gab1	-15000	33.5065	43.003	9.34457	1	1	0
chr8_80908113_80908613	chr8	80908113	80908613	Gab1	-27844	37.8732	10.1769	0	1	0	0
chr8_80912962_80913462	chr8	80912962	80913462	Gab1	-32693	20.357	25.4895	41.1123	0	0	1
chr8_80937946_80938921	chr8	80937946	80938921	Gab1	-57915	120.238	45.6109	6.18298	1	1	0
chr8_84127251_84127751	chr8	84127251	84127751	Podnl1	1512	10.3484	55.9253	66.4329	0	1	1
chr8_94191073_94191573	chr8	94191073	94191573	Mt1	12234	31.2159	17.1293	11.3864	1	0	0
chr8_102026976_102027476	chr8	102026976	102027476	Cdh11	757885	39.0869	10.7916	2.65259	1	0	0
chr8_102096709_102097209	chr8	102096709	102097209	Cdh11	688152	8.21825	42.9737	2.93879	0	1	0
chr8_102098896_102099508	chr8	102098896	102099508	Cdh11	685909	10.2562	73.6205	13.1804	0	1	0
chr8_102116828_102117328	chr8	102116828	102117328	Cdh11	668033	10.7262	38.4086	5.59138	0	1	0
chr8_102500178_102500678	chr8	102500178	102500678	Cdh11	284683	21.7909	38.7562	6.97818	0	1	0
chr8_102742879_102743379	chr8	102742879	102743379	Cdh11	41982	32.3657	15.8744	2.93879	1	0	0
chr8_102852542_102853143	chr8	102852542	102853143	Cdh11	-67732	11.3682	90.239	40.7685	0	1	1
chr8_102900628_102901128	chr8	102900628	102901128	Cdh11	-115767	14.5608	60.5006	34.3185	0	1	1
chr8_102983780_102984280	chr8	102983780	102984280	Cdh11	-198919	7.83257	32.0403	106.021	0	1	1
chr8_103055978_103056478	chr8	103055978	103056478	Cdh11	-271117	15.644	30.8354	0.489798	0	1	0
chr8_105206740_105207240	chr8	105206740	105207240	D230025D16Rik	-18198	7.78173	43.5943	14.3636	0	1	0
chr8_107455188_107455688	chr8	107455188	107455688	Wwp2	19040	15.1229	35.5868	27.7091	0	1	0
chr8_107458116_107458671	chr8	107458116	107458671	Wwp2	21996	1.51195	83.0418	126.854	0	1	1
chr8_107465142_107465800	chr8	107465142	107465800	Wwp2	29073	3.07213	131.548	285.186	0	1	1
chr8_107468824_107469377	chr8	107468824	107469377	Wwp2	32703	12.4424	170.622	323.891	0	1	1
chr8_107470237_107470737	chr8	107470237	107470737	Wwp2	34089	13.6117	87.8053	58.6019	0	1	1
chr8_107472512_107473164	chr8	107472512	107473164	Wwp2	36440	19.5365	211.607	430.528	0	1	1
chr8_107478898_107479563	chr8	107478898	107479563	Wwp2	42833	8.53489	81.4778	99.7334	0	1	1
chr8_107489848_107490348	chr8	107489848	107490348	Wwp2	53700	3.65211	27.7332	46.4395	0	0	1
chr8_107491110_107491754	chr8	107491110	107491754	Wwp2	55034	8.73899	113.328	128.912	0	1	1
chr8_108671872_108672372	chr8	108671872	108672372	Zfhx3	-42522	28.4858	32.6896	32.1999	0	1	1
chr8_108673805_108674305	chr8	108673805	108674305	Zfhx3	-40589	5.4883	39.6839	23.9559	0	1	0
chr8_108691887_108692387	chr8	108691887	108692387	Zfhx3	-22507	32.622	20.6696	20.5657	1	0	0
chr8_108692164_108692664	chr8	108692164	108692664	Zfhx3	-22230	39.0117	28.1644	30.6037	1	0	1
chr8_108703672_108704172	chr8	108703672	108704172	Zfhx3	-10722	40.0218	45.7454	23.9943	1	1	0
chr8_108704677_108705177	chr8	108704677	108705177	Zfhx3	-9717	34.994	36.4543	26.0361	1	1	0
chr8_108716526_108717026	chr8	108716526	108717026	Zfhx3	2132	33.7929	40.1039	19.5064	1	1	0
chr8_108755467_108755967	chr8	108755467	108755967	Zfhx3	41073	8.83187	47.7812	105.14	0	1	1
chr8_108759433_108759933	chr8	108759433	108759933	Zfhx3	45039	24.3919	18.5534	38.1956	0	0	1
chr8_108759681_108760181	chr8	108759681	108760181	Zfhx3	45287	24.8835	18.1874	34.0131	0	0	1
chr8_108778007_108778507	chr8	108778007	108778507	Zfhx3	63613	3.81923	18.2598	41.9901	0	0	1
chr8_108798014_108798514	chr8	108798014	108798514	Zfhx3	83620	88.7897	27.776	9.22357	1	0	0
chr8_108811690_108812190	chr8	108811690	108812190	Zfhx3	97296	43.8541	13.3075	5.10158	1	0	0
chr8_108822879_108823379	chr8	108822879	108823379	Zfhx3	108485	23.7153	30.0769	31.4623	0	1	1
chr8_110921309_110921809	chr8	110921309	110921809	St3gal2	1694	65.3324	22.6229	7.38538	1	0	0
chr8_111902025_111902525	chr8	111902025	111902525	Chst5	7924	47.4508	3.7107	0	1	0	0
chr8_111904216_111904716	chr8	111904216	111904716	Chst5	5733	43.4136	34.4523	10.2032	1	1	0
chr8_111905540_111906040	chr8	111905540	111906040	Chst5	4409	79.2629	35.5195	8.24397	1	1	0
chr8_111912864_111913443	chr8	111912864	111913443	Chst5	-2955	20.8488	40.6676	184.264	0	1	1
chr8_123884713_123885213	chr8	123884713	123885213	Acta1	9812	78.0355	31.7243	25.3427	1	1	0
chr8_124643864_124644364	chr8	124643864	124644364	2310022B05Rik	19255	58.1105	53.8447	29.0162	1	1	0
chr8_124652507_124653007	chr8	124652507	124653007	2310022B05Rik	10612	37.7047	27.0329	19.4843	1	0	0
chr8_127055006_127055506	chr8	127055006	127055506	Pard3	-8800	32.182	0.519905	0	1	0	0
chr8_127092696_127093196	chr8	127092696	127093196	Pard3	28890	68.1059	12.4145	1.46939	1	0	0
chr8_127107829_127108329	chr8	127107829	127108329	Pard3	44023	32.6615	11.8334	4.71358	1	0	0
chr8_127134022_127134522	chr8	127134022	127134522	Pard3	70216	9.21189	34.2412	1.81609	0	1	0
chr8_127139096_127139596	chr8	127139096	127139596	Pard3	75290	27.5212	30.0361	28.4851	0	1	0
chr8_127183972_127184472	chr8	127183972	127184472	Pard3	-115390	12.3579	26.5977	40.9471	0	0	1
chr8_127214674_127215174	chr8	127214674	127215174	Pard3	-84688	17.342	32.337	3.63219	0	1	0
chr8_127219534_127220034	chr8	127219534	127220034	Pard3	-79828	46.6686	12.021	6.48838	1	0	0
chr8_127254478_127254978	chr8	127254478	127254978	Pard3	-44884	4.64981	27.8628	81.0029	0	0	1
chr8_127438566_127439066	chr8	127438566	127439066	Pard3	139164	33.4421	25.723	14.5287	1	0	0
chr8_127439238_127439796	chr8	127439238	127439796	Pard3	139865	52.2422	12.9089	9.46846	1	0	0
chr8_127543635_127544135	chr8	127543635	127544135	Pard3	244233	9.11312	49.1361	7.50927	0	1	0
chr8_127553623_127554123	chr8	127553623	127554123	Pard3	254221	21.3642	39.5983	6.28478	0	1	0
chr8_127720756_127721265	chr8	127720756	127721265	Pard3	421359	27.6217	40.9132	9.63077	0	1	0
chr9_13448780_13449364	chr9	13448780	13449364	Phxr4	17711	3.41576	37.0447	132.665	0	1	1
chr9_13454659_13455159	chr9	13454659	13455159	Phxr4	23548	58.124	39.0784	27.3019	1	1	0
chr9_20972515_20973015	chr9	20972515	20973015	S1pr2	4028	23.7125	39.9306	129.195	0	1	1
chr9_20975313_20975813	chr9	20975313	20975813	S1pr2	1230	61.5304	29.8302	24.0356	1	0	0
chr9_20986933_20987433	chr9	20986933	20987433	S1pr2	-10390	82.5382	32.9394	9.95826	1	1	0
chr9_20987264_20987764	chr9	20987264	20987764	S1pr2	-10721	44.7768	20.9551	4.99978	1	0	0
chr9_21354359_21355151	chr9	21354359	21355151	Ilf3	-13116	9.36032	74.9538	172.082	0	1	1
chr9_21357228_21357728	chr9	21357228	21357728	Ilf3	-10393	34.207	30.7089	29.2198	1	1	0
chr9_21782034_21782534	chr9	21782034	21782534	Kank2	16262	56.9844	51.0116	20.0375	1	1	0
chr9_21786863_21787363	chr9	21786863	21787363	Kank2	11433	22.9803	21.2385	51.7226	0	0	1
chr9_22143274_22143774	chr9	22143274	22143774	Acp5	-7778	18.8542	23.1673	38.1159	0	0	1
chr9_40617451_40617951	chr9	40617451	40617951	Clmp	-68263	16.1947	48.6037	12.2834	0	1	0
chr9_40675546_40676046	chr9	40675546	40676046	Clmp	-10168	43.9964	23.5251	11.3864	1	0	0
chr9_40717676_40718176	chr9	40717676	40718176	Clmp	31962	53.2259	14.9875	5.50878	1	0	0
chr9_40731295_40731795	chr9	40731295	40731795	Clmp	45581	49.5471	60.4892	26.0966	1	1	0
chr9_40731575_40732075	chr9	40731575	40732075	Clmp	45861	46.3878	47.9136	24.1182	1	1	0
chr9_40732253_40732753	chr9	40732253	40732753	Clmp	46539	37.5065	34.1016	19.1405	1	1	0
chr9_41084147_41084647	chr9	41084147	41084647	Ubash3b	73097	70.4214	30.1095	12.5696	1	1	0
chr9_41098996_41099496	chr9	41098996	41099496	Ubash3b	58248	13.7686	55.3301	21.2207	0	1	0
chr9_41108343_41108843	chr9	41108343	41108843	Ubash3b	48901	38.1442	11.8782	6.48838	1	0	0
chr9_43920058_43920558	chr9	43920058	43920558	Thy1	-123076	20.3866	42.9958	77.0653	0	1	1
chr9_43947734_43948309	chr9	43947734	43948309	Thy1	-95362	48.8415	3.82587	0.979596	1	0	0
chr9_43959485_43959985	chr9	43959485	43959985	Thy1	-83649	40.1165	33.8773	25.3427	1	1	0
chr9_43984597_43985097	chr9	43984597	43985097	Thy1	-58537	53.9704	50.9261	24.4841	1	1	0
chr9_43988965_43989673	chr9	43988965	43989673	Thy1	-54065	33.3336	79.9612	14.0389	1	1	0
chr9_45358287_45358787	chr9	45358287	45358787	Fxyd6	-11648	56.2401	31.0555	9.38587	1	1	0
chr9_45361998_45362498	chr9	45361998	45362498	Fxyd6	-7937	21.9833	38.8378	32.9317	0	1	1
chr9_45370628_45371128	chr9	45370628	45371128	Fxyd6	693	36.6132	25.8729	7.46797	1	0	0
chr9_56160259_56160759	chr9	56160259	56160759	Tspan3	561	53.1029	37.4799	27.8935	1	1	0
chr9_56166067_56166567	chr9	56166067	56166567	Tspan3	-5247	13.7206	19.2486	37.5819	0	0	1
chr9_56242612_56243112	chr9	56242612	56243112	Tspan3	-81792	4.27131	12.4043	34.646	0	0	1
chr9_56552777_56553277	chr9	56552777	56553277	Lingo1	82621	22.2329	23.1225	45.5012	0	0	1
chr9_56589726_56590226	chr9	56589726	56590226	Lingo1	45672	1.03712	17.9785	105.404	0	0	1
chr9_56656678_56657178	chr9	56656678	56657178	Lingo1	-21280	7.41796	15.5053	35.3423	0	0	1
chr9_56767554_56768054	chr9	56767554	56768054	Lingo1	-82551	5.94938	14.233	34.7257	0	0	1
chr9_56860860_56861360	chr9	56860860	56861360	Cspg4	-3994	3.23608	42.1551	75.208	0	1	1
chr9_56874143_56874643	chr9	56874143	56874643	Cspg4	9289	3.5533	31.443	97.1605	0	1	1
chr9_56877240_56877740	chr9	56877240	56877740	Cspg4	12386	3.45043	43.1378	94.4061	0	1	1
chr9_56878981_56879481	chr9	56878981	56879481	Cspg4	14127	3.02149	24.6404	105.204	0	0	1
chr9_56880752_56881309	chr9	56880752	56881309	Cspg4	15927	8.78899	121.031	438.53	0	1	1
chr9_56881501_56882229	chr9	56881501	56882229	Cspg4	16761	16.9642	194.236	526.076	0	1	1
chr9_56882761_56883261	chr9	56882761	56883261	Cspg4	17907	27.8309	39.3027	30.6066	0	1	1
chr9_56891403_56891903	chr9	56891403	56891903	Cspg4	26549	64.2823	40.9052	28.0366	1	1	0
chr9_60079418_60079918	chr9	60079418	60079918	Thsd4	61552	0.546741	13.6134	47.7217	0	0	1
chr9_60115644_60116279	chr9	60115644	60116279	Thsd4	25258	8.47541	76.2299	62.1515	0	1	1
chr9_60119832_60120332	chr9	60119832	60120332	Thsd4	21138	31.9	14.9732	6.32608	1	0	0
chr9_60139420_60139920	chr9	60139420	60139920	Thsd4	1550	22.7657	54.7927	40.8895	0	1	1
chr9_60172585_60173085	chr9	60172585	60173085	Thsd4	-31615	8.28934	55.0016	41.0739	0	1	1
chr9_60179895_60180395	chr9	60179895	60180395	Thsd4	-38925	1.3141	8.85671	33.5041	0	0	1
chr9_60198536_60199129	chr9	60198536	60199129	Thsd4	-57613	16.0939	51.3542	64.1962	0	1	1
chr9_60226081_60226581	chr9	60226081	60226581	Thsd4	-85111	38.0923	12.6112	3.14239	1	0	0
chr9_60237563_60238063	chr9	60237563	60238063	Thsd4	-96593	19.8068	44.0531	29.6683	0	1	0
chr9_60244908_60245408	chr9	60244908	60245408	Thsd4	-103938	31.365	30.8415	26.9523	1	1	0
chr9_60281212_60281712	chr9	60281212	60281712	Thsd4	-140242	44.7307	9.08504	12.2008	1	0	0
chr9_60288737_60289237	chr9	60288737	60289237	Thsd4	-147767	36.5275	14.6001	3.38729	1	0	0
chr9_60309670_60310170	chr9	60309670	60310170	Thsd4	-168700	31.7282	7.21952	2.65259	1	0	0
chr9_60364052_60364723	chr9	60364052	60364723	Thsd4	146647	13.1544	59.4076	170.11	0	1	1
chr9_60405740_60406240	chr9	60405740	60406240	Thsd4	105045	7.41616	34.6247	73.0231	0	1	1
chr9_60407338_60407838	chr9	60407338	60407838	Thsd4	103447	22.4798	49.2419	111.441	0	1	1
chr9_60440290_60440835	chr9	60440290	60440835	Thsd4	70472	34.8192	10.5796	3.59089	1	0	0
chr9_60445859_60446359	chr9	60445859	60446359	Thsd4	64926	15.1319	33.6622	10.6104	0	1	0
chr9_60466859_60467359	chr9	60466859	60467359	Thsd4	43926	2.9688	38.2547	11.7936	0	1	0
chr9_60491423_60491923	chr9	60491423	60491923	Thsd4	19362	20.6395	32.543	7.55057	0	1	0
chr9_65664090_65664590	chr9	65664090	65664590	Oaz2	-12208	23.9512	35.5501	18.8543	0	1	0
chr9_65693251_65693751	chr9	65693251	65693751	Oaz2	16953	13.2991	25.6383	57.7404	0	0	1
chr9_67012383_67012883	chr9	67012383	67012883	Tpm1	31238	92.365	26.2439	3.42859	1	0	0
chr9_67036683_67037183	chr9	67036683	67037183	Tpm1	6938	19.9403	36.0975	22.5249	0	1	0
chr9_67047249_67047749	chr9	67047249	67047749	Tpm1	1714	21.2618	40.2976	38.2561	0	1	1
chr9_67058332_67058832	chr9	67058332	67058832	Tpm1	-9369	40.146	24.2539	11.3038	1	0	0
chr9_67077833_67078333	chr9	67077833	67078333	Tpm1	-28870	20.8666	41.5495	16.3227	0	1	0
chr9_67081592_67082092	chr9	67081592	67082092	Tpm1	-32629	76.9425	42.7035	14.2838	1	1	0
chr9_71450555_71451110	chr9	71450555	71451110	Polr2m	34125	39.97	16.9224	0.244899	1	0	0
chr9_71512777_71513377	chr9	71512777	71513377	Polr2m	-27094	21.8354	65.3439	15.3047	0	1	0
chr9_75654436_75654942	chr9	75654436	75654942	Lysmd2	28957	98.5627	42.5586	21.262	1	1	0
chr9_87634161_87634661	chr9	87634161	87634661	Tbx18	96849	41.1923	5.74342	0	1	0	0
chr9_87739294_87739794	chr9	87739294	87739794	Tbx18	-8284	40.3795	34.5899	12.6714	1	1	0
chr9_87740602_87741102	chr9	87740602	87741102	Tbx18	-9592	29.3544	33.0363	41.6655	0	1	1
chr9_87741595_87742095	chr9	87741595	87742095	Tbx18	-10585	44.4394	12.914	1.1832	1	0	0
chr9_87843879_87844379	chr9	87843879	87844379	Tbx18	-112869	51.1465	15.7887	7.18178	1	0	0
chr9_87864994_87865588	chr9	87864994	87865588	Tbx18	-134031	12.4149	55.387	40.0751	0	1	1
chr9_87940147_87940671	chr9	87940147	87940671	Tbx18	-209149	36.9111	5.77605	0	1	0	0
chr9_92512703_92513203	chr9	92512703	92513203	Plod2	-29270	1.43139	33.5551	37.0537	0	1	1
chr9_92537688_92538188	chr9	92537688	92538188	Plod2	-4285	38.9607	17.3241	1.46939	1	0	0
chr9_92538135_92538635	chr9	92538135	92538635	Plod2	-3838	35.8306	15.4544	5.79498	1	0	0
chr9_92547055_92547555	chr9	92547055	92547555	B430319G15Rik	-4436	1.9105	15.8662	36.8088	0	0	1
chr9_92577402_92578163	chr9	92577402	92578163	B430319G15Rik	-34914	15.4585	42.9767	38.7104	0	1	1
chr9_92600066_92600566	chr9	92600066	92600566	B430319G15Rik	-57447	3.00701	35.9519	118.079	0	1	1
chr9_98430509_98431009	chr9	98430509	98431009	Rbp1	7798	6.14007	10.1677	39.8273	0	0	1
chr9_107721006_107721506	chr9	107721006	107721506	Sema3f	-10781	3.12179	31.5103	33.87	0	1	1
chr9_107729702_107730202	chr9	107729702	107730202	Sema3f	-19477	45.4383	36.2801	9.01996	1	1	0
chr9_108450230_108450730	chr9	108450230	108450730	Ccdc71	-10038	36.9961	16.6756	7.46797	1	0	0
chr9_108460771_108461271	chr9	108460771	108461271	Ccdc71	503	28.5638	31.1902	29.748	0	1	0
chr9_110728715_110729215	chr9	110728715	110729215	Pth1r	13645	6.76403	51.026	126.743	0	1	1
chr9_110736367_110736867	chr9	110736367	110736867	Pth1r	5993	5.8354	27.2042	77.412	0	0	1
chr9_110749577_110750077	chr9	110749577	110750077	Pth1r	-2682	1.97813	3.10308	40.1135	0	0	1
chr9_110750340_110750840	chr9	110750340	110750840	Pth1r	-3445	7.39478	18.1384	56.0511	0	0	1
chr9_110750726_110751226	chr9	110750726	110751226	Pth1r	-3831	12.7093	77.2597	163.192	0	1	1
chr9_110754794_110755294	chr9	110754794	110755294	Pth1r	-7899	1.98437	4.66486	32.7665	0	0	1
chr9_114042451_114042957	chr9	114042451	114042957	Susd5	-14650	6.25852	67.5702	132.627	0	1	1
chr9_114085744_114086244	chr9	114085744	114086244	Susd5	28640	0.767358	32.1382	88.2644	0	1	1
chr9_114112234_114112990	chr9	114112234	114112990	Susd5	55258	12.43	181.559	231.829	0	1	1
chr9_114116598_114117098	chr9	114116598	114117098	Susd5	59494	24.9767	50.0095	64.8838	0	1	1
chr9_119042122_119042661	chr9	119042122	119042661	Vill	-10386	3.53151	91.4588	49.4993	0	1	1
chr9_121331415_121331915	chr9	121331415	121331915	Trak1	-35293	44.7581	4.54253	3.63219	1	0	0
chr9_121347914_121348414	chr9	121347914	121348414	Trak1	-18794	42.0383	23.0592	25.4666	1	0	0
chr9_121360385_121360885	chr9	121360385	121360885	Trak1	-6323	12.1841	17.6685	43.0302	0	0	1
chr9_121385070_121385570	chr9	121385070	121385570	Trak1	18362	43.827	40.6747	29.0959	1	1	0
chr9_121777970_121778470	chr9	121777970	121778470	Klhl40	613	42.2382	26.2683	15.1396	1	0	0
chr9_122188670_122189170	chr9	122188670	122189170	Snrk	71654	3.38154	6.14707	30.6863	0	0	1
chrX_7670241_7670741	chrX	7670241	7670741	Plp2	899	16.4817	25.9727	31.0551	0	0	1
chrX_53074566_53075066	chrX	53074566	53075066	C430049B03Rik	-17626	1.3141	24.6598	37.2573	0	0	1
chrX_53078296_53078796	chrX	53078296	53078796	C430049B03Rik	-21356	2.31352	12.6765	31.0772	0	0	1
chrX_73474450_73474950	chrX	73474450	73474950	Bgn	-8901	22.3411	33.5389	7.26437	0	1	0
chrX_99522776_99523276	chrX	99522776	99523276	Pja1	-52291	16.7183	18.4412	30.0563	0	0	1
chrX_99550152_99550832	chrX	99550152	99550832	Pja1	-79757	6.42528	49.2664	191.947	0	1	1
chrX_99612043_99612543	chrX	99612043	99612543	Pja1	-141558	3.74588	6.79137	36.7454	0	0	1
chrX_143847858_143848941	chrX	143847858	143848941	Capn6	-20988	15.8228	117.131	101.403	0	1	1

## Sheet: Attachment specific
peak definition						average ATACseq signal			ascessable in
Peak	chr	start	end	associated Gene	Distance to TSS	tenocyte	attachment	chondrocytes	tenocyte	attachment	chondrocytes
chr1_12800586_12801143	chr1	12800586	12801143	Sulf1	82320	12.9535	45.1164	20.7722	0	1	0
chr1_132431775_132432275	chr1	132431775	132432275	Dstyk	14572	12.6404	34.3574	9.99956	0	1	0
chr1_135565089_135565589	chr1	135565089	135565589	Nav1	20016	21.2875	32.9149	19.9357	0	1	0
chr1_170646294_170646794	chr1	170646294	170646794	Olfml2b	2012	20.1444	50.1452	29.0575	0	1	0
chr1_24171409_24171909	chr1	24171409	24171909	Col9a1	-5951	14.7341	31.3563	15.0185	0	1	0
chr1_62416781_62417350	chr1	62416781	62417350	Nrp2	-286251	5.56161	35.3587	6.38658	0	1	0
chr1_62589264_62589764	chr1	62589264	62589764	Nrp2	-113803	5.04401	40.7217	6.67277	0	1	0
chr1_62629945_62630445	chr1	62629945	62630445	Nrp2	-73122	7.55922	34.7488	17.5885	0	1	0
chr1_62647922_62648422	chr1	62647922	62648422	Nrp2	-55145	14.3115	30.973	15.3844	0	1	0
chr1_62717989_62718489	chr1	62717989	62718489	Nrp2	14922	13.2135	46.4161	14.4462	0	1	0
chr1_72573965_72574465	chr1	72573965	72574465	Smarcal1	-9036	11.768	40.2363	24.7703	0	1	0
chr1_72865773_72866273	chr1	72865773	72866273	Igfbp5	8842	26.256	30.0992	16.3227	0	1	0
chr10_121062679_121063179	chr10	121062679	121063179	Wif1	28925	22.4548	36.7	8.36498	0	1	0
chr10_121071212_121071723	chr10	121071212	121071723	Wif1	37464	6.42599	59.2454	25.4224	0	1	0
chr10_127228840_127229340	chr10	127228840	127229340	Pip4k2c	-17468	28.6619	36.9315	25.1804	0	1	0
chr10_13926834_13927334	chr10	13926834	13927334	Hivep2	-39295	11.0199	38.995	7.18178	0	1	0
chr10_14055580_14056080	chr10	14055580	14056080	Hivep2	89451	16.527	30.923	17.5059	0	1	0
chr10_14085751_14086251	chr10	14085751	14086251	Hivep2	119622	10.4762	37.478	14.16	0	1	0
chr10_37571146_37571646	chr10	37571146	37571646	Marcks	-432470	25.0644	44.4528	2.65259	0	1	0
chr10_71032258_71032758	chr10	71032258	71032758	Bicc1	127182	10.2944	51.8856	24.1979	0	1	0
chr10_71071130_71071630	chr10	71071130	71071630	Bicc1	88310	7.62504	34.224	5.87758	0	1	0
chr10_71084073_71084573	chr10	71084073	71084573	Bicc1	75367	5.4348	30.3676	7.75417	0	1	0
chr10_71092393_71092893	chr10	71092393	71092893	Bicc1	67047	8.33385	53.2729	13.2217	0	1	0
chr10_71094753_71095253	chr10	71094753	71095253	Bicc1	64687	10.0006	70.0565	22.1177	0	1	0
chr10_71140323_71140823	chr10	71140323	71140823	Bicc1	19117	22.8615	33.5817	16.8125	0	1	0
chr10_78355947_78356455	chr10	78355947	78356455	Agpat3	-4501	20.0051	70.5388	17.7508	0	1	0
chr10_8026950_8027450	chr10	8026950	8027450	Tab2	-71077	6.48737	35.2565	11.711	0	1	0
chr11_105609412_105609912	chr11	105609412	105609912	Tanc2	19676	5.03032	33.3391	9.14097	0	1	0
chr11_109703758_109704258	chr11	109703758	109704258	Fam20a	18248	12.7339	54.6827	6.52968	0	1	0
chr11_113014549_113015049	chr11	113014549	113015049	2610035D17Rik	187039	18.6335	31.8057	12.6714	0	1	0
chr11_113122123_113122623	chr11	113122123	113122623	2610035D17Rik	79465	4.12842	36.6174	22.5249	0	1	0
chr11_113194689_113195189	chr11	113194689	113195189	2610035D17Rik	6899	7.25222	52.3613	29.2582	0	1	0
chr11_118372543_118373043	chr11	118372543	118373043	Timp2	-17382	22.2801	37.7806	11.469	0	1	0
chr11_67085349_67085849	chr11	67085349	67085849	Myh3	7299	23.6103	31.1432	26.4846	0	1	0
chr11_7461781_7462281	chr11	7461781	7462281	Igfbp3	-248108	14.1309	30.0422	14.6498	0	1	0
chr11_88728483_88728983	chr11	88728483	88728983	C030037D09Rik	10090	22.2066	33.7488	15.4257	0	1	0
chr11_88758321_88758821	chr11	88758321	88758821	C030037D09Rik	39928	21.6089	39.7624	27.2577	0	1	0
chr11_94917277_94917777	chr11	94917277	94917777	Col1a1	-18697	15.0188	53.2861	17.5885	0	1	0
chr11_95595786_95596286	chr11	95595786	95596286	Ngfr	-8338	21.6301	30.7435	10.693	0	1	0
chr12_104813754_104814254	chr12	104813754	104814254	Clmn	51072	16.3975	34.8682	18.6507	0	1	0
chr12_104829811_104830311	chr12	104829811	104830311	Clmn	35015	18.6914	32.0209	22.8332	0	1	0
chr12_108393679_108394179	chr12	108393679	108394179	Eml1	-16704	14.167	30.2646	21.1381	0	1	0
chr12_29831353_29831853	chr12	29831353	29831853	Pxdn	-106433	4.57166	30.3849	18.3232	0	1	0
chr12_70837498_70837998	chr12	70837498	70837998	Frmd6	12234	2.44403	32.1077	29.748	0	1	0
chr12_80057417_80057917	chr12	80057417	80057917	Zfp36l1	55346	16.3647	30.8334	11.9972	0	1	0
chr12_8787015_8787515	chr12	8787015	8787515	Sdc1	15869	5.15834	41.1897	16.6502	0	1	0
chr13_16075846_16076356	chr13	16075846	16076356	Inhba	64250	5.68423	43.3344	24.0164	0	1	0
chr13_31730662_31731162	chr13	31730662	31731162	Foxc1	-75734	3.89224	51.7222	17.9957	0	1	0
chr13_31764421_31764921	chr13	31764421	31764921	Foxc1	-41975	6.78243	55.9795	23.4248	0	1	0
chr13_31784733_31785375	chr13	31784733	31785375	Foxc1	-21592	29.9528	39.2709	29.9353	0	1	0
chr13_42553543_42554043	chr13	42553543	42554043	Phactr1	-127006	3.47515	32.2176	24.1758	0	1	0
chr13_55923469_55923969	chr13	55923469	55923969	Pitx1	-92294	22.215	31.1055	25.1391	0	1	0
chr13_58976272_58976772	chr13	58976272	58976772	Ntrk2	168825	20.3352	59.9092	28.8923	0	1	0
chr13_59041389_59041889	chr13	59041389	59041889	Ntrk2	233942	23.86	38.7798	10.1206	0	1	0
chr13_59092667_59093167	chr13	59092667	59093167	Ntrk2	285220	11.0112	48.9841	26.9773	0	1	0
chr13_60130946_60131446	chr13	60130946	60131446	Gas1	46339	9.8097	52.9363	16.9364	0	1	0
chr13_63411523_63412023	chr13	63411523	63412023	Fancc	19972	11.5027	33.1414	28.73	0	1	0
chr13_83208144_83208700	chr13	83208144	83208700	Mef2c	-295612	3.0881	40.2896	14.9744	0	1	0
chr13_83450704_83451310	chr13	83450704	83451310	Mef2c	-53027	14.3367	56.7	9.83437	0	1	0
chr13_83566138_83566638	chr13	83566138	83566638	Mef2c	-7219	4.72413	34.8785	26.4846	0	1	0
chr13_83603352_83603852	chr13	83603352	83603852	Mef2c	29995	11.5004	44.1765	21.4656	0	1	0
chr13_83649581_83650081	chr13	83649581	83650081	Mef2c	76224	4.6782	54.7907	29.627	0	1	0
chr13_89344204_89344781	chr13	89344204	89344781	Hapln1	-196143	5.02971	46.0206	29.9103	0	1	0
chr13_89542926_89543426	chr13	89542926	89543426	Hapln1	2540	22.4062	34.6194	20.9153	0	1	0
chr13_99488122_99488622	chr13	99488122	99488622	Map1b	28230	4.58211	35.5901	6.20218	0	1	0
chr14_120887798_120888298	chr14	120887798	120888298	Ipo5	-23146	8.07399	36.0251	11.6726	0	1	0
chr14_121183334_121183834	chr14	121183334	121183834	Farp1	148010	5.27651	31.5265	12.2008	0	1	0
chr14_21952557_21953073	chr14	21952557	21953073	Zfp503	36786	8.74367	47.5149	29.7509	0	1	0
chr14_25759585_25760085	chr14	25759585	25760085	Zcchc24	9021	20.7306	53.9538	28.2786	0	1	0
chr14_25787398_25787898	chr14	25787398	25787898	Zcchc24	-18792	19.4928	48.9584	17.3023	0	1	0
chr14_34453544_34454061	chr14	34453544	34454061	Bmpr1a	48743	18.5622	35.4553	18.692	0	1	0
chr14_46959169_46959669	chr14	46959169	46959669	Samd4	-41921	23.3191	93.2849	22.5278	0	1	0
chr14_47027471_47027971	chr14	47027471	47027971	Samd4	26381	8.94816	36.2965	5.50878	0	1	0
chr14_52243938_52244438	chr14	52243938	52244438	Chd8	-6616	24.6381	43.0613	22.547	0	1	0
chr14_76442188_76442688	chr14	76442188	76442688	Tsc22d1	26617	6.05638	45.7659	12.8942	0	1	0
chr14_83958994_83959494	chr14	83958994	83959494	Pcdh17	-484319	15.1292	33.6654	7.55057	0	1	0
chr15_25364243_25364743	chr15	25364243	25364743	Basp1	49271	20.0493	39.9856	28.7079	0	1	0
chr15_74930491_74930991	chr15	74930491	74930991	Ly6e	-24310	8.20679	34.5308	15.7724	0	1	0
chr15_74933967_74934530	chr15	74933967	74934530	Ly6e	-20802	23.9013	61.6013	26.9965	0	1	0
chr15_77298379_77298931	chr15	77298379	77298931	Rbfox2	8398	17.7177	56.2045	19.7513	0	1	0
chr15_83667488_83667988	chr15	83667488	83667988	Scube1	57301	21.653	53.859	22.7698	0	1	0
chr15_83706756_83707256	chr15	83706756	83707256	Scube1	18033	12.3911	31.7131	20.6291	0	1	0
chr15_83709301_83709801	chr15	83709301	83709801	Scube1	15488	5.27508	33.541	3.34599	0	1	0
chr15_92333272_92333772	chr15	92333272	92333772	Pdzrn4	-63288	5.94501	45.9535	6.87638	0	1	0
chr15_92378295_92378855	chr15	92378295	92378855	Pdzrn4	-18235	3.42883	67.9057	11.711	0	1	0
chr15_98028884_98029384	chr15	98028884	98029384	Col2a1	-24410	5.74594	76.1597	22.5662	0	1	0
chr15_99384051_99384551	chr15	99384051	99384551	Tmbim6	-8646	6.75713	48.8944	8.75297	0	1	0
chr15_99847131_99847631	chr15	99847131	99847631	Lima1	-27232	12.8422	31.4827	19.9962	0	1	0
chr16_21727797_21728297	chr16	21727797	21728297	2510009E07Rik	-33382	24.0203	32.656	19.2615	0	1	0
chr16_33922161_33922661	chr16	33922161	33922661	Umps	44592	14.7876	40.1671	19.7513	0	1	0
chr17_62806642_62807142	chr17	62806642	62807142	Efna5	74425	4.14618	33.7408	17.7095	0	1	0
chr17_62836570_62837124	chr17	62836570	62837124	Efna5	44470	3.73616	31.5713	16.9364	0	1	0
chr17_63075108_63075608	chr17	63075108	63075608	Efna5	-194041	7.70561	63.8494	16.3227	0	1	0
chr17_7625342_7625883	chr17	7625342	7625883	Fndc1	179361	8.08576	66.3509	25.3427	0	1	0
chr17_7686301_7686801	chr17	7686301	7686801	Fndc1	118423	12.638	38.8704	5.01899	0	1	0
chr17_7713365_7713865	chr17	7713365	7713865	Fndc1	91359	7.21224	31.4511	7.06077	0	1	0
chr17_7821732_7822232	chr17	7821732	7822232	Fndc1	-17008	22.8776	41.4322	17.3849	0	1	0
chr17_7863688_7864188	chr17	7863688	7864188	Fndc1	-58964	22.5439	30.7885	16.2017	0	1	0
chr18_43321890_43322390	chr18	43321890	43322390	Dpysl3	51132	28.7033	34.7989	17.0987	0	1	0
chr18_43368180_43368680	chr18	43368180	43368680	Dpysl3	4842	3.75522	35.0251	25.3811	0	1	0
chr18_43520697_43521197	chr18	43520697	43521197	Dpysl3	-82661	11.8813	41.8286	13.9564	0	1	0
chr18_5149813_5150313	chr18	5149813	5150313	Svil	103474	17.2828	33.7787	22.1177	0	1	0
chr18_58273553_58274096	chr18	58273553	58274096	Fbn2	-63899	3.4936	49.0349	10.1619	0	1	0
chr18_58324337_58324837	chr18	58324337	58324837	Fbn2	-114661	14.8289	38.7399	3.83579	0	1	0
chr18_58325802_58326496	chr18	58325802	58326496	Fbn2	-116223	10.7398	100.274	12.4898	0	1	0
chr18_63244613_63245113	chr18	63244613	63245113	Piezo2	142320	5.0684	46.7353	20.8106	0	1	0
chr18_63278216_63278716	chr18	63278216	63278716	Piezo2	108717	3.96796	30.4388	29.9516	0	1	0
chr18_63495796_63496296	chr18	63495796	63496296	Piezo2	-108863	9.60922	34.7295	7.46797	0	1	0
chr18_63529770_63530270	chr18	63529770	63530270	Piezo2	-142837	9.76263	39.5534	20.5273	0	1	0
chr18_69500327_69500827	chr18	69500327	69500827	Tcf4	154856	13.2652	32.9699	16.5263	0	1	0
chr18_69507743_69508243	chr18	69507743	69508243	Tcf4	162272	22.0611	31.03	16.5676	0	1	0
chr18_75391625_75392125	chr18	75391625	75392125	Smad7	24510	27.8553	42.9674	25.7086	0	1	0
chr18_75398265_75398765	chr18	75398265	75398765	Smad7	31150	15.2899	33.283	28.4025	0	1	0
chr19_21794432_21794932	chr19	21794432	21794932	Tmem2	16342	26.0306	71.9007	29.5444	0	1	0
chr19_21834670_21835310	chr19	21834670	21835310	Tmem2	56650	25.5036	76.0999	24.6493	0	1	0
chr19_21897368_21897868	chr19	21897368	21897868	Tmem2	119278	10.1107	39.2639	10.7314	0	1	0
chr19_21897889_21898389	chr19	21897889	21898389	Tmem2	119799	14.5841	35.2148	12.487	0	1	0
chr19_47486005_47486505	chr19	47486005	47486505	Sh3pxd2a	-21844	25.9284	53.2677	25.5463	0	1	0
chr2_102533325_102533825	chr2	102533325	102533825	Pamr1	-16446	23.6128	42.043	2.44899	0	1	0
chr2_110379680_110380180	chr2	110379680	110380180	Fibin	-16937	10.047	30.7761	22.4039	0	1	0
chr2_125436184_125436684	chr2	125436184	125436684	Fbn1	70004	18.4794	57.9438	23.5045	0	1	0
chr2_128190155_128190655	chr2	128190155	128190655	Bcl2l11	62830	5.61251	31.3451	16.3227	0	1	0
chr2_157463248_157463748	chr2	157463248	157463748	Src	39205	17.4439	32.7253	26.3607	0	1	0
chr2_164414079_164414579	chr2	164414079	164414579	Matn4	-9169	15.9219	31.3267	27.6457	0	1	0
chr2_167129544_167130044	chr2	167129544	167130044	Kcnb1	59024	27.0314	30.9056	8.48887	0	1	0
chr2_33165837_33166337	chr2	33165837	33166337	Angptl2	-49874	23.3725	30.5856	17.1208	0	1	0
chr2_33187740_33188240	chr2	33187740	33188240	Angptl2	-27971	9.93259	61.7105	21.7105	0	1	0
chr2_33223772_33224272	chr2	33223772	33224272	Angptl2	8061	14.1619	69.0027	23.5871	0	1	0
chr2_63970146_63970646	chr2	63970146	63970646	Fign	127642	6.18401	34.3992	15.2606	0	1	0
chr2_77048455_77048955	chr2	77048455	77048955	Ttn	-66158	3.91032	56.9579	13.6702	0	1	0
chr3_107769618_107770118	chr3	107769618	107770118	Csf1	-9399	6.73277	32.5206	28.1163	0	1	0
chr3_107810658_107811158	chr3	107810658	107811158	Csf1	-50439	24.1688	33.4797	6.89558	0	1	0
chr3_144207504_144208004	chr3	144207504	144208004	Lmo4	-2499	17.9158	30.1176	19.4651	0	1	0
chr3_144241991_144242491	chr3	144241991	144242491	Lmo4	-36986	16.8197	30.6977	22.2195	0	1	0
chr3_55213856_55214356	chr3	55213856	55214356	Dclk1	-28420	17.0156	56.1771	18.5681	0	1	0
chr3_55534661_55535161	chr3	55534661	55535161	Dclk1	73153	15.2252	36.4607	20.2824	0	1	0
chr3_9569094_9569594	chr3	9569094	9569594	Zfp704	40741	4.09952	36.486	13.7115	0	1	0
chr4_105904512_105905012	chr4	105904512	105905012	Usp24	-411451	7.15764	58.9762	10.4068	0	1	0
chr4_105904925_105905425	chr4	105904925	105905425	Usp24	-411038	5.81716	41.5615	4.02018	0	1	0
chr4_106028177_106028677	chr4	106028177	106028677	Usp24	-287786	6.69002	39.0284	12.487	0	1	0
chr4_106096086_106096586	chr4	106096086	106096586	Usp24	-219877	8.53838	35.8162	10.1206	0	1	0
chr4_106100104_106100604	chr4	106100104	106100604	Usp24	-215859	10.0601	35.3535	12.8337	0	1	0
chr4_106150802_106151302	chr4	106150802	106151302	Usp24	-165161	8.12541	36.8651	16.2017	0	1	0
chr4_116668158_116668658	chr4	116668158	116668658	Akr1a1	-16734	14.2695	37.851	22.0793	0	1	0
chr4_130947293_130947793	chr4	130947293	130947793	Matn1	3158	28.8819	32.5806	19.1789	0	1	0
chr4_135051351_135051851	chr4	135051351	135051851	Runx3	-69044	4.45437	34.9559	15.3432	0	1	0
chr4_135095553_135096053	chr4	135095553	135096053	Runx3	-24842	2.9351	41.8595	29.6049	0	1	0
chr4_135136696_135137196	chr4	135136696	135137196	Runx3	16301	4.76807	32.911	15.3432	0	1	0
chr4_55586271_55586793	chr4	55586271	55586793	Klf4	-54057	3.54305	37.5167	11.8762	0	1	0
chr4_58497144_58497644	chr4	58497144	58497644	Lpar1	2009	17.0995	33.1689	6.52968	0	1	0
chr4_58573993_58574493	chr4	58573993	58574493	Lpar1	-20752	5.67469	33.8672	7.75417	0	1	0
chr4_64028573_64029073	chr4	64028573	64029073	Tnc	18192	5.61869	56.9438	21.1381	0	1	0
chr4_64238242_64238742	chr4	64238242	64238742	Tnc	-191477	26.1566	75.7773	23.3009	0	1	0
chr4_64258498_64259006	chr4	64258498	64259006	Tnc	-211737	4.62802	37.8308	6.83508	0	1	0
chr4_64268843_64269360	chr4	64268843	64269360	Tnc	-222087	19.2046	43.8247	17.4262	0	1	0
chr4_64269394_64269894	chr4	64269394	64269894	Tnc	-222629	9.44777	34.6794	15.6706	0	1	0
chr4_64306809_64307309	chr4	64306809	64307309	Tnc	-260044	6.19695	56.8938	26.4846	0	1	0
chr4_64407688_64408203	chr4	64407688	64408203	Tnc	-360931	6.25816	59.9052	11.7523	0	1	0
chr4_82289572_82290072	chr4	82289572	82290072	Nfib	215957	8.37911	41.9909	22.0764	0	1	0
chr4_82338465_82338965	chr4	82338465	82338965	Nfib	167064	14.844	30.1412	6.48838	0	1	0
chr4_82368779_82369279	chr4	82368779	82369279	Nfib	136750	8.30192	51.2911	24.8913	0	1	0
chr4_82386203_82386703	chr4	82386203	82386703	Nfib	119326	29.3503	32.9659	10.6104	0	1	0
chr4_8963010_8963511	chr4	8963010	8963511	Chd7	272855	8.90184	34.3064	19.1405	0	1	0
chr4_97193174_97193674	chr4	97193174	97193674	Nfia	-388519	21.6092	34.5367	9.34457	0	1	0
chr4_97237097_97237597	chr4	97237097	97237597	Nfia	-344596	12.0446	40.8451	9.18227	0	1	0
chr4_97895828_97896328	chr4	97895828	97896328	Nfia	118452	12.0643	37.2996	7.87518	0	1	0
chr4_97926888_97927388	chr4	97926888	97927388	Nfia	149512	20.688	30.8711	5.34648	0	1	0
chr4_98040150_98040650	chr4	98040150	98040650	Nfia	262774	9.98328	31.6204	2.85619	0	1	0
chr5_113503070_113503570	chr5	113503070	113503570	Wscd2	-47100	22.4846	32.24	24.1403	0	1	0
chr5_122235053_122235553	chr5	122235053	122235553	Hvcn1	25016	9.8086	39.4597	18.0562	0	1	0
chr5_123015905_123016405	chr5	123015905	123016405	Orai1	1081	15.6015	46.4101	11.8762	0	1	0
chr5_134719982_134720482	chr5	134719982	134720482	Eln	27091	22.0004	42.9123	24.3631	0	1	0
chr5_134750415_134750915	chr5	134750415	134750915	Eln	-3342	12.2057	42.4629	28.6887	0	1	0
chr5_134790476_134790976	chr5	134790476	134790976	Eln	-43403	19.7779	48.3091	22.0793	0	1	0
chr5_136818145_136818645	chr5	136818145	136818645	Col26a1	64712	13.1909	40.427	13.3043	0	1	0
chr5_21492029_21492529	chr5	21492029	21492529	Lrrc17	-51248	24.5582	42.7391	5.14288	0	1	0
chr5_21591965_21592473	chr5	21591965	21592473	Lrrc17	48692	26.0253	30.19	22.6901	0	1	0
chr5_33239176_33239676	chr5	33239176	33239676	Spon2	-21188	21.0991	35.5278	23.5487	0	1	0
chr5_33737827_33738327	chr5	33737827	33738327	Fgfr3	15771	19.3464	31.9547	27.7091	0	1	0
chr5_41562272_41562772	chr5	41562272	41562772	Rab28	145169	25.4391	68.9922	26.6056	0	1	0
chr5_53508347_53508942	chr5	53508347	53508942	Rbpj	-47134	3.07061	61.0256	13.7115	0	1	0
chr5_53546629_53547178	chr5	53546629	53547178	Rbpj	-8875	1.98437	41.9458	29.2169	0	1	0
chr5_53564208_53564708	chr5	53564208	53564708	Rbpj	8679	22.5788	39.5719	27.5439	0	1	0
chr5_53565249_53565749	chr5	53565249	53565749	Rbpj	9720	23.2905	34.9141	5.79498	0	1	0
chr5_64737948_64738448	chr5	64737948	64738448	Klf3	-65325	10.4389	40.9155	27.9319	0	1	0
chr5_66772516_66773016	chr5	66772516	66773016	Limch1	26926	10.717	42.4945	25.0565	0	1	0
chr5_66943459_66943959	chr5	66943459	66943959	Limch1	-24707	11.0308	30.7762	21.0171	0	1	0
chr5_66958054_66958554	chr5	66958054	66958554	Limch1	-10112	7.52849	42.0979	26.7679	0	1	0
chr6_143895161_143895661	chr6	143895161	143895661	Sox5	51695	2.19623	30.1728	6.44708	0	1	0
chr6_144047053_144047553	chr6	144047053	144047553	Sox5	-100197	4.78352	36.3922	24.6877	0	1	0
chr6_144264417_144264921	chr6	144264417	144264921	Sox5	-55101	28.1655	43.3425	26.1571	0	1	0
chr6_144312418_144313091	chr6	144312418	144313091	Sox5	-103187	8.03936	52.4908	15.7504	0	1	0
chr6_144367725_144368225	chr6	144367725	144368225	Sox5	-158407	3.67677	56.3727	4.61178	0	1	0
chr6_146221344_146221844	chr6	146221344	146221844	Itpr2	280629	8.47823	34.6083	25.8709	0	1	0
chr6_146272203_146272703	chr6	146272203	146272703	Itpr2	229770	19.7976	31.4347	24.6493	0	1	0
chr6_146452375_146452875	chr6	146452375	146452875	Itpr2	49598	8.83557	30.6774	21.2812	0	1	0
chr6_6909457_6909957	chr6	6909457	6909957	Dlx5	-27639	28.5983	38.328	16.6915	0	1	0
chr6_84511651_84512151	chr6	84511651	84512151	Cyp26b1	81909	8.41384	39.529	16.9143	0	1	0
chr6_98743890_98744390	chr6	98743890	98744390	Foxp1	284158	6.43101	48.8056	29.7893	0	1	0
chr6_98769981_98770481	chr6	98769981	98770481	Foxp1	258067	26.6933	69.459	18.1993	0	1	0
chr6_98921784_98922284	chr6	98921784	98922284	Foxp1	106264	11.5412	38.1366	6.08118	0	1	0
chr6_99065926_99066426	chr6	99065926	99066426	Foxp1	-37878	29.0031	34.2138	17.9765	0	1	0
chr6_99146212_99146738	chr6	99146212	99146738	Foxp1	-118177	3.88207	32.295	22.1177	0	1	0
chr6_99337501_99338001	chr6	99337501	99338001	Foxp1	-71236	5.64614	35.6867	13.5492	0	1	0
chr6_99474928_99475428	chr6	99474928	99475428	Foxp1	-39833	15.0966	35.8163	12.1624	0	1	0
chr7_100131679_100132179	chr7	100131679	100132179	Pold3	-10429	1.9549	37.0547	20.7501	0	1	0
chr7_109836711_109837211	chr7	109836711	109837211	Scube2	28718	5.62323	34.437	18.813	0	1	0
chr7_112154454_112154954	chr7	112154454	112154954	Dkk3	4353	17.0121	42.2161	14.8975	0	1	0
chr7_112164727_112165227	chr7	112164727	112165227	Dkk3	-5920	7.90941	33.2351	9.91696	0	1	0
chr7_115461759_115462259	chr7	115461759	115462259	Sox6	339600	2.84481	34.1026	26.936	0	1	0
chr7_115481623_115482123	chr7	115481623	115482123	Sox6	319736	2.08718	30.396	28.851	0	1	0
chr7_115548328_115548828	chr7	115548328	115548828	Sox6	253031	5.597	31.2799	10.4068	0	1	0
chr7_115637606_115638126	chr7	115637606	115638126	Sox6	163743	1.63352	32.7946	26.79	0	1	0
chr7_115647700_115648248	chr7	115647700	115648248	Sox6	153635	3.92526	37.4044	26.4049	0	1	0
chr7_115686565_115687065	chr7	115686565	115687065	Sox6	114794	4.21151	31.2351	10.3242	0	1	0
chr7_133963951_133964451	chr7	133963951	133964451	Dhx32	-181416	6.25614	30.97	4.61178	0	1	0
chr7_139624883_139625444	chr7	139624883	139625444	Nkx6-2	-42367	16.5726	34.6377	18.0783	0	1	0
chr7_74043523_74044023	chr7	74043523	74044023	St8sia2	-30091	18.5439	34.5481	23.0973	0	1	0
chr8_102096709_102097209	chr8	102096709	102097209	Cdh11	688152	8.21825	42.9737	2.93879	0	1	0
chr8_102098896_102099508	chr8	102098896	102099508	Cdh11	685909	10.2562	73.6205	13.1804	0	1	0
chr8_102116828_102117328	chr8	102116828	102117328	Cdh11	668033	10.7262	38.4086	5.59138	0	1	0
chr8_102500178_102500678	chr8	102500178	102500678	Cdh11	284683	21.7909	38.7562	6.97818	0	1	0
chr8_103055978_103056478	chr8	103055978	103056478	Cdh11	-271117	15.644	30.8354	0.489798	0	1	0
chr8_105206740_105207240	chr8	105206740	105207240	D230025D16Rik	-18198	7.78173	43.5943	14.3636	0	1	0
chr8_107455188_107455688	chr8	107455188	107455688	Wwp2	19040	15.1229	35.5868	27.7091	0	1	0
chr8_108673805_108674305	chr8	108673805	108674305	Zfhx3	-40589	5.4883	39.6839	23.9559	0	1	0
chr8_11327292_11327792	chr8	11327292	11327792	Col4a1	-14716	22.4595	40.3293	28.9336	0	1	0
chr8_127134022_127134522	chr8	127134022	127134522	Pard3	70216	9.21189	34.2412	1.81609	0	1	0
chr8_127139096_127139596	chr8	127139096	127139596	Pard3	75290	27.5212	30.0361	28.4851	0	1	0
chr8_127214674_127215174	chr8	127214674	127215174	Pard3	-84688	17.342	32.337	3.63219	0	1	0
chr8_127543635_127544135	chr8	127543635	127544135	Pard3	244233	9.11312	49.1361	7.50927	0	1	0
chr8_127553623_127554123	chr8	127553623	127554123	Pard3	254221	21.3642	39.5983	6.28478	0	1	0
chr8_127720756_127721265	chr8	127720756	127721265	Pard3	421359	27.6217	40.9132	9.63077	0	1	0
chr8_57429127_57429627	chr8	57429127	57429627	Scrg1	-26546	29.9099	34.1342	13.7941	0	1	0
chr8_57468522_57469022	chr8	57468522	57469022	Scrg1	12849	20.2831	30.4827	15.9568	0	1	0
chr8_80857704_80858204	chr8	80857704	80858204	Gab1	22525	24.4033	35.5044	13.5492	0	1	0
chr9_108460771_108461271	chr9	108460771	108461271	Ccdc71	503	28.5638	31.1902	29.748	0	1	0
chr9_40617451_40617951	chr9	40617451	40617951	Clmp	-68263	16.1947	48.6037	12.2834	0	1	0
chr9_41098996_41099496	chr9	41098996	41099496	Ubash3b	58248	13.7686	55.3301	21.2207	0	1	0
chr9_60237563_60238063	chr9	60237563	60238063	Thsd4	-96593	19.8068	44.0531	29.6683	0	1	0
chr9_60445859_60446359	chr9	60445859	60446359	Thsd4	64926	15.1319	33.6622	10.6104	0	1	0
chr9_60466859_60467359	chr9	60466859	60467359	Thsd4	43926	2.9688	38.2547	11.7936	0	1	0
chr9_60491423_60491923	chr9	60491423	60491923	Thsd4	19362	20.6395	32.543	7.55057	0	1	0
chr9_65664090_65664590	chr9	65664090	65664590	Oaz2	-12208	23.9512	35.5501	18.8543	0	1	0
chr9_67036683_67037183	chr9	67036683	67037183	Tpm1	6938	19.9403	36.0975	22.5249	0	1	0
chr9_67077833_67078333	chr9	67077833	67078333	Tpm1	-28870	20.8666	41.5495	16.3227	0	1	0
chr9_71512777_71513377	chr9	71512777	71513377	Polr2m	-27094	21.8354	65.3439	15.3047	0	1	0
chrX_73474450_73474950	chrX	73474450	73474950	Bgn	-8901	22.3411	33.5389	7.26437	0	1	0
